# Supplementary material for: Consideration of antimicrobial resistance and contextual factors in infectious disease guidelines: a systematic survey
Source: PubMed Central journal article supplement — BMJ Open. 2021 Jul 30;11(7):e046097. doi: 10.1136/bmjopen-2020-046097 (PMC8327810; doi:10.1136/bmjopen-2020-046097), 2021-07-30
Supplement: bmjopen-2020-046097.draft_revisions.pdf [file bmjopen-2020-046097.draft_revisions.pdf]

# BMJ Open

BMJ Open is committed to open peer review. As part of this commitment we make the peer review history of every article we publish publicly available.

When an article is published we post the peer reviewers' comments and the authors' responses online. We also post the versions of the paper that were used during peer review. These are the versions that the peer review comments apply to.

The versions of the paper that follow are the versions that were submitted during the peer review process. They are not the versions of record or the final published versions. They should not be cited or distributed as the published version of this manuscript.

BMJ Open is an open access journal and the full, final, typeset and author-corrected version of record of the manuscript is available on our site with no access controls, subscription charges or pay-per-view fees (<http://bmjopen.bmj.com>).

If you have any questions on BMJ Open's open peer review process please email [info.bmjopen@bmj.com](mailto:info.bmjopen@bmj.com)

# BMJ Open

## Antimicrobial Guidance: the need to consider antimicrobial resistance and context

|                               |                                                                                                                                                                                                                                                                                                                                                                                                                                                                                                                                                                                                                                                                                                                                                                                                                                                                                                                                                                                                                                                                                                                                                                                                                                                                                                                                                                                                                                   |
|-------------------------------|-----------------------------------------------------------------------------------------------------------------------------------------------------------------------------------------------------------------------------------------------------------------------------------------------------------------------------------------------------------------------------------------------------------------------------------------------------------------------------------------------------------------------------------------------------------------------------------------------------------------------------------------------------------------------------------------------------------------------------------------------------------------------------------------------------------------------------------------------------------------------------------------------------------------------------------------------------------------------------------------------------------------------------------------------------------------------------------------------------------------------------------------------------------------------------------------------------------------------------------------------------------------------------------------------------------------------------------------------------------------------------------------------------------------------------------|
| Journal:                      | <i>BMJ Open</i>                                                                                                                                                                                                                                                                                                                                                                                                                                                                                                                                                                                                                                                                                                                                                                                                                                                                                                                                                                                                                                                                                                                                                                                                                                                                                                                                                                                                                   |
| Manuscript ID                 | bmjopen-2020-046097                                                                                                                                                                                                                                                                                                                                                                                                                                                                                                                                                                                                                                                                                                                                                                                                                                                                                                                                                                                                                                                                                                                                                                                                                                                                                                                                                                                                               |
| Article Type:                 | Original research                                                                                                                                                                                                                                                                                                                                                                                                                                                                                                                                                                                                                                                                                                                                                                                                                                                                                                                                                                                                                                                                                                                                                                                                                                                                                                                                                                                                                 |
| Date Submitted by the Author: | 21-Oct-2020                                                                                                                                                                                                                                                                                                                                                                                                                                                                                                                                                                                                                                                                                                                                                                                                                                                                                                                                                                                                                                                                                                                                                                                                                                                                                                                                                                                                                       |
| Complete List of Authors:     | <p>Stalteri, Rosa; McMaster University, Department of Health Research Methods, Evidence and Impact</p> <p>Santesso, Nancy; McMaster University, Department of Health Research Methods, Evidence and Impact</p> <p>Bognanni, Antonio; McMaster University, Department of Health Research Methods, Evidence and Impact</p> <p>Darzi, Andrea; McMaster University, Department of Health Research Methods, Evidence and Impact</p> <p>Karam, Samer; McMaster University, Department of Health Research Methods, Evidence and Impact</p> <p>Piggott, Thomas; McMaster University, Department of Health Research Methods, Evidence and Impact</p> <p>Baldeh, Tejan; McMaster University Faculty of Health Sciences, Department of Health Research Methods, Evidence, and Impact (HEI)</p> <p>Schunemann, Finn; McMaster University, Michael G. DeGroot Cochrane Canada and MacGRADE Centres</p> <p>Ventresca, Matthew; McMaster University, Department of Health Research Methods, Evidence and Impact</p> <p>Morgano, Gian Paolo; McMaster University, Department of Health Research Methods, Evidence and Impact</p> <p>MOJA, Lorenzo; World Health Organization, Department of Health Product Policy and Standards</p> <p>Loeb, Mark; McMaster University, Department of Health Research Methods, Evidence and Impact</p> <p>Schunemann, Holger; McMaster University, Department of Health Research Methods, Evidence and Impact</p> |
| Keywords:                     | Tuberculosis < INFECTIOUS DISEASES, Respiratory infections < THORACIC MEDICINE, Protocols & guidelines < HEALTH SERVICES ADMINISTRATION & MANAGEMENT                                                                                                                                                                                                                                                                                                                                                                                                                                                                                                                                                                                                                                                                                                                                                                                                                                                                                                                                                                                                                                                                                                                                                                                                                                                                              |
|                               |                                                                                                                                                                                                                                                                                                                                                                                                                                                                                                                                                                                                                                                                                                                                                                                                                                                                                                                                                                                                                                                                                                                                                                                                                                                                                                                                                                                                                                   |

SCHOLARONE™  
Manuscripts

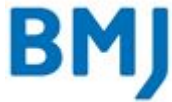

I, the Submitting Author has the right to grant and does grant on behalf of all authors of the Work (as defined in the below author licence), an exclusive licence and/or a non-exclusive licence for contributions from authors who are: i) UK Crown employees; ii) where BMJ has agreed a CC-BY licence shall apply, and/or iii) in accordance with the terms applicable for US Federal Government officers or employees acting as part of their official duties; on a worldwide, perpetual, irrevocable, royalty-free basis to BMJ Publishing Group Ltd ("BMJ") its licensees and where the relevant Journal is co-owned by BMJ to the co-owners of the Journal, to publish the Work in this journal and any other BMJ products and to exploit all rights, as set out in our [licence](#).

The Submitting Author accepts and understands that any supply made under these terms is made by BMJ to the Submitting Author unless you are acting as an employee on behalf of your employer or a postgraduate student of an affiliated institution which is paying any applicable article publishing charge ("APC") for Open Access articles. Where the Submitting Author wishes to make the Work available on an Open Access basis (and intends to pay the relevant APC), the terms of reuse of such Open Access shall be governed by a Creative Commons licence – details of these licences and which [Creative Commons](#) licence will apply to this Work are set out in our licence referred to above.

Other than as permitted in any relevant BMJ Author's Self Archiving Policies, I confirm this Work has not been accepted for publication elsewhere, is not being considered for publication elsewhere and does not duplicate material already published. I confirm all authors consent to publication of this Work and authorise the granting of this licence.

## Antimicrobial Guidance: the need to consider antimicrobial resistance and context

Rosa Stalteri<sup>1,3</sup>, MPH, Nancy Santesso<sup>1,2,3</sup>, PhD, Antonio Bognanni<sup>1</sup>, MD, Andrea J. Darzi<sup>1</sup>, MD, PhD, Samer G. Karam<sup>1</sup>, MD, Thomas Piggott<sup>1,2,5</sup>, MD, Tejan Baldeh<sup>3</sup>, MPH, Finn C. Schünemann<sup>3</sup>, MD, Matthew Ventresca<sup>1,3</sup>, MSc, Gian Paolo Morgano<sup>1,3</sup>, PhD, Lorenzo Moja<sup>6</sup>, MD, PhD, Prof Mark Loeb<sup>1,2,3,4,5</sup>, MD, Prof Holger J. Schünemann<sup>1,2,3,7</sup>, MD, PhD

1. Department of Health Research Methods, Evidence and Impact, Faculty of Health Sciences, McMaster University, Hamilton (ON), Canada
2. WHO Collaborating Centre for Infectious Diseases, Research Methods and Recommendations
3. Michael G. DeGroot Cochrane Canada and MacGRADE Centres, McMaster University, Hamilton (ON), Canada
4. Department of Pathology and Molecular Medicine, McMaster University, Hamilton (ON), Canada
5. Michael G. DeGroot Institute for Infectious Disease Research, McMaster University, Hamilton (ON), Canada
6. Department of Health Product Policy and Standards, World Health Organization, Geneva 1211, Switzerland.
7. Department of Medicine, McMaster University, Hamilton (ON), Canada
8. Institut für Evidence in Medicine, Medical Center & Faculty of Medicine, University of Freiburg, Freiburg, Germany.

Corresponding author:  
Prof. Holger Schünemann  
WHO Collaborating Centre for Infectious Diseases, Research Methods and Recommendations

1  
2  
3 Michael G DeGroot Cochrane Canada and McMaster GRADE centres; Department of Health  
4 Research Methods, Evidence and Impact, McMaster University, HSC-2C, 1280 Main St West;  
5 Hamilton, ON L8N 3Z5, Canada.

6 E-mail: [holger.schunemann@mcmaster.ca](mailto:holger.schunemann@mcmaster.ca)

7 Tel: +1 905 525 9140 x 24931

8 Fax: 1 905 522 9507

9 Main text word count: 2956

10  
11  
12 Abstract word count: 258

13  
14 Reference count: 105

15  
16  
17  
18  
19  
20  
21  
22  
23  
24  
25  
26  
27  
28  
29  
30  
31  
32  
33  
34  
35  
36  
37  
38  
39  
40  
41  
42  
43  
44  
45  
46  
47  
48  
49  
50  
51  
52  
53  
54  
55  
56  
57  
58  
59  
60

For peer review only

1  
2  
3 **Abstract (word count = 258/300)**  
4  
5

6 **Objectives:** Guidelines that include antimicrobial recommendations should explicitly consider  
7  
8 contextual factors that influence antimicrobial resistance and their downstream effects on  
9  
10 resistance selection. The objectives were to analyze how, and to what extent, guidelines are  
11  
12 considering antimicrobial resistance; are of acceptable quality; and if they can be easily  
13  
14 contextualized to fit the needs of specific populations and health systems.  
15  
16

17  
18 **Methods:** We conducted a systematic review and searched Ovid MEDLINE and Embase from  
19  
20 2007 to June 7 2019 for tuberculosis, gonorrhoea, and respiratory tract infection guidelines  
21  
22 published in English. To complement, we searched guideline databases, key websites, and  
23  
24 reference lists. We identified guidelines and recommendations that considered contextual factors  
25  
26 including antimicrobial resistance, values, resource use, equity, acceptability, and feasibility. We  
27  
28 assessed quality of the guidelines using the Appraisal of Guidelines for Research and Evaluation  
29  
30 II tool focusing on the domains scope and purpose, rigour of development, and editorial  
31  
32 independence. PROSPERO, registration CRD42020145235.  
33  
34  
35  
36  
37

38 **Results:** We screened 10,365 records of which, 74 guidelines met inclusion criteria.  
39  
40 Approximately two thirds of recommendations considered antimicrobial resistance at the  
41  
42 population- and/or outcome-level. 39% (n = 29/74) acceptable quality scores. Five of the 29  
43  
44 guidelines reported all factors required for recommendation contextualization. Equity was the  
45  
46 least considered across guidelines.  
47  
48  
49

50  
51 **Discussion:** Relatively few guidelines for highly prevalent infectious diseases are considering  
52  
53 local aspects including resistance and many do not consider contextual factors necessary for  
54  
55  
56  
57  
58  
59  
60

1  
2  
3 appropriate antimicrobial use. Improving the quality of guidelines targeting specific regional  
4  
5 areas is required.  
6  
7  
8  
9  
10

### 11 **Strengths and limitations of this study**

- 12  
13  
14  
15 • To our knowledge, this is the first study to assess the extent to which guidelines are  
16  
17 considering local dimensions such as antimicrobial resistance.  
18  
19
- 20  
21 • We also employed systematic methods to conduct our review and validated tools to  
22  
23 measure the quality of guidelines.  
24  
25
- 26  
27 • We used established frameworks including AGREE II, and GRADE Evidence to  
28  
29 Decision framework to assess guidelines.  
30  
31
- 32  
33 • The use of the credibility cut-off score of 60% or greater for three of the six AGREE II  
34  
35 domains is based on limited guidance on cut-off thresholds, but by focusing on three key  
36  
37 AGREE II domains and a relatively low score we were more inclusive.  
38  
39
- 40  
41 • We used criteria of the GRADE Evidence to Decision Frameworks that are fairly general  
42  
43 as they apply to any interventions. These dimensions could be complemented with  
44  
45 specific criteria related to the antimicrobial field. For example, providing guidance on the  
46  
47 appropriate threshold for escalating empiric guidance from narrower spectrum agents to  
48  
49 broader spectrum agents.  
50  
51

52  
53 **Registration:** International Prospective Register of Systematic Reviews (PROSPERO),  
54  
55 CRD42020145235.  
56  
57

1  
2  
3 **Funding:** Michael G. DeGroot Cochrane Canada and McMaster GRADE centres (no specific  
4 award/grant number).  
5  
6

7 **Keywords:** Antimicrobial resistance, tuberculosis, gonorrhoea, respiratory tract infections,  
8 guidelines, recommendations, contexts, GRADE.  
9  
10  
11  
12  
13  
14  
15  
16  
17  
18  
19  
20  
21  
22  
23  
24  
25  
26  
27  
28  
29  
30  
31  
32  
33  
34  
35  
36  
37  
38  
39  
40  
41  
42  
43  
44  
45  
46  
47  
48  
49  
50  
51  
52  
53  
54  
55  
56  
57  
58  
59  
60



## Introduction

Antimicrobials are essential to protecting human health. Their effectiveness is under threat due to antimicrobial resistance (AMR), generated by well documented excessive misuse of antimicrobials over several decades. At the 2015 United Nations General Assembly, member states committed to address AMR by adopting national plans centered on five strategic objectives outlined in the World Health Organization (WHO)'s Global Action Plan (1, 2). The fourth objective of the Global Action Plan is to implement national and hospital treatment guidelines for the optimization of antimicrobial medicines use (2). Guidelines are within a package of AMR stewardship interventions intended to modify clinician behavior by providing guidance on when, and how, to prescribe antimicrobials, integrating information on antimicrobial consumption, resistance surveillance, research and development, and burden of resistance (3-5). Preservation of antimicrobials requires the consideration of how, and under what conditions, is it appropriate to recommend antimicrobials. However, only a scant minority of recently published guidelines considered epidemiological and resistance pattern data (6). Concerns with guidelines in the context of AMR also involves the lack of considering important contextual factors. These include considering evidence on values, resource use, equity, acceptability, and feasibility that go beyond resistance patterns and may influence secular trends in AMR (7, 8). For example, guideline recommendations that account for antimicrobial resistance burden, public health infrastructure and medicine policies, and equitability of antimicrobial regimens are likely to better support effective use of antimicrobials in specific contexts (9). Such factors are also relevant for those implementing or adapting guidelines. These omissions likely result from the lack of formal guidance for developing recommendations that consider AMR and other local factors.

1  
2  
3 Incomplete reporting of evidence supporting recommendations, and the ‘develop from scratch’  
4 mentality results in additional challenges. Scientific societies and other organizations duplicate  
5 the same work to develop recommendations. In turn, having multiple guidelines on the same  
6 topic may lead to confusion and loss of confidence by clinicians, and resource waste (8, 10).  
7  
8  
9

10  
11 Through transparent reporting, and proper inclusion of AMR as more research becomes  
12 available, information can be effectively used in recommendations by others. Formal processes  
13 for adaptation permit societies and organizations to capitalize on existing evidence evaluation  
14 and interpretation by considering important contextual factors, among which AMR is the most  
15 noticeable. This would reduce cost and redundancy (7).  
16  
17  
18  
19  
20  
21  
22

23  
24 The objectives were to analyze how, and to what extent, guidelines are considering antimicrobial  
25 resistance; are of acceptable methodological quality; and if they can be easily contextualized to  
26 fit the needs of specific populations.  
27  
28  
29  
30  
31

## 32 **Methods**

### 33 34 35 36 SELECTION CRITERIA AND SEARCH STRATEGY

37  
38  
39 We selected three types of infection: tuberculosis (TB), gonorrhoea, and respiratory tract  
40 infections, specifically otitis media, pharyngitis, sinusitis, and community-acquired pneumonia.  
41  
42 These infections are a public health priority because they are becoming increasingly harder to  
43 treat due to AMR and/or are treated inappropriately, leading to higher risk of toxicity or  
44 resistance development. Harder to treat drug-resistant TB strains are increasing and projected to  
45 account for a quarter of all TB deaths by 2050 (11). *Neisseria gonorrhoea* is an urgent public  
46 health threat (12). The international spread of resistance to the last effective therapy, ceftriaxone  
47 and azithromycin, threatens sustained treatment of gonorrhoea (13, 14). Otitis media,  
48  
49  
50  
51  
52  
53  
54  
55  
56  
57  
58  
59  
60

1  
2  
3 pharyngitis, sinusitis, and community-acquired pneumonia are prevalent and *Streptococcus*  
4  
5 *pneumoniae* (the main causal microorganism), was classified as a serious public health threat due  
6  
7 to resistance observed by inappropriate use of antibiotics (12, 15, 16). All these syndromes have  
8  
9 been prioritized by WHO as part of Access, Watch, and Reserve (AWaRe) — a new  
10  
11 classification system that support a more nuanced approach to target inappropriate use of broad  
12  
13 spectrum “Watch” antibiotics (17).  
14  
15

16  
17  
18 We included English language guidelines published between 2007 and 2019 on the above  
19  
20 selected infections. We marked the 2007 WHO decision to update its guideline development and  
21  
22 using the Grading of Recommendations, Assessment, Development, and Evaluation (GRADE)  
23  
24 approach as a major change in methodology, representing a division of two eras (18). We limited  
25  
26 the focus of our analyses to the era following this change.  
27  
28

29  
30 We included guidelines with clearly articulated recommendations as defined by the Institute of  
31  
32 Medicine (IOM) Standards for Developing Trustworthy Clinical Practice Guidelines (14). After  
33  
34 contacting guideline developers, we excluded guidelines with unobtainable supplementary  
35  
36 materials required for analysis.  
37  
38

39  
40 We searched Ovid MEDLINE and Embase from inception to June 7, 2019 (detailed search  
41  
42 strategies in supplement). We conducted a second search in four guideline databases: TRIP  
43  
44 (<https://www.tripdatabase.com>), G-I-N (<https://www.g-i-n.net/home>), BIGG  
45  
46 (<http://sites.bvsalud.org/bigg/en/biblio/>), and the Canadian Medical Association clinical practice  
47  
48 guideline (CPG) Infobase (<https://joulecma.ca/cpg/homepage>). We finally searched key  
49  
50 international websites (table 6, supplement) and reviewed references of included guidelines.  
51  
52  
53  
54  
55  
56  
57  
58  
59  
60

1  
2  
3 Independently and in pairs, reviewers (RS, AB, AD, MV, GPM, SK, and TB) screened titles and  
4  
5 abstracts and the full text of potentially eligible guidelines. Disagreements were resolved by  
6  
7 discussion or with a third reviewer (NS, HJS).  
8  
9

## 10 11 DATA EXTRACTION AND QUALITY ASSESSMENT 12 13

14 We extracted data from guidelines, retrievable supplementary materials, and guideline  
15  
16 development documents facilitated by pilot-tested forms and distillerSR  
17  
18 (<https://www.evidencepartners.com>). Extractors (RS, AB, AD, FS, GPM, MV, and SK) recorded  
19  
20 data independently and in pairs, and resolved disagreements.  
21  
22

23 Reviewers screened through recommendations classifying them as either considering AMR or  
24  
25 not according to AMR dimensions. Although guidelines may have adopted different approaches  
26  
27 to considering resistance with varying level of technicalities and detail, our operational  
28  
29 definitions for considering a guideline “compliant” were inclusive. We assumed that for each  
30  
31 recommendation, there would be an opportunity to consider information pertaining to AMR at  
32  
33 the population- and outcome-level, given that formulation of specific recommendations is guided  
34  
35 by population, intervention, comparison, and outcome (PICO) frameworks. Population-level  
36  
37 considerations include recommendations for populations with some level of resistance,  
38  
39 considerations of local resistance patterns, recommending the use of narrow-spectrum  
40  
41 antimicrobials, and recommending the watchful-waiting approach to prescribing. Outcome-level  
42  
43 dimensions included considering future prospects of AMR or the emergence of resistance as a  
44  
45 consequence of antimicrobial use (examples provided in table 1)  
46  
47  
48  
49  
50  
51  
52  
53  
54  
55  
56  
57  
58  
59  
60

Table 1: Satisfactory recommendations that consider antimicrobial resistance dimensions

| AMR dimension(s)                                          | Recommendation                                                                                                                                                                                                                                                                                                                                                                        | Evidence illustration                                                                                                                                                                                                                                                                                                                                                                                                                                                                                 |
|-----------------------------------------------------------|---------------------------------------------------------------------------------------------------------------------------------------------------------------------------------------------------------------------------------------------------------------------------------------------------------------------------------------------------------------------------------------|-------------------------------------------------------------------------------------------------------------------------------------------------------------------------------------------------------------------------------------------------------------------------------------------------------------------------------------------------------------------------------------------------------------------------------------------------------------------------------------------------------|
| <b>AMR population-level dimensions considered</b>         | Amoxicillin-clavulanate rather than amoxicillin alone is recommended as empiric antimicrobial therapy for ABRS in adults (weak, low) (13).                                                                                                                                                                                                                                            | Local national surveillance data in the United States of America for amoxicillin and beta-lactamase-producing <i>H. influenzae</i> was narratively described in the evidence summary was clearly linked to the recommendation.                                                                                                                                                                                                                                                                        |
| <b>AMR outcome-level dimensions considered</b>            | <p>In neonates with gonococcal conjunctivitis, the WHO STI guideline suggests one of the following treatment options:</p> <ul style="list-style-type: none"> <li>• ceftriaxone 50 mg/kg (maximum 150 mg) IM as a single dose</li> <li>• kanamycin 25 mg/kg (maximum 75 mg) IM as a single dose</li> <li>• spectinomycin 25 mg/kg (maximum 75 mg) IM as a single dose (19).</li> </ul> | The outcome of ‘antimicrobial resistance’ was formally considered within a PICO framework within a supplementary appendix.                                                                                                                                                                                                                                                                                                                                                                            |
| <b>Population and outcome-level dimensions considered</b> | Bedaquiline should be included in longer MDR-TB regimens for patients aged 18 years or more (strong recommendation, moderate certainty in the estimates of effect) (20).                                                                                                                                                                                                              | The recommendation considers a multi-drug-resistant tuberculosis patients, and the outcome ‘acquisition (amplification) of drug resistance’ (21) was formally considered within a PICO framework provided within a supplementary appendix.                                                                                                                                                                                                                                                            |
|                                                           | Alternative first choice of antibiotics for adults aged 18 years and over with pharyngitis and a penicillin allergy or intolerance: Clarithromycin 250 mg to 500 mg twice a day for 5 days (22).                                                                                                                                                                                      | Summary of committee discussions show that population-level resistance data was considered: “based on evidence, clinical experience and resistance data, the committee agreed to recommend the following alternative first-choice antibiotics for use in penicillin allergy or for phenoxymethylpenicillin intolerance: clarithromycin or erythromycin (which is preferred in pregnancy)” (22). Additional formal outcome considerations include ‘antibiotic resistance’ in a supplementary appendix. |

1  
2  
3 We considered a guideline that reports information on any of the above dimensions in either the  
4 recommendation, accompanying evidence summaries, or PICO framework would be considered  
5 satisfactory. Whereas guidelines that generally discussed AMR as an issue, without linking  
6 information pertaining to AMR to each recommendation were considered unsatisfactory.  
7  
8  
9  
10  
11

12  
13 We assessed a guideline's quality using the Appraisal of Guidelines for Research and Evaluation  
14 (AGREE) II Instrument focusing on three relevant domains: a well-defined scope and purpose  
15 (domain one), rigorous development including a systematic search for evidence, transparent  
16 reporting of methods, links between evidence and recommendations, external review, and  
17 procedures for update (domain three), and editorial independence (domain six) (23). We defined  
18 acceptable quality as guidelines that scored 60% or greater in these three domains and allowed us  
19 to be inclusive (3).  
20  
21  
22  
23  
24  
25  
26  
27  
28  
29

30 We also abstracted information on values, resource use, equity, acceptability, and feasibility  
31 from guidelines that met our acceptability cut-off (i.e. 60%). Briefly, worldwide regions may  
32 differ in the accessibility of antimicrobials, the cultural view towards the use of antimicrobials,  
33 pharmaceutical costs, and health care structures. We selected these dimensions as the transparent  
34 reporting of these factors is essential: in appraising the evidence for antimicrobials, guideline  
35 developers should be aware of the breadth of implications of their recommendations when used  
36 by decision-makers (7, 10, 24, 25). Guidelines that ignore this wider agenda could provide  
37 narrow, misleading guidance.  
38  
39  
40  
41  
42  
43  
44  
45  
46  
47  
48  
49

## 50 DATA SYNTHESIS AND STATISTICAL ANALYSIS

51

52  
53 We conducted descriptive statistics at the guideline and recommendation level, using counts and  
54 proportions (95%CI). We calculated the mean (SD) for AGREE II scores by region. We also  
55  
56  
57  
58  
59  
60

1  
2  
3 compared the quality of guidelines from the WHO versus regional guidelines using scaled  
4  
5 domain scores, mean difference, and a two-sided t-test. We calculated the frequency of guideline  
6  
7 reporting of: values, resource use, equity, acceptability, and feasibility. All analyses were  
8  
9 conducted in Microsoft® Excel and R-studio (RStudio Team (2016). RStudio: Integrated  
10  
11 Development for R. RStudio, Inc., Boston, MA URL <http://www.rstudio.com/>).

12  
13  
14  
15  
16 The study protocol was registered in PROSPERO (registration CRD42020145235). This paper is  
17  
18 reported according to the Preferred Reporting Items for Systematic Review and Meta-analysis  
19  
20 (PRISMA) guidelines and internally funded by the Michael G. DeGroot Cochrane Canada and  
21  
22 McMaster GRADE centres.  
23

## 24 25 26 PATIENT AND PUBLIC INVOLVEMENT

27  
28 One of the authors is a patient with a rare disease affected by repeated infections and treatment  
29  
30 related issues of resistance to antimicrobials and was involved in aspects of the design and data  
31  
32 abstraction. We specifically looked for information about patient values and preferences and  
33  
34 included this in our review. However, we did not make any additional specific efforts to involve  
35  
36 the patient and public in other aspects of this systematic review.  
37  
38  
39  
40  
41  
42

## 43 **Results**

44  
45  
46 Our initial search identified 10,365 records. After screening, we retrieved 79 guidelines that had  
47  
48 at least one recommendation on antimicrobial selection: (n = 28 TB, n = 13 gonorrhoea, n = 38  
49  
50 respiratory tract infections). Of these, 78 guidelines had sufficient information for assessment —  
51  
52 one gonorrhoea guideline was excluded because we were unable to retrieve supplementary  
53  
54 materials (figure 1) (26).  
55  
56  
57  
58  
59  
60

## GUIDELINE RECOMMENDATIONS CONSIDERING AMR

After classifying recommendations, we found that 74 guidelines had at least one recommendation that considered AMR and four guidelines without such considerations (table 2) (27-30). These were excluded from further assessment. Of the 74 guidelines, the majority were developed in North America (n = 29), (13, 26, 31-58) and Europe (n = 26) (22, 48, 59-81). A smaller portion were from Asia (n = 7), (82-88) South America (n = 1), (89) Africa (n = 1), (90) and Oceania (n = 1) (91). Nine guidelines were internationally developed by the WHO (19-21, 92-97).

*Table 2: Guidelines and recommendations with treatment recommendations with AMR\* considerations*

| Variable                | Guidelines (N=78**) | Total number of recommendations (N=1198) | Number of recommendations with AMR consideration (N=808) | Proportion of recommendations with AMR consideration (95% CI) |
|-------------------------|---------------------|------------------------------------------|----------------------------------------------------------|---------------------------------------------------------------|
| <b>Continent</b>        |                     |                                          |                                                          |                                                               |
| International***        | 11                  | 93                                       | 72                                                       | 0.77 (0.67, 0.85)                                             |
| North America           | 29                  | 503                                      | 321                                                      | 0.64 (0.59, 0.68)                                             |
| South America           | 1                   | 26                                       | 7                                                        | 0.27 (0.12, 0.48)                                             |
| Europe                  | 27                  | 429                                      | 334                                                      | 0.78 (0.74, 0.82)                                             |
| Africa                  | 1                   | 24                                       | 8                                                        | 0.33 (0.16, 0.55)                                             |
| Asia                    | 8                   | 119                                      | 65                                                       | 0.55 (0.45, 0.64)                                             |
| Oceania                 | 1                   | 4                                        | 1                                                        | 0.25 (0.01, 0.78)                                             |
| <b>Publication year</b> |                     |                                          |                                                          |                                                               |
| 2007                    | 3                   | 47                                       | 34                                                       | 0.72 (0.57, 0.84)                                             |
| 2008                    | 2                   | 4                                        | 4                                                        | 1.00 (0.40, 1.00)                                             |
| 2009                    | 6                   | 175                                      | 92                                                       | 0.53 (0.45, 0.60)                                             |
| 2010                    | 3                   | 45                                       | 30                                                       | 0.67 (0.51, 0.80)                                             |
| 2011                    | 8                   | 77                                       | 64                                                       | 0.83 (0.72, 0.90)                                             |
| 2012                    | 10                  | 144                                      | 96                                                       | 0.67 (0.58, 0.74)                                             |
| 2013                    | 7                   | 121                                      | 93                                                       | 0.77 (0.68, 0.84)                                             |
| 2014                    | 5                   | 167                                      | 88                                                       | 0.53 (0.45, 0.60)                                             |
| 2015                    | 7                   | 37                                       | 35                                                       | 0.95 (0.80, 0.99)                                             |
| 2016                    | 10                  | 83                                       | 53                                                       | 0.64 (0.53, 0.74)                                             |
| 2017                    | 6                   | 129                                      | 94                                                       | 0.73 (0.64, 0.80)                                             |
| 2018                    | 5                   | 49                                       | 45                                                       | 0.92 (0.80, 0.97)                                             |
| 2019                    | 6                   | 120                                      | 80                                                       | 0.67 (0.57, 0.75)                                             |

\*AMR = Antibiotic resistance. \*\* 4/78 CPGs did not have recommendations that considered resistance

\*\*\*International= World Health Organization



1  
2  
3  
4 Within these 74 guidelines, we found that approximately two thirds of recommendations (n =  
5 808/1198) considered AMR; that figure was 55·2% for TB recommendations (n = 272), 84·7%  
6  
7 for gonorrhoea recommendations (n = 150), and 73·1% for respiratory tract infection  
8  
9 recommendations (n = 386). The majority of recommendations were regionally developed (n =  
10  
11 736) (figure 2).  
12  
13  
14

15  
16  
17 Most recommendations considered either population-level or outcome-level AMR dimensions,  
18  
19 while fewer considered both simultaneously. Approximately 17·6% of recommendations (n =  
20  
21 142/808) considered AMR at the population-level only while 34·7% (n = 281/808) of  
22  
23 recommendations considered resistance as an outcome only. Most notably, a majority of those  
24  
25 considering AMR as an outcome were not explicitly stated in PICO format, but rather buried  
26  
27 within evidence summaries. Clearly stated outcomes formally considered in PICO frameworks  
28  
29 included: ‘acquired drug-resistance’, ‘antimicrobial in vitro resistance’, ‘bacterial antibiotic  
30  
31 resistance’, and ‘emergence of drug-resistance’. Among respiratory tract infection  
32  
33 recommendations, 6·9% (n = 27/386) recommended no antimicrobial or back-up antimicrobial  
34  
35 (i.e. the watchful waiting approach), which is a population-level dimension, e.g.  
36  
37  
38  
39  
40 recommendations for patients who likely have infections that are viral in nature or self-limiting.  
41  
42

43  
44 Additionally, 47·6% (385/808) recommendations considered both population-level and outcome-  
45  
46 level AMR dimensions simultaneously. For example, fully immunized infant or school-aged  
47  
48 children with community-acquired pneumonia admitted to hospital are recommended to take  
49  
50 ampicillin or penicillin G given that local epidemiologic data lacks a substantial high-level of  
51  
52 penicillin-resistance for invasive *S. pneumoniae* (37). This recommendation is considering local  
53  
54 resistance patterns (population-level dimension). It is also followed by an evidence summary the  
55  
56  
57  
58  
59  
60

explains that lower costs of ampicillin or penicillin G need to be balanced by the increased possibility of emergence of resistance (outcome-level dimension) that may occur from prescribing a broad-spectrum antimicrobial. About 22.5% (n = 182/808) of recommendations considered local resistance patterns in a similar manner.

### CREDIBILITY OF INTERNATIONAL AND REGIONAL GUIDELINES WITH RECOMMENDATIONS THAT CONSIDER AMR

Overall, only 39.2% (n = 29/74) of all international and regional guidelines had scores of 60% or greater in scope and purpose, rigour of development, and editorial independence. Of the 29 guidelines that met our credibility cut-off, 10 were developed in North America (13, 38-43, 46, 57, 98), 9 in Europe (22, 48, 67, 70, 71, 75-78, 90), and 2 were developed in Asia (83, 85). When we compared international and regional guidelines, the majority of WHO guidelines performed significantly better than regional guidelines (table 3). Guidelines that did not meet our credibility cut-off score and excluded from further assessment included: nineteen from North America, seventeen from Europe, five from Asia, and three guidelines from South America, Africa, and Oceania.

**Table 3: Performance of World Health Organization versus regional PGs with AMR considerations**

| AGREE II scores                       | World Health Organization PGs (N=9) | Regional PGs (N=65) | Mean difference (95%CI) | P     |
|---------------------------------------|-------------------------------------|---------------------|-------------------------|-------|
| <b>Domain 1: Scope and purpose</b>    |                                     |                     |                         |       |
| Mean domain score (SD) as %           | 89(13)                              | 71(22)              | -18 (-0.28, -0.06)      | 0.004 |
| Score range as %                      | 69–100                              | 17–100              |                         |       |
| Scored 60% or greater as % (n)        | 100 (n = 9)                         | 68 (n = 44)         |                         |       |
| <b>Domain 3: Rigor of development</b> |                                     |                     |                         |       |
| Mean domain score (SD) as %           | 81(24)                              | 51(23)              | -30 (-0.50, -0.11)      | 0.005 |
| Score range as %                      | 20–99                               | 6–98                |                         |       |
| Scored 60% or greater as % (n)        | 89 (n = 8)                          | 37 (n = 24)         |                         |       |

| <i>Domain 6: Editorial independence</i> |            |             |                    |       |
|-----------------------------------------|------------|-------------|--------------------|-------|
| Mean domain score (SD) as %             | 88(20)     | 56(30)      | -32 (-0.48, -0.15) | 0.001 |
| Score range as %                        | 38–100     | 0–100       |                    |       |
| Scored 60% or greater as % (n)          | 89 (n = 8) | 49 (n = 32) |                    |       |

SD: standard deviation

AMR: antimicrobial resistance

P: p-value

AGREE II: Appraisal for Guidelines Research and Evaluation II

## GUIDELINES CONSIDERING VALUES, RESOURCE USE, ACCEPTABILITY, FEASIBILITY, AND EQUITY

Only 5 (19, 20, 93, 94, 96) of the 29 guidelines reported all factors required for contextualization: values, resource use, equity, acceptability, and feasibility. The WHO was the only guideline developer to report on all five criteria in four TB guidelines and one gonorrhoea guideline.

Across all 29 guidelines, resource use was the most frequently considered (n = 23 guidelines), followed by values (n = 16 guidelines), acceptability (n = 12 guidelines), and feasibility (n = 12 guidelines). Equity was the least considered factor with only seven guidelines that made such considerations (figure 3): two were regionally and five were internationally developed. The WHO, the National Institute for Health and Care Excellence (NICE), and the United States Preventative Task Force (USPSTF) were the only organizations to consider equity.

Regional guidelines tended to consider values, resource use, equity, acceptability, and feasibility less than internationally developed guidelines. Most regional guidelines considered one (n = 6/21) or two (n = 6/21) or three (n = 4/21) or none (n = 4/21) of the above contextual factors. Values and resource use were considered the most, while equity, acceptability, and feasibility were less considered in regionally developed guidelines (figure 4).

## Discussion

### SUMMARY OF FINDINGS

Over a 13-year period, relatively few guidelines on antibiotics for highly prevalent infectious diseases included AMR considerations. Approximately 60% of regionally developed guidelines were of low quality, and tended to report less factors for contextualization of recommendations. International WHO guidelines had quality scores that were substantially better than regional guidelines. International guidelines also consistently considered important information required for developing recommendations that are appropriate for specific contexts compared to regional guidelines.

The compliance of recommendations to consider contextual factors is often unsatisfactory despite the emerging consensus that the reporting of Evidence to Decision dimensions is ethically and scientifically essential. Some of the proposed criteria seemed to be adopted by guideline developers (i.e. values and resource use), while others were less so: guideline quality was variable among guidelines and there were inconsistencies between regions and guidelines promoted/sponsored by different entities.

Frameworks including the GRADE Evidence to Decision and its use by the WHO and NICE, seem to positively influence the consideration of contextual factors in the guidelines we reviewed. A high proportion of WHO and NICE guidelines contained complete information necessary to provide optimal guidance on how to use antimicrobials in the considered syndromes addressing contextual factors.

### STRENGTHS AND LIMITATIONS

1  
2  
3 Our work has strengths. To our knowledge, this is the first study to assess the extent to which  
4 guidelines are considering local dimensions such as AMR, and to use established frameworks:  
5 AGREE II, and GRADE Evidence to Decision. We also employed systematic methods to  
6  
7  
8  
9  
10 conduct our review and validated tools to measure the quality of guidelines (23, 99).  
11

12  
13 There are several limitations to our study. The use of the credibility cut-off score of 60% or  
14  
15 greater for three of the six AGREE II domains is based on limited guidance on cut-off  
16  
17 thresholds, but by focusing on three domains and a relatively low score we were more inclusive  
18  
19 (3, 100). We used criteria of the GRADE Evidence to Decision Frameworks that are fairly  
20  
21 general as they apply to any interventions. These dimensions could be complemented with  
22  
23 specific criteria related to the antimicrobial field. For example, providing guidance on the  
24  
25 appropriate threshold for escalating empiric guidance from narrower spectrum agents to broader  
26  
27 spectrum agents. In other words, the real test for antimicrobial guidelines may be whether they  
28  
29 facilitate making the potential implications of antimicrobial prescribing on resistance fully  
30  
31 considered by prescribers and the public. This would lead to virtuous and parsimonious  
32  
33 prescribing and consumption habits.  
34  
35  
36  
37  
38

#### 39 CONTEXT TO OTHER RESEARCH 40

41  
42  
43 We previously found that about two thirds of respiratory tract infection recommendations on  
44  
45 empirical antimicrobial use did not consider country-specific resistance patterns. The use of a  
46  
47 broader framework and additional focus areas may have resulted in the larger number of  
48  
49 recommendations that considered AMR uncovered by this study. Both studies support that there  
50  
51 are inconsistencies in considering AMR in recommendation development and potential  
52  
53 duplication of work among infectious disease guidelines.  
54  
55  
56  
57  
58  
59  
60

## IMPLICATIONS FOR PRACTICE

There are several implications for guideline developers. Given the suboptimal quality of guidelines in our sample, guideline methodology should improve particularly when recommendations move from global to regional levels. This includes improving the processes used in evidence syntheses and recommendation formulation, transparency, and addressing potential undue biases with competing interests. As far as regional guidelines need to incorporate contextual information when developing their recommendations, global guidelines need to provide information about how to contextualize recommendations for appropriate AMR considerations.

Guideline development can be done more efficiently and economically by using work done by other developers including the WHO. Rather developing guidelines from scratch, time and resources (101) may be shifted towards refining AMR surveillance systems that provide national resistance data to support recommendations and appropriate antimicrobial use. Further, country-level participation of the Global Antimicrobial Resistance Surveillance System (GLASS) supports global monitoring of resistance trends, emerging resistance, and the ability to evaluate the effectiveness of interventions (102). As of 2020, 94 countries are participating in GLASS (102). However, some countries lack public health infrastructure, national laboratory capacities, and data management which is essential for surveillance systems (6, 103). In 2018, there was at least one country within each WHO regions with the ability to collect national resistance data (103). Regions facing unique challenges to antimicrobial stewardship capacities, may look to recommendations developed by other regions with similar resistance experiences. Finally, as new antimicrobial therapies become available, and the scientific community cumulates more

1  
2  
3 evidence on resistance patterns and their implications for local prescribing, future infectious  
4  
5 disease guidelines may require more frequent updating.  
6  
7

## 8 9 IMPLICATIONS FOR RESEARCH

10  
11  
12 Although we focused on recommendations on antimicrobial selection and prescribing, there are  
13  
14 many other approaches that could be assessed in future research (e.g. rapid diagnostics to rule-  
15  
16 out viral infections and resistant strains). In addition, research should also explore whether  
17  
18 recommendations are appropriately guided by evidence, resistance data, and the WHO's  
19  
20 Essential Medicines List and AWaRe Classification Database of Antimicrobials updates (104).  
21  
22 With regards to contextualization of infectious disease recommendations, we have developed  
23  
24 transparent recommendation maps that facilitate use of recommendations across jurisdictions for  
25  
26 TB (<https://tuberculosis.evidenceprime.com/>) and COVID-19  
27  
28 (<https://covid19.evidenceprime.com/>) where we apply some of our findings.  
29  
30  
31  
32  
33

## 34 **Conclusion (word count: 69)**

35  
36  
37 Our study offers information on how current infectious disease guidelines are considering  
38  
39 contextual factors necessary to appropriately prescribe antimicrobials. We also present  
40  
41 dimensions that can be considered by a formal AMR framework used in combination with  
42  
43 GRADE Evidence to Decision Frameworks to facilitate amelioration of the cornerstones that are  
44  
45 guiding current antimicrobial use. This may preserve the remaining and essential medicines we  
46  
47 have left, and the future of new classes of antimicrobials (105).  
48  
49  
50  
51  
52  
53  
54  
55  
56  
57  
58  
59  
60

## Contributors

RS, HJS, NS, ML, and TP designed the study protocol. RS coordinated the study. RS, AB, AD, GPM, MV, SK, and TB assessed eligibility of records at title and abstract. RS, AD, and MV searched for unpublished guidelines in key websites. RS, AB, AD, GPM, MV, and SK assessed eligibility of full text articles. RS, AB, AD, FS, GPM, MV, and SK extracted data and performed quality assessment using the AGREE II tool. NS and HJS settled disputes. RS analyzed and interpreted the data with HJS, NS, and ML. RS and HJS drafted the manuscript, with writing contributions from NS, ML, and LM. All authors interpreted and make edits to the manuscript.

## Acknowledgments

This work was supported by the Michael G. DeGroot Canada and McMaster GRADE centres. We would like to thank biostatistician Dr. Thuva Vanniyasingam for assisting with developing an analysis plan for our protocol.

## Competing interests

We declare no competing interests. Drs. Loeb and Schünemann report personal fees or research support from the World Health Organization, outside of this research.

## Funding

Michael G. DeGroot Cochrane Canada and McMaster GRADE centres.

## References

1. United Nations meeting on antimicrobial resistance. Bull World Health Organ. 2016;94(9):638-9.
2. Organization WH. Global Action Plan on Antimicrobial Resistance. Geneva; 2015. Report No.: ISBN 978 92 4 150976 3.



- 1
- 2
- 3 3. Johnston A, Kelly SE, Hsieh S-C, Skidmore B, Wells GA. Systematic reviews of clinical
- 4 practice guidelines: a methodological guide. *Journal of Clinical Epidemiology*. 2019;108:64-76.
- 5 4. Canada PHAo. Tackling Antimicrobial Resistance and Antimicrobial Use: A Pan-
- 6 Canadian Framework for Action. Canada; 2017. Report No.: ISBN: 978-0-660-08168-7.
- 7 5. Anderson M, Schulze K, Cassini A, Plachouras D, Mossialos E. A governance
- 8 framework for development and assessment of national action plans on antimicrobial resistance.
- 9 *Lancet Infect Dis*. 2019;19(11):e371-e84. doi: 10.1016/S1473-3099(19)30415-3. Epub 2019 Oct
- 10 3.
- 11 6. Elias C, Moja L, Mertz D, Loeb M, Forte G, Magrini N. Guideline recommendations and
- 12 antimicrobial resistance: the need for a change. *BMJ Open*. 2017;7(7):e016264. doi:
- 13 10.1136/bmjopen-2017-.
- 14 7. Schünemann HJ, Wiercioch W, Brozek J, Etzeandía-Ikobaltzeta I, Mustafa RA, Manja V,
- 15 et al. GRADE Evidence to Decision (EtD) frameworks for adoption, adaptation, and de novo
- 16 development of trustworthy recommendations: GRADE-ADOLPMENT. *J Clin Epidemiol*.
- 17 2017;81:101-110.(doi):10.1016/j.jclinepi.2016.09.009. Epub Oct 3.
- 18 8. Andrews J, Guyatt G, Oxman AD, Alderson P, Dahm P, Falck-Ytter Y, et al. GRADE
- 19 guidelines: 14. Going from evidence to recommendations: the significance and presentation of
- 20 recommendations. *J Clin Epidemiol*. 2013;66(7):719-25. doi: 10.1016/j.jclinepi.2012.03.013.
- 21 Epub 3 Jan 9.
- 22 9. Rzewuska M, Duncan EM, Francis JJ, Morris AM, Suh KN, Davey PG, et al. Barriers
- 23 and Facilitators to Implementation of Antibiotic Stewardship Programmes in Hospitals in
- 24 Developed Countries: Insights From Transnational Studies. *Frontiers in Sociology*. 2020;5(41).
- 25 10. Scott IA, Guyatt GH. Clinical practice guidelines: the need for greater transparency in
- 26 formulating recommendations. *Med J Aust*. 2011;195(1):29-33.
- 27 11. O'Neill J. Tackling Drug-Resistant Infections Globally: Final Report and
- 28 Recommendations. London; 2016.
- 29 12. CDC. Antibiotic Resistance Threats in the United States, 2019. Atlanta, GA; 2019.
- 30 13. Chow AWB, M. S.; Brook, I.; Brozek, J. L.; Goldstein, E. J. C.; Hicks, L. A.; Pankey, G.
- 31 A.; Seleznick, M.; Volturo, G.; Wald, E. R.; File, T. M. IDSA clinical practice guideline for
- 32 acute bacterial rhinosinusitis in children and adults. *Clinical Infectious Diseases*. 2012;54(8):e72-
- 33 e112.
- 34 14. Guidelines IoMUCoSfDTCP. Clinical Practice Guidelines We Can Trust. Washington
- 35 (DC): National Academies Press (US); 2011. Available from:
- 36 <https://www.ncbi.nlm.nih.gov/books/NBK209539/?report=classic>.
- 37 15. Knowles R, Sharland M, Hsia Y, Magrini N, Moja L, Siyam A, et al. Measuring
- 38 antibiotic availability and use in 20 low- and middle-income countries. *Bull World Health*
- 39 *Organ*. 2020;98(3):177-87C.
- 40 16. Knowles R, Sharland M, Hsia Y, Magrini N, Moja L, Siyam A, et al. Measuring
- 41 antibiotic availability and use in 20 low- and middle-income countries. *Bull World Health*
- 42 *Organ*. 2020;98(3):177-87C.
- 43 17. Sharland M, Gandra S, Huttner B, Moja L, Pulcini C, Zeng M, et al. Encouraging
- 44 AWaRe-ness and discouraging inappropriate antibiotic use-the new 2019 Essential Medicines
- 45 List becomes a global antibiotic stewardship tool. *Lancet Infect Dis*. 2019;19(12):1278-80. doi:
- 46 10.1016/S1473-3099(19)30532-8.
- 47 18. Schünemann HJ, Hill SR, Kakad M, Vist GE, Bellamy R, Stockman L, et al. Transparent
- 48 development of the WHO rapid advice guidelines. *PLoS Med*. 2007;4(5):e119-e.
- 49
- 50
- 51
- 52
- 53
- 54
- 55
- 56
- 57
- 58
- 59
- 60

19. WHO guidelines for the treatment of Neisseria gonorrhoeae. World Health Organisation Guidelines. 2016.
20. Anonymous. WHO consolidated guidelines on drug-resistant tuberculosis treatment World Health Organization. 2019.
21. Improving the diagnosis and treatment of smear-negative pulmonary and extrapulmonary tuberculosis among adults and adolescents. Recommendations for HIV-prevalent and resource-constrained settings. World Health Organization. 2007.
22. AHRQ - Agency for Healthcare Research + Quality. Surgical management of otitis media with effusion in children. National Collaborating Centre for Women's and Children's Health. NGC:007182 [Guideline Clearing Report]. 2008 [Available from: [http://guidelines.gov/summary/summary.aspx?doc\\_id=14314&nbr=7182](http://guidelines.gov/summary/summary.aspx?doc_id=14314&nbr=7182)].
23. Brouwers MC, Kerkvliet K, Spithoff K. The AGREE Reporting Checklist: a tool to improve reporting of clinical practice guidelines. *BMJ*. 2016;352:i1152.
24. Moberg J, Oxman AD, Rosenbaum S, Schünemann HJ, Guyatt G, Flottorp S, et al. The GRADE Evidence to Decision (EtD) framework for health system and public health decisions. *Health Research Policy and Systems*. 2018;16(1):45.
25. Alonso-Coello P, Schünemann HJ, Moberg J, Brignardello-Petersen R, Akl EA, Davoli M, et al. GRADE Evidence to Decision (EtD) frameworks: a systematic and transparent approach to making well informed healthcare choices. 1: Introduction. *BMJ*. 2016;353:i2016.
26. Ontario PH. Ontario Gonorrhea Testing and Treatment Guide, 2nd Edition. 2018.
27. Organization WH. THE USE OF ANTIRETROVIRAL DRUGS FOR TREATING AND PREVENTING HIV INFECTION. 2016.
28. Kawaguchi RM, K.; Akira, S.; Ishitani, K.; Iwasaku, K.; Ueda, Y.; Okagaki, R.; Okano, H.; Oki, T.; Koga, K.; Kido, M.; Kurabayashi, T.; Kuribayashi, Y.; Sato, Y.; Shiina, K.; Takai, Y.; Tanimura, S.; Chaki, O.; Terauchi, M.; Todo, Y.; Noguchi, Y.; Nose-Ogura, S.; Baba, T.; Hirasawa, A.; Fujii, T.; Maruyama, T.; Miyagi, E.; Yanagida, K.; Yoshino, O.; Iwashita, M.; Maeda, T.; Minegishi, T.; Kobayashi, H. Guidelines for office gynecology in Japan: Japan Society of Obstetrics and Gynecology (JSOG) and Japan Association of Obstetricians and Gynecologists (JAOG) 2017 edition. *Journal of Obstetrics and Gynaecology Research*. 2019;45(4):766-86.
29. Anonymous. Recommendations for investigating contacts of persons with infectious tuberculosis in low- and middle-income countries. World Health Organization. 2012.
30. Di Comite AE, S.; Villani, A.; Stronati, M.; Italian Pediatric, T. B. Study Group. How to manage neonatal tuberculosis. *J Perinatol*. 2016;36(2):80-5.
31. Prevention CfDCA. Provisional CDC guidelines for the use and safety monitoring of bedaquiline fumarate (Sirturo) for the treatment of multidrug-resistant tuberculosis. Article. Atlanta; 2013 Oct 2013. Contract No.: 9.
32. Wald ERA, K. E.; Bordley, C.; Darrow, D. H.; Glode, M. P.; Marcy, S. M.; Nelson, C. E.; Rosenfeld, R. M.; Shaikh, N.; Smith, M. J.; Williams, P. V.; Weinberg, S. T. Clinical practice guideline for the diagnosis and management of acute bacterial sinusitis in children aged 1 to 18 years. *Pediatrics*. 2013;132(1):e262-e80.
33. Workowski KAB, G. A. Sexually transmitted diseases treatment guidelines, 2015. Article. Atlanta, Georgia; 2015 Jun 2015.
34. Desrosiers ME, G. A.; Keith, P. K.; Wright, E. D.; Kaplan, A.; Bouchard, J.; Ciavarella, A.; Doyle, P. W.; Javer, A. R.; Leith, E. S.; Mukherji, A.; Schellenberg, R. R.; Small, P.;

- 1  
2  
3 Witterick, I. J. Canadian clinical practice guidelines for acute and chronic rhinosinusitis. *Allergy, Asthma and Clinical Immunology*. 2011;7(1).
- 4  
5 35. Mayor MTR, M. A.; Uduhiri, K. A. Diagnosis and management of gonococcal infections. *Am Fam Physician*. 2012;86(10):931-8.
- 6  
7 36. Kaplan JEB, C.; Holmes, K. H.; Brooks, J. T.; Pau, A.; Masur, H. Guidelines for  
8 prevention and treatment of opportunistic infections in HIV-infected adults and adolescents:  
9 recommendations from CDC, the National Institutes of Health, and the HIV Medicine  
10 Association of the Infectious Diseases Society of America. *MMWR*. 2009;Recommendations  
11 and reports:Morbidity and mortality weekly report. Recommendations and reports / Centers for  
12 Disease Control. 58 (RR-4) (pp 1-207; quiz CE1-2074).
- 13  
14 37. The Management of Community-Acquired Pneumonia in Infants and Children Older  
15 Than 3 Months of Age. *Infectious Diseases Society of America*. 2011.
- 16  
17 38. Diagnosis and Management of Acute Otitis Media. *American Academy of Family*  
18 *Physicians*. 2013.
- 19  
20 39. Adult Sinusitis. *American Academy of Otolaryngology - Head and Neck Surgery*. 2015.
- 21  
22 40. Otitis Media with Effusion (OME). *American Academy of Otolaryngology - Head and*  
23 *Neck Surgery*. 2016.
- 24  
25 41. Treatment of Drug-Susceptible Tuberculosis: Official ATS/CDC/IDSA Clinical Practice  
26 *Guidelines*. *American Thoracic Society*. 2016.
- 27  
28 42. Respiratory Illness in Children and Adults, Diagnosis and Treatment of. *Institute for*  
29 *Clinical Systems Improvement*. 2017.
- 30  
31 43. IDSA - Infectious Diseases Society of America. Clinical Practice Guideline for the  
32 Diagnosis and Management of Group A Streptococcal Pharyngitis: 2012 Update by the  
33 Infectious Diseases Society of America [Guideline]. 2012 [Available from:  
34 <http://cid.oxfordjournals.org/content/early/2012/09/06/cid.cis629.full>].
- 35  
36 44. Borisov ASBM, S.; Njie, G. J.; Winston, C. A.; Burton, D.; Goldberg, S.; Yelk  
37 Woodruff, R.; Allen, L.; LoBue, P.; Vernon, A. Update of Recommendations for Use of Once-  
38 Weekly Isoniazid-Rifapentine Regimen to Treat Latent Mycobacterium tuberculosis Infection.  
39 *MMWR Morbidity and mortality weekly report*. 2018;67(25):723-6.
- 40  
41 45. Pogany LR, B.; Robinson, J.; Gale-Rowe, M.; Latham-Carmanico, C.; Weir, C.; Wong,  
42 T. Management of gonococcal infection among adults and youth: New key recommendations.  
43 *Canadian Family Physician*. 2015;61(10):869-73.
- 44  
45 46. Richard M. Rosenfeld M, MPH1, Jay F. Piccirillo, MD2,, Sujana S. Chandrasekhar M,  
46 Itzhak Brook, MD, MSc4, Kaparaboyana Ashok Kumar, MD, FRCS5, Maggie Kramper, RN,  
47 FNP6, Richard R. Orlandi, MD7, James N. Palmer, MD8, Zara M. Patel, MD9, Anju Peters,  
48 MD10, Sandra A. Walsh11, and Maureen D. Corrigan. Clinical Practice Guideline (Update):  
49 Adult Sinusitis. 2015.
- 50  
51 47. Report MaMW. Guidelines for the Prevention and Treatment of Opportunistic Infections  
52 Among HIV-Exposed and HIV-Infected Children. 2009.
- 53  
54 48. Canada PHAo. Canadian Tuberculosis Standards, 7th Edition. 2014.
- 55  
56 49. Control BCfD. Sexually Transmitted Infections in Adolescents and Adults 2014.
- 57  
58 50. Prevention CfDca. Guidelines for the Prevention and Treatment of Opportunistic  
59 Infections in Adults and Adolescents with HIV. 2019.
- 60  
61 51. America IDSo. Clinical Practice Guidelines by the Infectious Diseases Society of  
62 America for the Treatment of Methicillin- Resistant Staphylococcus aureus Infections in Adults  
63 and Children. 2011.

- 1
- 2
- 3
- 4 52. Infections CGoST. Gonococcal Infections Chapter. 2013.
- 5 53. Prevention CfDCA. Guidelines for the Prevention and Treatment of Opportunistic  
6 Infections in HIV-Exposed and HIV-Infected Children. 2013.
- 7 54. Pharyngitis. University of Michigan Health System. 2013.
- 8 55. HIV/AIDS BCCfEi. Therapeutic guidelines for antiretroviral (ARV) treatment in adult  
9 HIV infection. 2015.
- 10 56. Mandell LAW, R. G.; Anzueto, A.; Bartlett, J. G.; Campbell, G. D.; Dean, N. C.; Dowell,  
11 S. F.; File Jr, T. M.; Musher, D. M.; Niederman, M. S.; Torres, A.; Whitney, C. G. Infectious  
12 Diseases Society of America/American Thoracic Society Consensus Guidelines on the  
13 management of community-acquired pneumonia in adults. *Clinical Infectious Diseases*.  
14 2007;44(SUPPL. 2):S27-S72.
- 15 57. Ocular Prophylaxis for Gonococcal Ophthalmia Neonatorum: Preventive Medication. US  
16 Preventive Services Task Force. 2019.
- 17 58. Jereb JAG, S. V.; Powell, K.; Villarino, M. E.; Lobue, P. Recommendations for use of an  
18 isoniazid-rifapentine regimen with direct observation to treat latent mycobacterium tuberculosis  
19 infection. *Morbidity and Mortality Weekly Report*. 1650;60(48):1650-3.
- 20 59. Bignell CU, M. 2012 European guideline on the diagnosis and treatment of gonorrhoea in  
21 adults. *International Journal of STD and AIDS*. 2013;24(2):85-92.
- 22 60. Bignell CF, M. UK national guideline for the management of gonorrhoea in adults, 2011.  
23 *International Journal of STD and AIDS*. 2011;22(10):541-7.
- 24 61. Harris MC, J.; Coote, N.; Fletcher, P.; Harnden, A.; McKean, M.; Thomson, A. British  
25 Thoracic Society guidelines for the management of community acquired pneumonia in children:  
26 Update 2011. *Thorax*. 2011;66(SUPPL. 2).
- 27 62. Migliori GBZ, J. P.; Abubakar, I.; Ibraim, E.; Caminero, J. A.; De Vries, G.; D'Ambrosio,  
28 L.; Centis, R.; Sotgiu, G.; Menegale, O.; Kliiman, K.; Aksamit, T.; Cirillo, D. M.; Danilovits,  
29 M.; Dara, M.; Dheda, K.; Dinh-Xuan, A. T.; Kluge, H.; Lange, C.; Leimane, V.; Loddenkemper,  
30 R.; Nicod, L. P.; Raviglione, M. C.; Spanevello, A.; Thomsen, V. O.; Villar, M.; Wanlin, M.;  
31 Wedzicha, J. A.; Zumla, A.; Blasi, F.; Huitric, E.; Sandgren, A.; Manissero, D. European Union  
32 Standards for Tuberculosis Care. *European Respiratory Journal*. 2012;39(4):807-19.
- 33 63. Woodhead MB, F.; Ewig, S.; Garau, J.; Huchon, G.; Ieven, M.; Ortqvist, A.; Schaberg,  
34 T.; Torres, A.; Van Der Heijden, G.; Read, R.; Verheij, T. J. M. Guidelines for the management  
35 of adult lower respiratory tract infections - Full version. *Clinical Microbiology and Infection*.  
36 2011;17(SUPPL. 6):E1-E59.
- 37 64. Spindler CS, K.; Eriksson, L.; Hjerdt-Goscinski, G.; Holmberg, H.; Lidman, C.; Nilsson,  
38 A.; Ortqvist, A.; Hedlund, J. Swedish guidelines on the management of community-acquired  
39 pneumonia in immunocompetent adults - Swedish Society of Infectious Diseases 2012.  
40 *Scandinavian Journal of Infectious Diseases*. 2012;44(12):885-902.
- 41 65. Thwaites GF, M.; Hemingway, C.; Scott, G.; Solomon, T.; Innes, J.; British Infection,  
42 Society. British Infection Society guidelines for the diagnosis and treatment of tuberculosis of  
43 the central nervous system in adults and children. *J Infect*. 2009;59(3):167-87.
- 44 66. Bignell CIW. 2009 European (IUSTI/WHO) guideline on the diagnosis and treatment of  
45 gonorrhoea in adults. *Int J STD AIDS*. 2009;20(7):453-7.
- 46 67. Internal Clinical Guidelines T. Tuberculosis Prevention, diagnosis, management and  
47 service organization. National Institute for Health and Care Excellence (UK). 2016;01:01.
- 48
- 49
- 50
- 51
- 52
- 53
- 54
- 55
- 56
- 57
- 58
- 59

68. Menendez RT, A.; Aspa, J.; Capelastegui, A.; Prat, C.; Rodriguez de Castro, F. Community acquired pneumonia. New guidelines of the Spanish society of chest diseases and thoracic surgery (SEPAR). *Archivos de Bronconeumologia*. 2010;46(10):543-58.
69. Respiratory tract infections (self-limiting): prescribing antibiotics. National Institute for Health and Clinical Excellence - Clinical Guidelines. 2008.
70. Guidelines for the management of community-acquired pneumonia in adults. British Infection Association. 2009.
71. CPG on the Diagnosis, Treatment and Prevention of Tuberculosis. *GuiaSalud*. 2010.
72. Sinusitis (acute): antimicrobial prescribing. National Institute for Health and Clinical Excellence - Clinical Guidelines. 2017.
73. British Association for Sexual Health and HIV national guideline for the management of infection with *Neisseria gonorrhoeae*. British Association for Sexual Health and HIV. 2019.
74. Stahl JPA, P.; Bruneel, F.; De Broucker, T.; Duval, X.; Fantin, B.; Girard, N.; Herrmann, J. L.; Honnorat, J.; Lecuit, M.; Mailles, A.; Martinez-Almoyna, L.; Morand, P.; Piroth, L.; Tattevin, P. Guidelines on the management of infectious encephalitis in adults. *Medecine et Maladies Infectieuses*. 2017;47(3):179-94.
75. Heidemann CL, J; Berg, J; Christensen, JJ; Håkonsen, SJ; Jakobsen, M; Johansen, CJ; Nielsen, LH; Hansen, MP; Poulsen, A; Schousboe, LP; Skrubbeltrang, C; Vind, AB; Homøe, P. Danish guidelines on management of otitis media in preschool children. 2016.
76. Management of sore throat and indications for tonsillectomy. *SIGN*. 2010.
77. Excellence ENIfHaC. Sore throat (acute): antimicrobial prescribing. 2018.
78. Excellence NIfHaC. Pneumonia (community-acquired): antimicrobial prescribing. 2019.
79. Wiersinga WJB, M. J.; Boersma, W. G.; Jonkers, R. E.; Aleva, R. M.; Kullberg, B. J.; Schouten, J. A.; Degener, J. E.; van de Garde, E. M. W.; Verheij, T. J.; Sachs, A. P. E.; Prins, J. M. Management of community-acquired pneumonia in adults: 2016 guideline update from the dutch working party on antibiotic policy (SWAB) and dutch association of chest physicians (NVALT). *Netherlands Journal of Medicine*. 2018;76(1):4-13.
80. Athlin SL, C.; Lundqvist, A.; Naucner, P.; Nilsson, A. C.; Spindler, C.; Stralin, K.; Hedlund, J. Management of community-acquired pneumonia in immunocompetent adults: updated Swedish guidelines 2017. *Infectious Diseases*. 2018;50(4):247-72.
81. Chiappini EM, R.; Bruzzese, E.; Capuano, A.; Colombo, M.; Cricelli, C.; Di Mauro, G.; Esposito, S.; Festini, F.; Guarino, A.; Miniello, V. L.; Principi, N.; Marchisio, P.; Rafaniello, C.; Rossi, F.; Sportiello, L.; Tancredi, F.; Venturini, E.; Galli, L.; de Martino, M. Rational use of antibiotics for the management of children's respiratory tract infections in the ambulatory setting: An evidence-based consensus by the Italian Society of Preventive and Social Pediatrics. *Paediatric Respiratory Reviews*. 2014;15(3):231-6.
82. Gupta DA, R.; Aggarwal, A.; Singh, N.; Mishra, N.; Khilnani, G.; Samaria, J.; Gaur, S.; Jindal, S. Guidelines for diagnosis and management of community-and hospital-acquired pneumonia in adults: Joint ICS/NCCP(I) recommendations. *Lung India*. 2012;29(SUPPL.2):S27-S62.
83. Abdul Rahaman JAK, H. B.; Yusof, M.; Hanafi, N. S.; Wong, J. L. Tuberculosis in adults. *Malays Fam Physician*. 2014;9(3):34-7.
84. Ministry of Public Health/Qatar. Community acquired pneumonia [Guideline]. 2016 [updated 19.03.2017. Available from: <https://www.moph.gov.qa/health-strategies/Documents/Guidelines/MOPH%20Guideline%20-%20Community%20acquired%20pneumonia%20v2-1%20FINAL.pdf>.

- 1  
2  
3 85. HTA DoH - HTA Unit, Ministry of Health,, Malaysia,, Management of Otitis Media with  
4 Effusion in Children [Guideline]. 2012 [Available from:  
5 <http://www.moh.gov.my/attachments/7779.pdf>.  
6  
7 86. Lee MSO, J. Y.; Kang, C. I.; Kim, E. S.; Park, S.; Rhee, C. K.; Jung, J. Y.; Jo, K. W.;  
8 Heo, E. Y.; Park, D. A.; Suh, G. Y.; Kiem, S. Guideline for antibiotic use in adults with  
9 community-acquired pneumonia. *Infection and Chemotherapy*. 2018;50(2):160-98.  
10 87. Singapore MoH. Prevention, Diagnosis and Management of Tuberculosis. 2016.  
11 88. WORKING ZAM-YMA-QAA-AMS-MSNATGC. Management and Prevention  
12 Strategies for Community-Acquired Pneumonia in the Gulf Corporation Council. *Journal of*  
13 *Chemotherapy*. 2007.  
14 89. Ricardo de Amorim Corrêa FLCL, Jorge Luiz Pereira-Silva, Rodney Luiz Frare e Silva,  
15 Alexandre Pinto Cardoso, Antônio Carlos Moreira Lemos, Flávia Rossi, Gustavo Michel, Liany  
16 Ribeiro, Manuela Araújo de Nóbrega Cavalcanti, Mara Rúbia Fernandes de Figueiredo, Marcelo  
17 Alcântara Holanda, Maria Inês Bueno de André Valery, Miguel Abidon Aidê, Moema  
18 Nudilemon Chatkin, Octávio Messeder, Paulo José Zimmermann Teixeira, Ricardo Luiz de Melo  
19 Martins e Rosali Teixeira da Rocha, em nome da Comissão de Infecções Respiratórias e Micoses  
20 –Sociedade Brasileira de Pneumologia e Tisiologia. Brazilian guidelines for community-acquired  
21 pneumonia in immunocompetent adults - 2009\*. *J Bras Pneumol*. 2009.  
22 90. Boyles THB, A.; Calligaro, G. L.; Cohen, C.; Dheda, K.; Maartens, G.; Richards, G. A.;  
23 Smit, R. Z.; Smith, C.; Wasserman, S.; Whitelaw, A. C.; Feldman, C. South African guideline  
24 for the management of communityacquired pneumonia in adults. *Journal of Thoracic Disease*.  
25 1469;9(6):1469-502.  
26 91. Chaves NJ PG, Biggs BA, Thambiran A, Smith M, Williams J, Gardiner J, Davis JS; on  
27 behalf of the Australasian Society for Infectious Diseases and Refugee Health Network of  
28 Australia Guidelines writing group. RECOMMENDATIONS FOR COMPREHENSIVE POST-  
29 ARRIVAL HEALTH ASSESSMENT FOR PEOPLE FROM REFUGEE-LIKE  
30 BACKGROUNDS AUSTRALASIAN SOCIETY FOR INFECTIOUS DISEASES  
31 AND REFUGEE HEALTH NETWORK OF AUSTRALIA 2ND EDITION. 2010.  
32 92. Anonymous. Guidance for national tuberculosis programmes on the management of  
33 tuberculosis in children. World Health Organization 2nd WHO Guidelines Approved by the  
34 Guidelines Review Committee. 2014.  
35 93. Guidelines on the management of latent tuberculosis infection. World Health  
36 Organisation Guidelines. 2015.  
37 94. Recommendation on 36 months isoniazid preventive therapy to adults and adolescents  
38 living with HIV in resource-constrained and high TB and HIV-prevalence settings: 2015 update.  
39 World Health Organisation Guidelines. 2015.  
40 95. Intensified tuberculosis case-finding and isoniazid preventive therapy for people living  
41 with HIV in resource-constrained settings. World Health Organisation HIV Guidelines. 2011.  
42 96. Organization WH. Latent tuberculosis infection Updated and consolidated guidelines for  
43 programmatic management. 2018.  
44 97. Organization WH. Recommendations for management of common childhood conditions  
45 Newborn conditions, dysentery, pneumonia, oxygen use and delivery, common causes of fever,  
46 severe acute malnutrition and supportive care. 2012.  
47 98. Prevention CfDca. Managing Drug Interactions in the Treatment of HIV-Related  
48 Tuberculosis. 2013.  
49  
50  
51  
52  
53  
54  
55  
56  
57  
58  
59  
60

- 1  
2  
3 99. Johnston A, Kelly SE, Hsieh SC, Skidmore B, Wells GA. Systematic reviews of clinical  
4 practice guidelines: a methodological guide. *J Clin Epidemiol.* 2019;108:64-  
5 76.(doi):10.1016/j.jclinepi.2018.11.030. Epub Dec 5.  
6  
7 100. Tonelli M, Connor Gorber S, Moore A, Thombs BD, Canadian Task Force on Preventive  
8 Health C. Recommendations on routine screening pelvic examination: Canadian Task Force on  
9 Preventive Health Care adoption of the American College of Physicians guideline. *Can Fam*  
10 *Physician.* 2016;62(3):211-4.  
11 101. Darzi A, Abou-Jaoude EA, Agarwal A, Lakis C, Wiercioch W, Santesso N, et al. A  
12 methodological survey identified eight proposed frameworks for the adaptation of health related  
13 guidelines. *J Clin Epidemiol.* 2017;86:3-10.(doi):10.1016/j.jclinepi.2017.01.016. Epub Apr 13.  
14 102. Organization WH. Global antimicrobial resistance and use surveillance system (GLASS)  
15 report. 2020.  
16 103. Organization WH. Worldwide country situation analysis: response to antimicrobial  
17 resistance2015. Available from:  
18 [https://apps.who.int/iris/bitstream/handle/10665/163468/9789241564946\\_eng.pdf?sequence=1](https://apps.who.int/iris/bitstream/handle/10665/163468/9789241564946_eng.pdf?sequence=1).  
19  
20 104. Organization WH. WHO Model Lists of Essential Medicines. 2019.  
21 105. Foundation AtM. Antimicrobial Resistance Benchmark 2018. Available from:  
22 [https://accesstomedicinefoundation.org/media/uploads/downloads/5bc5edd8367eb\\_Antimicrobia](https://accesstomedicinefoundation.org/media/uploads/downloads/5bc5edd8367eb_Antimicrobia)  
23 [l-Resistance-Benchmark-2018.pdf](https://accesstomedicinefoundation.org/media/uploads/downloads/5bc5edd8367eb_Antimicrobia).  
24  
25  
26  
27  
28  
29  
30  
31  
32  
33  
34  
35  
36  
37  
38  
39  
40  
41  
42  
43  
44  
45  
46  
47  
48  
49  
50  
51  
52  
53  
54  
55  
56  
57  
58  
59  
60

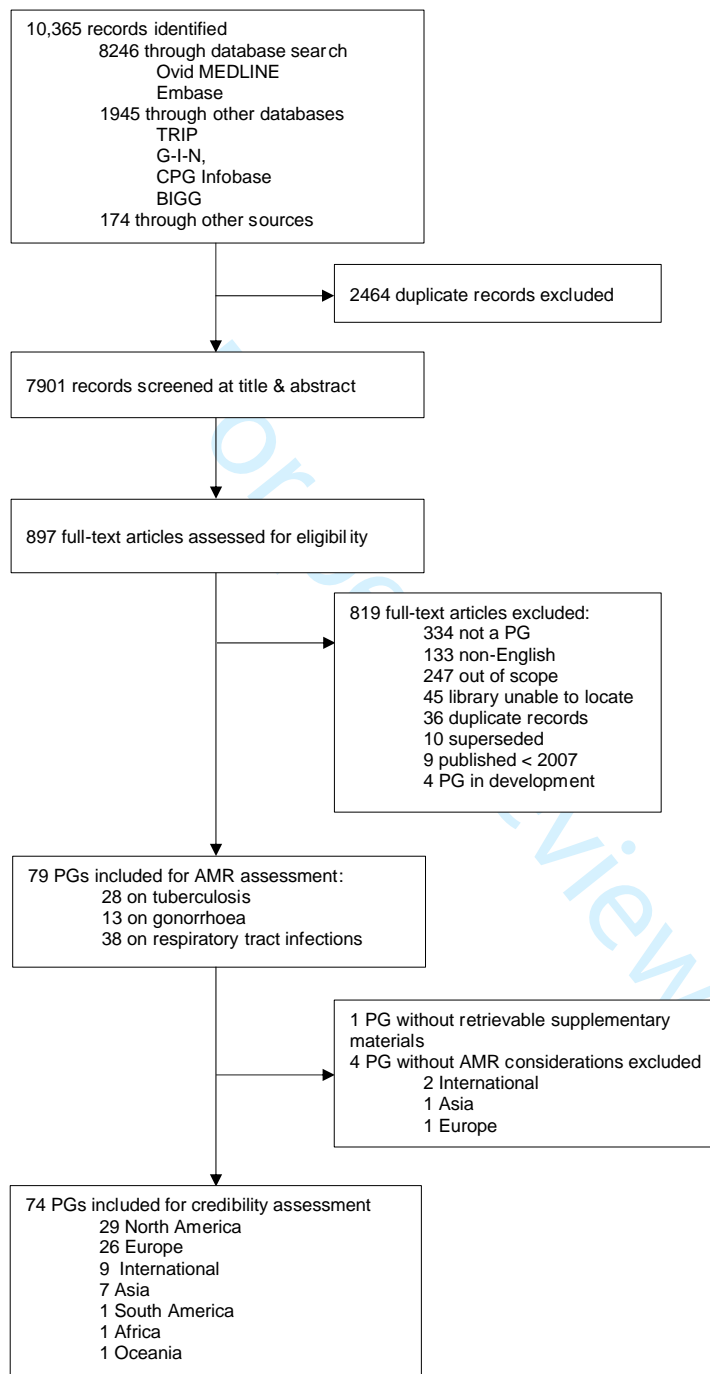

*Figure 1: Flow diagram of the guideline selection process*

PG=Practice guideline. Trip=Turing Research Into Practice. G-I-N=Guidelines International Network. CPG infobase=Canadian Medical Association Clinical Practice Guideline Infobase. BIGG=International database of GRADE guidelines. Out of scope=does not include recommendations on antibiotic selection or prescribing; does not have a significant section on tuberculosis, gonorrhoea, or respiratory tract infections.



1  
2  
3  
4  
5  
6  
7  
8  
9  
10  
11  
12  
13  
14  
15  
16  
17  
18  
19  
20  
21  
22  
23  
24  
25  
26  
27  
28  
29  
30  
31  
32  
33  
34  
35  
36  
37  
38  
39  
40  
41  
42  
43  
44  
45  
46  
47

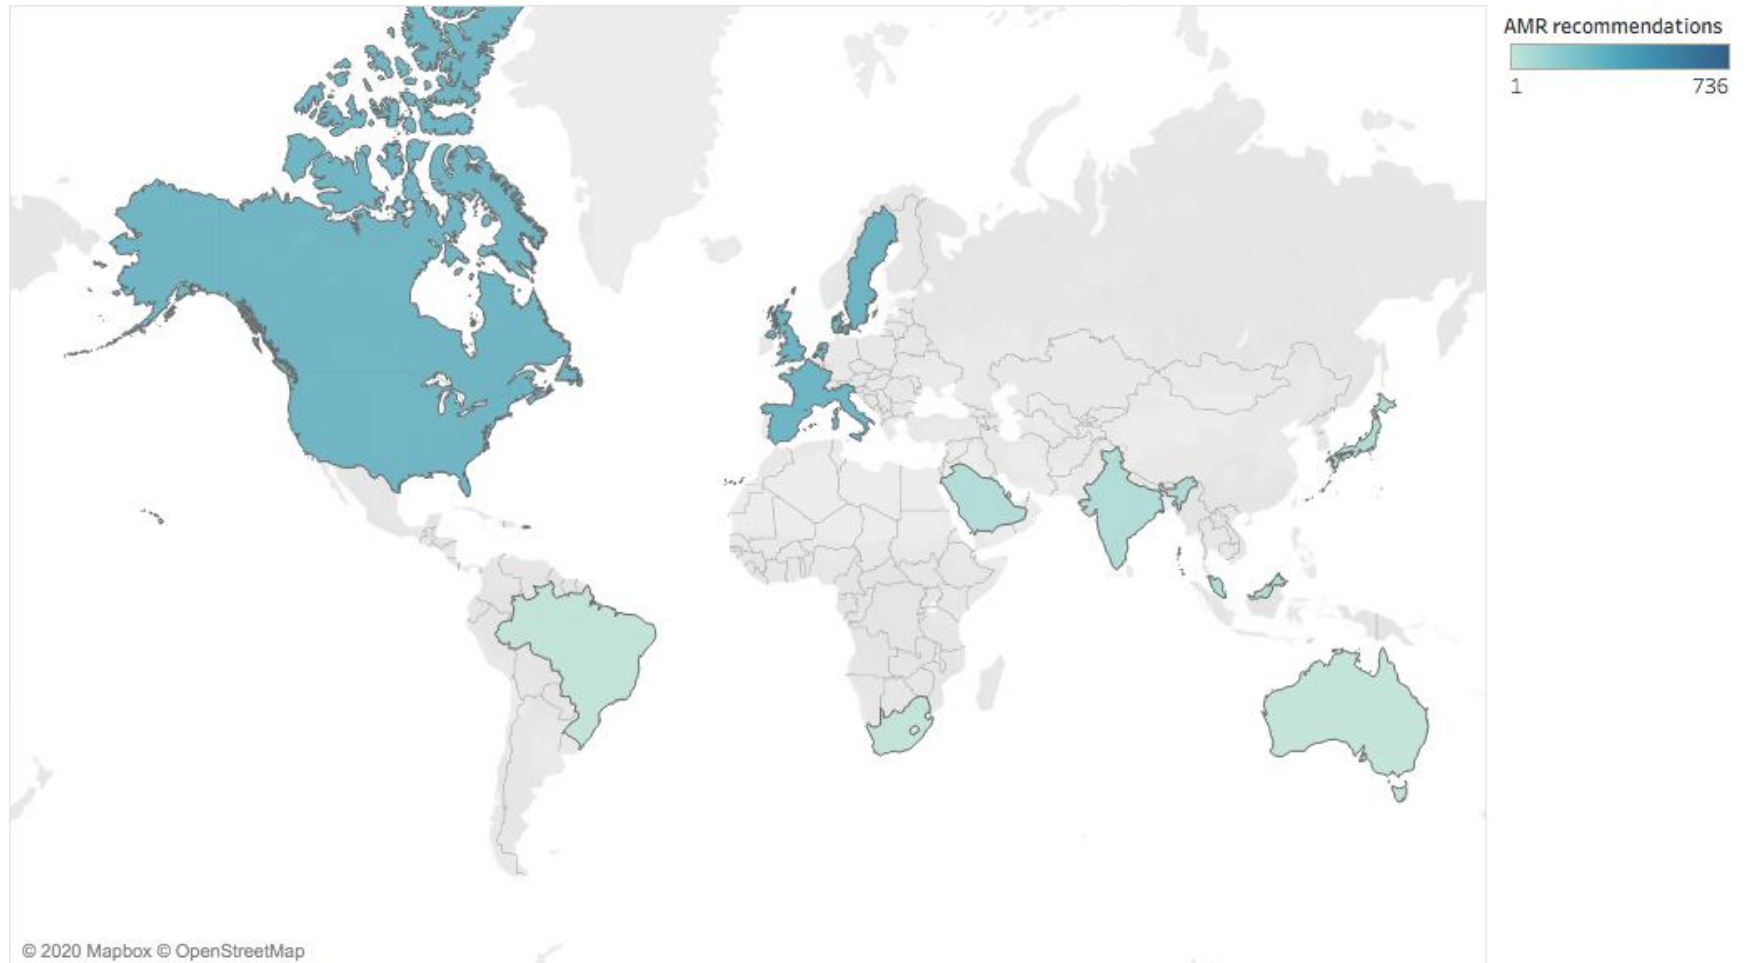

Figure 1: Number of regional guideline recommendations that consider antimicrobial resistance

1  
2  
3  
4  
5  
6  
7  
8  
9  
10  
11  
12  
13  
14  
15  
16  
17  
18  
19  
20  
21  
22  
23  
24  
25  
26  
27  
28  
29  
30  
31  
32  
33  
34  
35  
36  
37  
38  
39  
40  
41  
42  
43  
44  
45  
46  
47  
48  
49  
50  
51  
52  
53  
54  
55  
56  
57  
58  
59  
60

For peer review only

1  
2  
3  
4  
5  
6  
7  
8  
9  
10  
11  
12  
13  
14  
15  
16  
17  
18  
19  
20  
21  
22  
23  
24  
25  
26  
27  
28  
29  
30  
31  
32  
33  
34  
35  
36  
37  
38  
39  
40  
41  
42  
43  
44  
45  
46  
47  
48  
49  
50  
51  
52  
53  
54  
55  
56  
57  
58  
59  
60

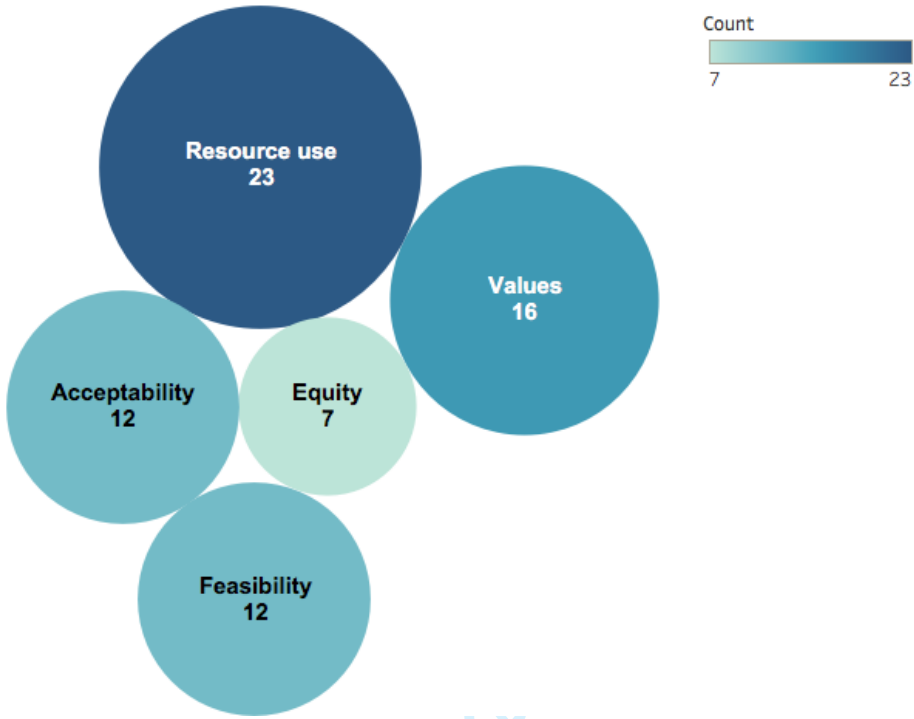

Figure 1: Contextualization of Grading of Recommendations Assessment, Development and Evaluation (GRADE) Evidence to Decision (EtD) frameworks in current guidelines

review only

1  
2  
3  
4  
5  
6  
7  
8  
9  
10  
11  
12  
13  
14  
15  
16  
17  
18  
19  
20  
21  
22  
23  
24  
25  
26  
27  
28  
29  
30  
31  
32  
33  
34  
35  
36  
37  
38  
39  
40  
41  
42  
43  
44  
45  
46  
47  
48  
49  
50  
51  
52  
53  
54  
55  
56  
57  
58  
59  
60

For peer review only

1  
2  
3  
4  
5  
6  
7  
8  
9  
10  
11  
12  
13  
14  
15  
16  
17  
18  
19  
20  
21  
22  
23  
24  
25  
26  
27  
28  
29  
30  
31  
32  
33  
34  
35  
36  
37  
38  
39  
40  
41  
42  
43  
44  
45  
46  
47  
48  
49  
50  
51  
52  
53  
54  
55  
56  
57  
58  
59  
60

### Considering Evidence to Decision criteria by developer

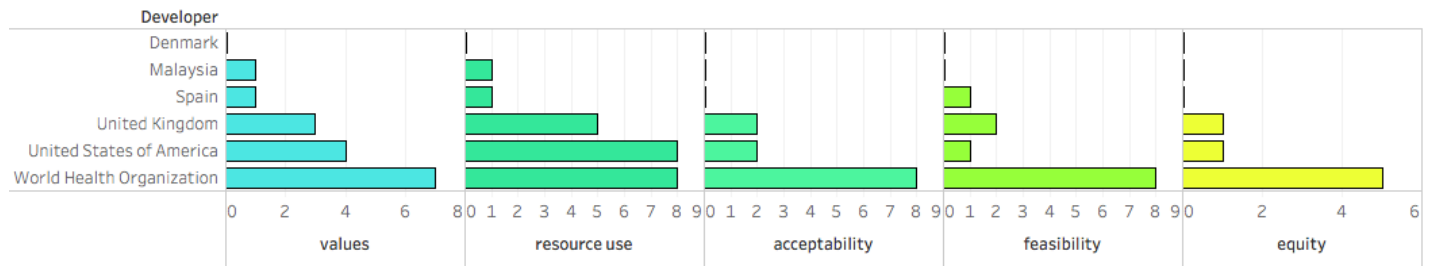

Figure 1: Number of internationally and regionally developed guidelines with considerations of Grading of Recommendations Assessment, Development and Evaluation (GRADE) Evidence to Decision (EtD) frameworks

## Authors: Name, email and institution

1. Rosa Stalteri  
**E:** [stalterr@mcmaster.ca](mailto:stalterr@mcmaster.ca)  
**Institution:** Department of Health Research Methods, Evidence and Impact, Faculty of Health Sciences, McMaster University, Hamilton (ON), Canada
2. Nancy Santesso  
**E:** [santesna@mcmaster.ca](mailto:santesna@mcmaster.ca)  
**Institutional affiliation:** Department of Health Research Methods, Evidence and Impact, Faculty of Health Sciences, McMaster University, Hamilton (ON), Canada, WHO Collaborating Centre for Infectious Diseases, Research Methods and Recommendations, and Michael G. DeGroot Cochrane Canada and MacGRADE Centres, McMaster University, Hamilton (ON), Canada
3. Antonio Bognanni  
**E:** [abognanni95@gmail.com](mailto:abognanni95@gmail.com)  
**Institutional affiliation:** Department of Health Research Methods, Evidence and Impact, Faculty of Health Sciences, McMaster University, Hamilton (ON), Canada
4. Andrea J. Darzi  
**E:** [andrea.j.darzi@gmail.com](mailto:andrea.j.darzi@gmail.com)  
**Institutional affiliation:** Department of Health Research Methods, Evidence and Impact, Faculty of Health Sciences, McMaster University, Hamilton (ON), Canada
5. Samer G. Karam  
**E:** [karams1@mcmaster.ca](mailto:karams1@mcmaster.ca)  
**Institutional affiliation:** Department of Health Research Methods, Evidence and Impact, Faculty of Health Sciences, McMaster University, Hamilton (ON), Canada
6. Thomas Piggott  
**E:** [thomas.piggott@gmail.com](mailto:thomas.piggott@gmail.com)  
**Institutional affiliation:** Department of Health Research Methods, Evidence and Impact, Faculty of Health Sciences, McMaster University, Hamilton (ON), Canada, WHO Collaborating Centre for Infectious Diseases, Research Methods and Recommendations, and Michael G. DeGroot Institute for Infectious Disease Research, McMaster University, Hamilton (ON), Canada
7. Tejan Baldeh  
**E:** [baldeht@mcmaster.ca](mailto:baldeht@mcmaster.ca)  
**Institutional affiliation:** Michael G. DeGroot Cochrane Canada and MacGRADE Centres, McMaster University, Hamilton (ON), Canada
8. Finn C. Schünemann  
**E:** [finnschuenemann@googlemail.com](mailto:finnschuenemann@googlemail.com)

**Institutional affiliation:** Michael G. DeGroot Cochrane Canada and MacGRADE Centres, McMaster University, Hamilton (ON), Canada

9. Matthew Ventresca

**E:** [ventrem@mcmaster.ca](mailto:ventrem@mcmaster.ca)

**Institutional affiliation:** Department of Health Research Methods, Evidence and Impact, Faculty of Health Sciences, McMaster University, Hamilton (ON), Canada, and Michael G. DeGroot Cochrane Canada and MacGRADE Centres, McMaster University, Hamilton (ON), Canada

10. Gian Paolo Morgano

**E:** [gianpaolo.morgano@gmail.com](mailto:gianpaolo.morgano@gmail.com)

**Institutional affiliation:** Department of Health Research Methods, Evidence and Impact, Faculty of Health Sciences, McMaster University, Hamilton (ON), Canada, and Michael G. DeGroot Cochrane Canada and MacGRADE Centres, McMaster University, Hamilton (ON), Canada

11. Lorenzo Moja

**E:** [mojal@who.int](mailto:mojal@who.int)

**Institutional affiliation:** Department of Health Product Policy and Standards, World Health Organization, Geneva 1211, Switzerland

12. Prof Mark Loeb

**E:** [loebm@mcmaster.ca](mailto:loebm@mcmaster.ca)

**Institutional affiliation:** Department of Health Research Methods, Evidence and Impact, Faculty of Health Sciences, McMaster University, Hamilton (ON), Canada, WHO Collaborating Centre for Infectious Diseases, Research Methods and Recommendations, Michael G. DeGroot Cochrane Canada and MacGRADE Centres, McMaster University, Hamilton (ON), Canada, Department of Pathology and Molecular Medicine, McMaster University, Hamilton (ON), Canada, and Michael G. DeGroot Institute for Infectious Disease Research, McMaster University, Hamilton (ON), Canada

13. Prof Holger J. Schünemann

**E:** [schuneh@mcmaster.ca](mailto:schuneh@mcmaster.ca)

**Institutional affiliation:** Department of Health Research Methods, Evidence and Impact, Faculty of Health Sciences, McMaster University, Hamilton (ON), Canada, WHO Collaborating Centre for Infectious Diseases, Research Methods and Recommendations, Michael G. DeGroot Cochrane Canada and MacGRADE Centres, McMaster University, Hamilton (ON), Canada, and Department of Medicine, McMaster University, Hamilton (ON), Canada

Appendix A

Extra figures & tables

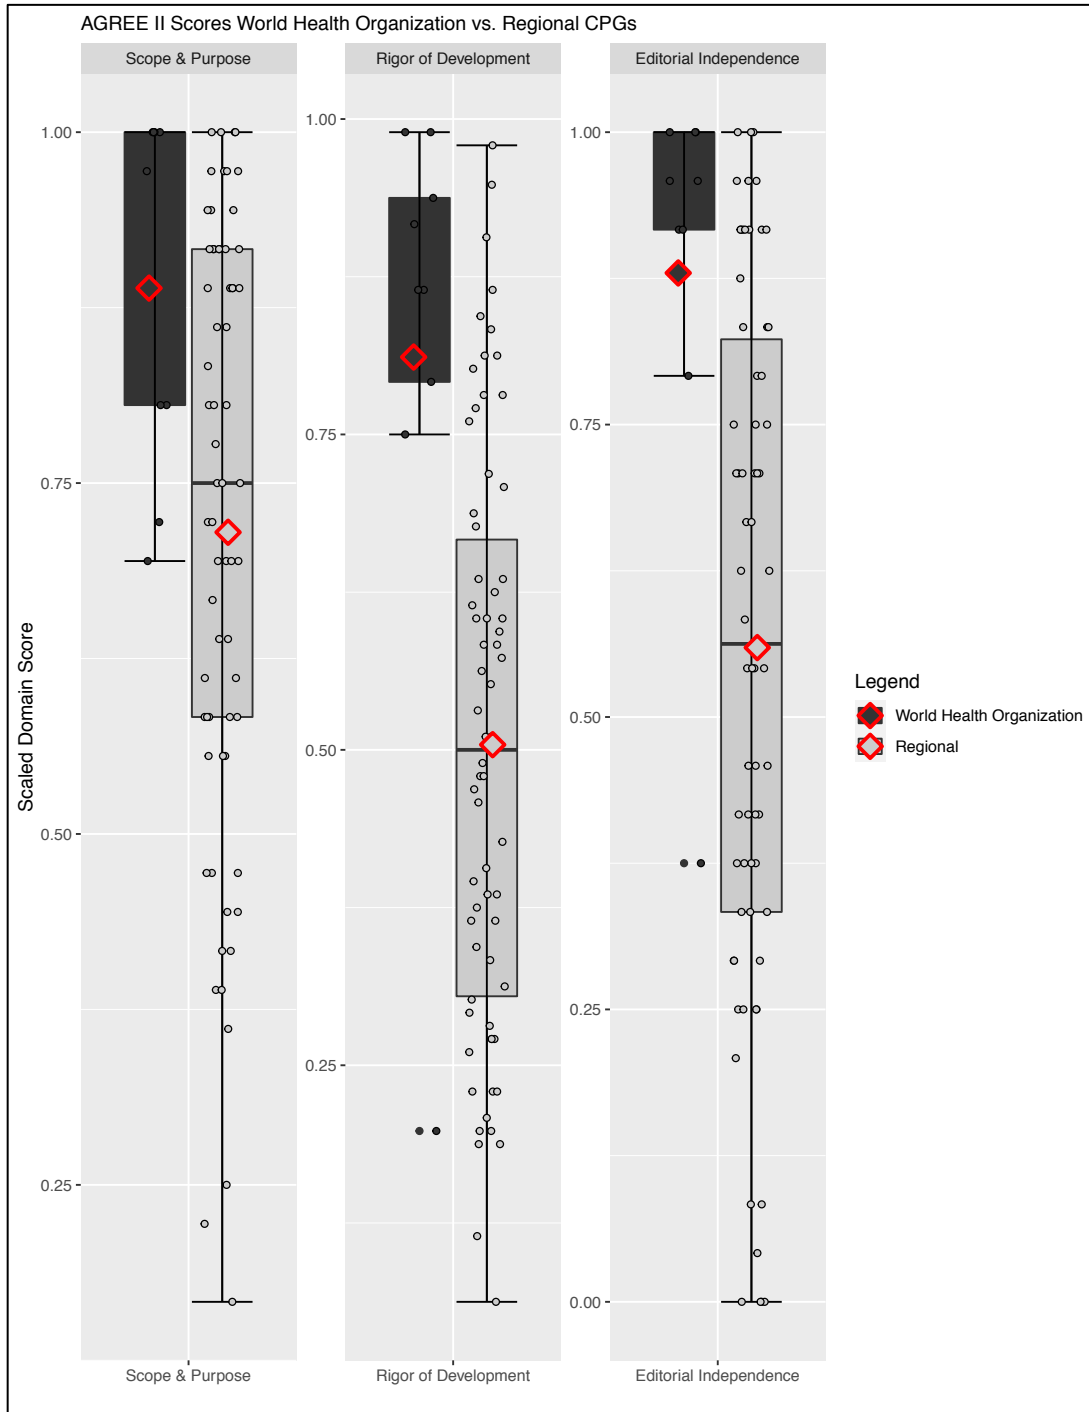

Figure 5: Boxplot of AGREE II scores comparing World Health Organization and regional PGs

AGREE II = Appraisal of Guidelines for Research & Evaluation II Instrument; Dark grey dots = World Health Organization clinical practice guidelines; light grey dots = Rest of the World clinical practice



guidelines. Scope and purpose = domain one; rigor of development = domain three; editorial independence = domain six.

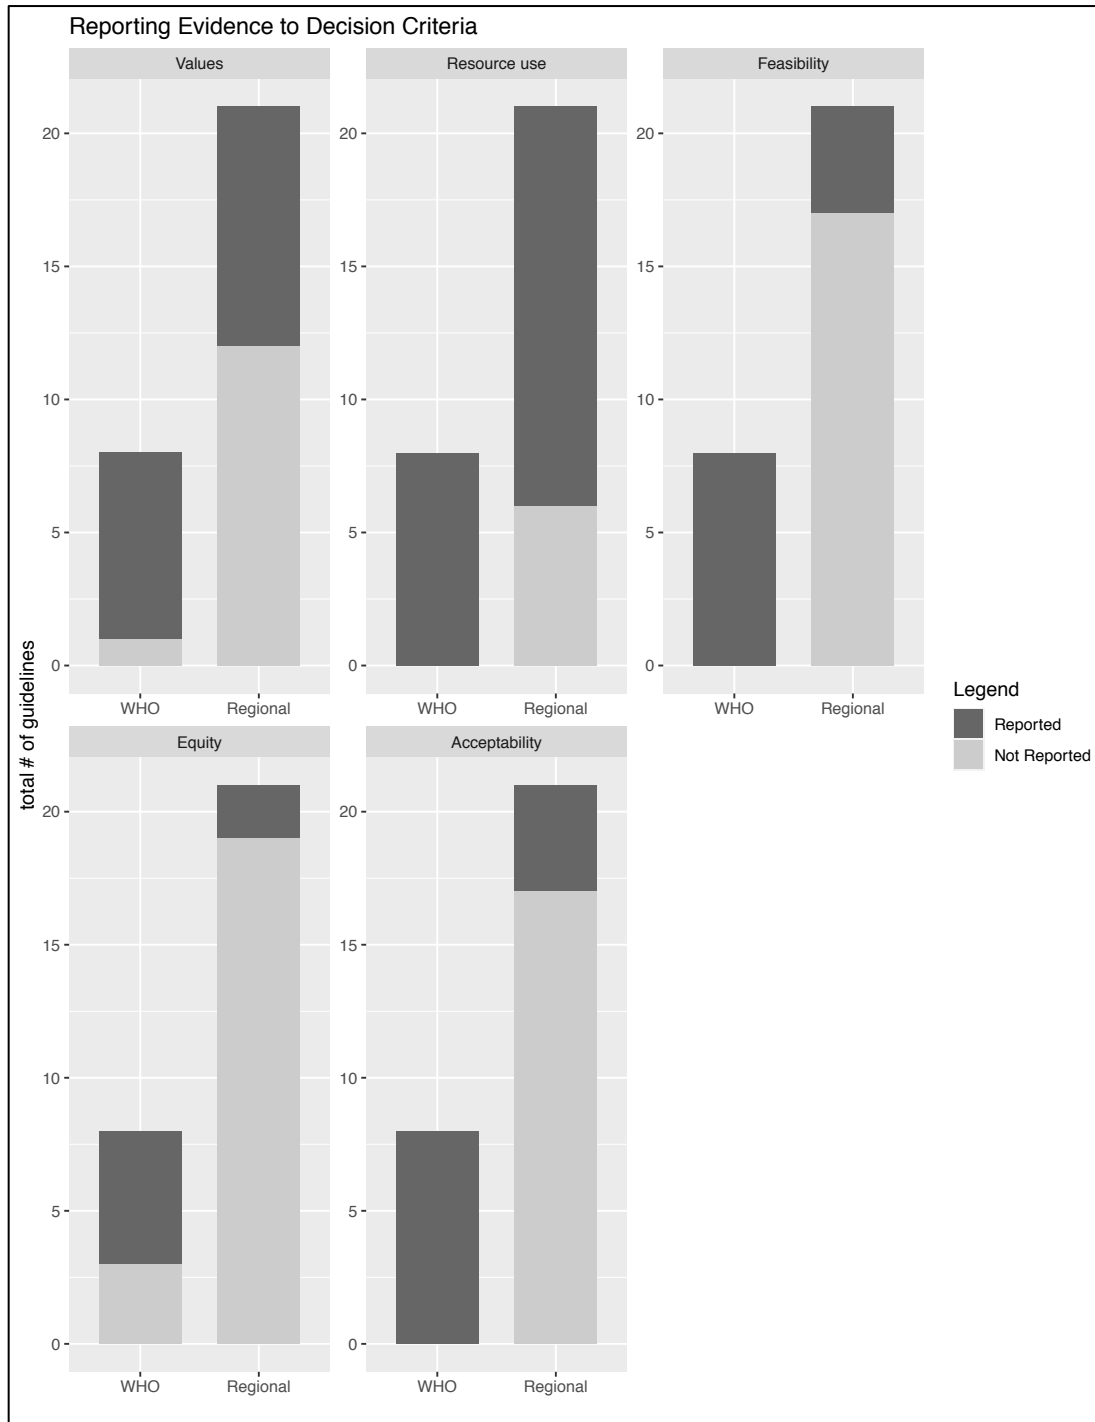

Figure 6: World Health Organization versus regional PGs meeting AGREE II scores  $\geq 60\%$  reporting GRADE Evidence to Decision Frameworks

PGs = Practice guidelines; 29/75 clinical practice guidelines with AMR considerations had a scaled domain score of  $\geq 60\%$ ; EtD criteria = evidence to decision criteria: values, resource use, feasibility, acceptability, and equity

Table 1: Research question in PICAR format

| PICAR item                                                      |                                                                                                                                                                                                                                                                                                                                                                                                                                                                                                                          |
|-----------------------------------------------------------------|--------------------------------------------------------------------------------------------------------------------------------------------------------------------------------------------------------------------------------------------------------------------------------------------------------------------------------------------------------------------------------------------------------------------------------------------------------------------------------------------------------------------------|
| <b>P: Population, clinical indications(s), and condition(s)</b> | 1) Tuberculosis; 2) Gonorrhoea; and 3) Respiratory tract infections: otitis media, pharyngitis, sinusitis, and community acquired pneumonia.                                                                                                                                                                                                                                                                                                                                                                             |
| <b>I: Intervention(s)</b>                                       | Any intervention that treats tuberculosis, gonorrhoea, and respiratory tract infections.                                                                                                                                                                                                                                                                                                                                                                                                                                 |
| <b>C: Comparator(s), Comparison(s), and (key) content</b>       | Any comparator.                                                                                                                                                                                                                                                                                                                                                                                                                                                                                                          |
| <b>A: Attributes of eligible guidelines</b>                     | <p><b>Publication year:</b> 2007 and above.</p> <p><b>Language of publication:</b> English.</p> <p><b>Scope: International and regional</b> guidelines.</p> <p><b>Purpose:</b> provide a recommendation on antibiotic selection and prescribing.</p> <p><b>Format:</b> any.</p> <p><b>Specific methodological standards: guidelines</b> that meet the AGREE II cut off score <math>\geq 60\%</math> in scope and purpose (domain one), rigor of development (domain three), and editorial independence (domain six).</p> |
| <b>R: Recommendation characteristics</b>                        | <p>At least one recommendation considers AMR.</p> <p><b>Location of recommendation:</b> anywhere within the guideline text, tables, and/or decision paths.</p>                                                                                                                                                                                                                                                                                                                                                           |

## Search strategy Ovid Medline and Embase

Database: Embase <1974 to 2019 June 07>, OVID Medline Epub Ahead of Print, In-Process & Other Non-Indexed Citations, Ovid MEDLINE(R) Daily and Ovid MEDLINE(R) 1946 to Present  
Search Strategy:

-----

- 1 (tuberculosis or tuberculous or TB).mp. (510746)
- 2 (gonoc\* or gonorr\*).mp. (58460)
- 3 pneumonia\*.mp. (557015)
- 4 strepto\*.mp. (531324)
- 5 (pneumonia\* adj2 strepto\*).mp. (83649)
- 6 1 or 2 or 5 (648159)
- 7 exp clinical pathway/ (14358)
- 8 exp clinical protocol/ (252634)
- 9 exp consensus/ (72535)
- 10 exp consensus development conference/ (35258)
- 11 exp consensus development conferences as topic/ (26540)
- 12 critical pathways/ (14358)
- 13 exp guideline/ (32021)
- 14 guidelines as topic/ (375998)
- 15 exp practice guideline/ (526549)
- 16 practice guidelines as topic/ (381407)
- 17 health planning guidelines/ (93323)
- 18 (guideline or practice guideline or consensus development conference or consensus development conference, NIH).pt. (40981)
- 19 (position statement\* or policy statement\* or practice parameter\* or best practice\*).ti,ab,kf,kw. (71605)
- 20 (standards or guideline or guidelines).ti,kf,kw. (243012)
- 21 ((practice or treatment\* or clinical) adj guideline\*).ab. (90132)
- 22 (CPG or CPGs).ti. (12033)
- 23 consensus\*.ti,kf,kw. (53111)
- 24 consensus\*.ab. /freq=2 (52722)
- 25 ((critical or clinical or practice) adj2 (path or paths or pathway or pathways or protocol\*).ti,ab,kf,kw. (47116)
- 26 recommendat\*.ti,kf,kw. (85035)
- 27 (care adj2 (standard or path or paths or pathway or pathways or map or maps or plan or plans)).ti,ab,kf,kw. (142098)
- 28 (algorithm\* adj2 (screening or examination or test or tested or testing or assessment\* or diagnosis or diagnoses or diagnosed or diagnosing)).ti,ab,kf,kw. (16221)
- 29 (algorithm\* adj2 (pharmacotherap\* or chemotherap\* or chemotreatment\* or therap\* or treatment\* or intervention\*).ti,ab,kf,kw. (22274)
- 30 or/7-29 (1489076)
- 31 6 and 30 (17406)
- 32 limit 31 to yr="2007 -Current" (11340)
- 33 (randomised or randomized or study or trial).ti. (3257255)
- 34 32 not 33 (10455)
- 35 limit 34 to (conference abstract or editorial or erratum or letter or tombstone or address or autobiography or biography or case reports or clinical trial, all or clinical trial protocol or clinical trial protocols as topic or clinical trial or comment or controlled clinical trial or interview or news or newspaper article or patient education handout or personal narrative or portrait or pragmatic clinical trial or randomized controlled trial) [Limit not valid in Embase,Ovid MEDLINE(R),Ovid

1  
2  
3 MEDLINE(R) Daily Update,Ovid MEDLINE(R) In-Process,Ovid MEDLINE(R) Publisher; records  
4 were retained] (2878)

5 36 34 not 35 (7577)

6 37 limit 36 to yr="2014 -Current" (3831)

7 38 limit 36 to yr="2007 - 2014" (4415)

8 39 remove duplicates from 38 (3464)

9 40 remove duplicates from 37 (2937)

10 41 39 or 40 (5910)

11

12

13

14

15

16

17

18

19

20

21

22

23

24

25

26

27

28

29

30

31

32

33

34

35

36

37

38

39

40

41

42

43

44

45

46

47

48

49

50

51

52

53

54

55

56

57

58

59

60

Table 2: Definition of recommendations that consider antibiotic resistance

| Recommendation                         | Definition                                                                                                                                                                                                                                                                                                                                                                                                                                                                                                                                                                                                                                                                                                                                                                                                                                                           | Example                                                                                                                                                                                                                                                                                                                                                                                                                                                                                                                                                                                                                                                                                                                                      |
|----------------------------------------|----------------------------------------------------------------------------------------------------------------------------------------------------------------------------------------------------------------------------------------------------------------------------------------------------------------------------------------------------------------------------------------------------------------------------------------------------------------------------------------------------------------------------------------------------------------------------------------------------------------------------------------------------------------------------------------------------------------------------------------------------------------------------------------------------------------------------------------------------------------------|----------------------------------------------------------------------------------------------------------------------------------------------------------------------------------------------------------------------------------------------------------------------------------------------------------------------------------------------------------------------------------------------------------------------------------------------------------------------------------------------------------------------------------------------------------------------------------------------------------------------------------------------------------------------------------------------------------------------------------------------|
| Considers resistance if                | <p>1. The recommendation is for a <b>population</b> that is infected with a resistant organism (i.e. people with drug-resistant TB); <b>OR</b></p> <p>2. The recommendation is supported by <b>country-specific resistance patterns</b>;<sup>1</sup> <b>OR</b></p> <p>3. The recommendation question (or PICO question) that has resistance as an <b>outcome</b>. <b>OR</b></p> <p>The <b>outcome</b> may be any of the following:<br/> ‘resistance’, ‘resistant’, ‘drug-resistance’, ‘antibiotic resistance’<br/> ‘antimicrobial resistance’, ‘antimicrobial in vitro resistance’, ‘acquired drug-resistance’</p> <p>4. The recommendation is to prescribe narrow-spectrum antibiotics over broad-spectrum antibiotics. <b>OR</b></p> <p>5. A recommendation for no antibiotic prescription or back-up antibiotic prescription (i.e. watchful waiting approach)</p> | <p><b>Example: A recommendation that considers country-specific resistance, and has a resistance-related outcome.</b></p> <p>“In adults and adolescents with gonococcal oropharyngeal infections, the WHO STI guideline suggests dual therapy over single therapy...and suggests single therapy (<u>based on recent local resistance data confirming susceptibility to the antimicrobial</u>).”</p> <p>The PICO table that was provided has ‘antimicrobial in vitro resistance’ as an outcome.<sup>2</sup></p>                                                                                                                                                                                                                               |
| <b>DOES NOT</b> consider resistance if | <p>1. The recommendation is <b>NOT</b> for a population that is infected with a resistant organism. <b>AND</b></p> <p>2. The recommendation is <b>NOT</b> supported by country-specific resistant patterns. <b>AND</b></p> <p>3. The recommendation question (or PICO question) <b>DOES NOT</b> have any resistant outcomes. <b>AND</b></p> <p>4. Recommendation <b>DOES NOT</b> prescribe narrow-spectrum antibiotics. <b>AND</b></p> <p>5. There are no recommendations on no antibiotic nor back-up antibiotic or no watchful-waiting approach.</p>                                                                                                                                                                                                                                                                                                               | <p><b>Example: A recommendation that is not intended for a population that is infected with a resistant organism, nor is it supported by country specific resistant patterns, nor does it have outcomes pertaining to resistance.</b></p> <p>The BASHH 2013 guidelines recommended that “ceftriaxone 500mg intramuscularly single dose followed by oral Doxycycline 100mg bd plus oral Metronidazole 400mg bd both for 12 weeks was recommended for children over the age of 12.”<sup>3</sup></p> <p>For this recommendation, neither the guideline nor the supplementary materials mention that they considered England’s resistance patterns when developing the recommendation, nor were there any outcomes pertaining to resistance.</p> |

<sup>1</sup> Informed by the Elias et al 2017.

<sup>2</sup> WHO guidelines for the Treatment of Neisseria gonorrhoeae. 2016.

<sup>3</sup> BASHH 2013 Management of gonorrhoea and pelvic inflammatory disease in children.

Table 3: List of websites of organizations and associations that provide clinical practice guidelines

| International                                                                                                                                                                                                                                  | Canada                                                                                                                                                                                                                                     |
|------------------------------------------------------------------------------------------------------------------------------------------------------------------------------------------------------------------------------------------------|--------------------------------------------------------------------------------------------------------------------------------------------------------------------------------------------------------------------------------------------|
| The World Health Organization (WHO):<br><a href="https://www.who.int">https://www.who.int</a>                                                                                                                                                  | The Public Health Agency of Canada (PHAC):<br><a href="https://www.canada.ca/en/public-health.html">https://www.canada.ca/en/public-health.html</a>                                                                                        |
| The Centres for Disease Control and Prevention (CDC): <a href="https://www.cdc.gov">https://www.cdc.gov</a>                                                                                                                                    | Public Health Ontario (PHO):<br><a href="https://www.publichealthontario.ca">https://www.publichealthontario.ca</a>                                                                                                                        |
| The Scottish Intercollegiate Guidelines Network (SIGN): <a href="https://www.sign.ac.uk">https://www.sign.ac.uk</a>                                                                                                                            | Pan Canadian Public Health Network:<br><a href="http://www.phn-rsp.ca/index-eng.php">http://www.phn-rsp.ca/index-eng.php</a>                                                                                                               |
| The Robert Koch Institute (RKI):<br><a href="https://www.rki.de/EN/Home/homepage_no_de.html">https://www.rki.de/EN/Home/homepage_no_de.html</a>                                                                                                | The Canadian Task Force on Preventative Health Care (CTFPHC):<br><a href="https://canadiantaskforce.ca">https://canadiantaskforce.ca</a>                                                                                                   |
| The National Institute for Health and Care Excellence (NICE): <a href="https://www.nice.org.uk">https://www.nice.org.uk</a>                                                                                                                    | The College of Physicians and Surgeons of Ontario (CPSO): <a href="https://www.cpso.on.ca">https://www.cpso.on.ca</a>                                                                                                                      |
| The European Centre for Disease Prevention and Control (ECDC):<br><a href="https://ecdc.europa.eu/en/home">https://ecdc.europa.eu/en/home</a>                                                                                                  | The Guidelines Advisory Committee (GAC):<br><a href="https://www.gacguidelines.ca">https://www.gacguidelines.ca</a>                                                                                                                        |
| The Australian Government National Health and Medical Research Council (NHMRC):<br><a href="https://www.nhmrc.gov.au">https://www.nhmrc.gov.au</a>                                                                                             | The Canadian Agency for Drugs and Technologies in Health (CADTH):<br><a href="https://www.cadth.ca">https://www.cadth.ca</a>                                                                                                               |
| Australian Clinical Practice Guidelines:<br><a href="https://www.clinicalguidelines.gov.au">https://www.clinicalguidelines.gov.au</a>                                                                                                          | Association of Medical Microbiology of Infectious Disease Canada:<br><a href="https://www.ammi.ca">https://www.ammi.ca</a>                                                                                                                 |
| New Zealand Guidelines Group:<br><a href="https://www.health.govt.nz/about-ministry/ministry-health-websites/new-zealand-guidelines-group">https://www.health.govt.nz/about-ministry/ministry-health-websites/new-zealand-guidelines-group</a> | The Registered Nurses Association of Ontario's Best Practice Guidelines (NAOBPG):<br><a href="https://rnao.ca/bpg">https://rnao.ca/bpg</a>                                                                                                 |
| United States Preventative Services Task Force:<br><a href="https://www.uspreventiveservicestaskforce.org">https://www.uspreventiveservicestaskforce.org</a>                                                                                   | Canadian Paediatric Society:<br><a href="https://www.cps.ca">https://www.cps.ca</a>                                                                                                                                                        |
| Infectious Diseases Society of America:<br><a href="https://www.idsociety.org">https://www.idsociety.org</a>                                                                                                                                   | British Columbia (BC) Guidelines:<br><a href="https://www2.gov.bc.ca/gov/content/health/practitioner-professional-resources/bc-guidelines">https://www2.gov.bc.ca/gov/content/health/practitioner-professional-resources/bc-guidelines</a> |
| American Academy of Family Physicians<br><a href="https://www.aafp.org">https://www.aafp.org</a>                                                                                                                                               | British Columbia Centre for Disease Control (BCCDC): <a href="http://www.bccdc.ca">http://www.bccdc.ca</a>                                                                                                                                 |
| The American Thoracic Society (ATS):<br><a href="https://www.thoracic.org">https://www.thoracic.org</a>                                                                                                                                        | Towards Optimized Practice (TOP):<br><a href="http://www.topalbertadoctors.org/home/">http://www.topalbertadoctors.org/home/</a>                                                                                                           |
|                                                                                                                                                                                                                                                | Winnipeg Regional Health Authority (WHRA):<br><a href="http://www.wrha.mb.ca">http://www.wrha.mb.ca</a>                                                                                                                                    |

**Details to extract and record from the guidelines<sup>4</sup>:**

1. Type of source.
2. Organization.
3. Document title.
4. Website link
5. Reference
6. The date of publication of guidelines/recommendations.
7. Year of planned update of the guideline/recommendations and the systematic review.
8. Recommendation that considers AMR.
9. What type of evidence did the recommendation that considers resistance consider?
10. The recommendation focus (i.e. tuberculosis, gonorrhoea, or respiratory tract infections)
11. The guideline question matched to the recommendation.
12. The number of recommendations on antibiotic use that consider AMR in each guideline.
13. The direction of the recommendations: for or against, or others variations.
14. The strength of the recommendations.
15. Type of infection.
16. Setting: hospital or community (i.e. primary, secondary, and tertiary care settings, low- or high-income settings, etc.).
17. Target population (i.e. people with cephalosporin resistant *Neisseria gonorrhoeae*).
18. The systematic reviews that support the recommendation. This includes systematic review that supports the certainty of the effect, and the systematic review conducted for the values and preferences of patients, equity issues and applicability.
  - a. We will record the publication year.
  - b. The research questions in PICO format.
  - c. Risk of Bias assessment conducted.
  - d. Analysis method (i.e. meta-analysis).
  - e. Year of planned update.
19. Type of evidence summary methods (narrative, GRADE tables including the summary of findings (SoF) table, evidence profiles (EP) table, or other evidence tables).
  - a. Assessment of the certainty of the evidence for each outcome.

---

<sup>4</sup> Details are informed by GRADE-ADOLOPMENT paper, appendix 1, step 5.

1  
2  
3  
4 20. EtD available.  
5

6 21. Criteria that influence the strength and direction of the recommendations are available or  
7 summarized. This includes:

- 8 a. The problem and its importance;  
9 b. The certainty of the evidence;  
10 c. The values and preferences of patients. Are the patient's values and preferences  
11 described?: yes with search strategy available; yes – systematic review without  
12 search strategy, yes–narrative; no; other (specify).  
13 d. The balance between health benefits, harms and burden;  
14 e. The resources that are required. Is the cost effectiveness described?: yes–Cost-  
15 effectiveness analysis; yes–systematic review without search strategy; yes–  
16 narrative; no; other (specify).  
17 f. The increase or decrease in equity; where there health inequity considerations?  
18 g. Acceptability: are stakeholder acceptability to most it is to the users and the  
19 public described; and  
20 h. The feasibility of the recommendation: is the feasibility described?  
21  
22

23 22. Reporting or describing the following EtD criteria (yes/no): values, resource use,  
24 acceptability, feasibility, equity.

- 25 a. How were they reported? Was the evidence buried within paragraphs, or easily  
26 found within the guideline through subheadings and tables?  
27 b. Was values, resource use, acceptability feasibility, or equity considerations part  
28 of their methodology? If so, the guideline/supplementary material actually report  
29 values, resource use, acceptability, feasibility, and equity?  
30 c. Type of evidence used to inform EtD criteria, i.e. research evidence or expert or  
31 expert opinion  
32  
33  
34  
35  
36  
37  
38  
39  
40  
41  
42  
43  
44  
45  
46  
47  
48  
49  
50  
51  
52  
53  
54  
55  
56  
57  
58  
59  
60



**Appendix B***Table 4: Number of GRADE Evidence to Decision Frameworks criteria reported in guidelines developed Internationally and regionally*

| Author                                            | Guideline developer        | Year | Focus area                   | Number of EtD criteria reported | Values       | Resource use | Acceptability | Feasibility  | Equity       |
|---------------------------------------------------|----------------------------|------|------------------------------|---------------------------------|--------------|--------------|---------------|--------------|--------------|
| Chow AWB et al.                                   | IDSA                       | 2012 | Sinusitis                    | 1                               | Not reported | Reported     | Not reported  | Not reported | Not reported |
| Abdul Rahaman JAK et al.                          | Malaysian Family Physician | 2012 | Tuberculosis                 | 2                               | Reported     | Reported     | Not reported  | Not reported | Not reported |
| World Health Organization                         | WHO                        | 2014 | Tuberculosis                 | 3                               | Not reported | Reported     | Reported      | Reported     | Not reported |
| National Institute for Health and Care Excellence | NICE                       | 2016 | Tuberculosis                 | 4                               | Reported     | Reported     | Reported      | Reported     | Not reported |
| World Health Organization                         | WHO                        | 2019 | Tuberculosis                 | 5                               | Reported     | Reported     | Reported      | Reported     | Reported     |
| British Infection Association                     | British Thoracic Society   | 2009 | Community-acquired pneumonia | 1                               | Not reported | Reported     | Not reported  | Not reported | Not reported |
| Spanish Society for                               | Spanish Society for        | 2010 | Tuberculosis                 | 3                               | Reported     | Reported     | Not reported  | Reported     | Not reported |

|                                                                 |                                                                     |      |                              |   |          |              |              |              |              |
|-----------------------------------------------------------------|---------------------------------------------------------------------|------|------------------------------|---|----------|--------------|--------------|--------------|--------------|
| Epidemiology, Spanish Society of Primary Care, Physicians, etc. | Epidemiology, Spanish Society of Primary Care, Physicians, etc.     |      |                              |   |          |              |              |              |              |
| American Academy of Pediatrics                                  | American Academy of Pediatrics                                      | 2013 | Otitis media                 | 2 | Reported | Reported     | Not reported | Not reported | Not reported |
| National Institute for Health and Clinical Excellence           | NICE                                                                | 2014 | Community-acquired pneumonia | 2 | Reported | Not reported | Not reported | Reported     | Not reported |
| World Health Organization                                       | WHO                                                                 | 2015 | Tuberculosis                 | 5 | Reported | Reported     | Reported     | Reported     | Reported     |
| Richard M. Rosenfeld et al.                                     | American Academy of Otolaryngology—Head and Neck Surgery Foundation | 2015 | Sinusitis                    | 3 | Reported | Reported     | Reported     | Not reported | Not reported |

1  
2  
3  
4  
5  
6  
7  
8  
9  
10  
11  
12  
13  
14  
15  
16  
17  
18  
19  
20  
21  
22  
23  
24  
25  
26  
27  
28  
29  
30  
31  
32  
33  
34  
35  
36  
37  
38  
39  
40  
41  
42  
43  
44  
45  
46  
47

|                                            |                                                                     |      |                           |   |              |              |              |              |              |
|--------------------------------------------|---------------------------------------------------------------------|------|---------------------------|---|--------------|--------------|--------------|--------------|--------------|
| World Health Organization                  | WHO                                                                 | 2015 | Tuberculosis              | 5 | Reported     | Reported     | Reported     | Reported     | Reported     |
| Richard M. Rosenfeld et al.                | American Academy of Otolaryngology—Head and Neck Surgery Foundation | 2016 | Otitis media              | 3 | Reported     | Reported     | Reported     | Not reported | Not reported |
| World Health Organization                  | WHO                                                                 | 2016 | Gonorrhoea                | 5 | Reported     | Reported     | Reported     | Reported     | Reported     |
| P. Nahid et al.                            | IDSA                                                                | 2016 | Tuberculosis              | 0 | Not reported |
| Institute for Clinical Systems Improvement | Institute for Clinical Systems Improvement                          | 2017 | Pharyngitis and sinusitis | 1 | Not reported | Reported     | Not reported | Not reported | Not reported |
| Stanford T. Shulman et al.                 | IDSA                                                                | 2012 | Pharyngitis               | 1 | Not reported | Reported     | Not reported | Not reported | Not reported |
| Ministry of Health Malaysia                | Ministry of Health Malaysia                                         | 2012 | Otitis media              | 0 | Not reported |
| Heidemann CL et al.                        | Danish Health and                                                   | 2016 | Otitis media              | 0 | Not reported |

|  |                                                                                          |                                    |      |              |   |              |          |              |              |              |
|--|------------------------------------------------------------------------------------------|------------------------------------|------|--------------|---|--------------|----------|--------------|--------------|--------------|
|  | Medicines Authority and the Danish Society of Otorhinolaryngology, Head and Neck Surgery |                                    |      |              |   |              |          |              |              |              |
|  | The Scottish Intercollegiate Guidelines Network                                          | SIGN                               | 2010 | Pharyngitis  | 2 | Reported     | Reported | Not reported | Not reported | Not reported |
|  | World Health Organization                                                                | WHO                                | 2011 | Tuberculosis | 4 | Reported     | Reported | Reported     | Reported     | Not reported |
|  | Richard M. Rosenfeld et al.                                                              | American Academy of Otolaryngology | 2015 | Sinusitis    | 2 | Reported     | Reported | Not reported | Not reported | Not reported |
|  | World Health Organization                                                                | WHO                                | 2018 | Tuberculosis | 5 | Reported     | Reported | Reported     | Reported     | Reported     |
|  | World Health Organization                                                                | WHO                                | 2012 | Otitis media | 4 | Reported     | Reported | Reported     | Reported     | Not reported |
|  | The National Institute for Health and Care Excellence                                    | NICE                               | 2018 | Pharyngitis  | 1 | Not reported | Reported | Not reported | Not reported | Not reported |

1  
2  
3  
4  
5  
6  
7  
8  
9  
10  
11  
12  
13  
14  
15  
16  
17  
18  
19  
20  
21  
22  
23  
24  
25  
26  
27  
28  
29  
30  
31  
32  
33  
34  
35  
36  
37  
38  
39  
40  
41  
42  
43  
44  
45  
46  
47

|                                                                                                                                  |               |      |                              |   |              |              |              |              |              |
|----------------------------------------------------------------------------------------------------------------------------------|---------------|------|------------------------------|---|--------------|--------------|--------------|--------------|--------------|
| The National Institute for Health and Care Excellence                                                                            | NICE          | 2019 | Community-acquired pneumonia | 0 | Not reported |
| National Institutes of Health, Centers for Disease Control and Prevention, et al.                                                | NIH, CDC      | 2013 | Tuberculosis                 | 1 | Not reported | Reported     | Not reported | Not reported | Not reported |
| The National Institute for Health and Care Excellence; National Collaborating Centre for Women's and Children's Health (NCC-WCH) | NICE, NCC-WCH | 2008 | Otitis media                 | 3 | Not reported | Reported     | Reported     | Not reported | Reported     |
| United States Preventative Task Force                                                                                            | USPTF         | 2019 | Gonorrhoea                   | 2 | Not reported | Not reported | Not reported | Reported     | Reported     |

Table 5: Characteristics of excluded studies

| Reference          | Publishing year | Guideline developer                                                                                                                                                                                                                                                                                                                                                  | Continent     | Setting                            | Focus area                   | Reason for exclusion                          |
|--------------------|-----------------|----------------------------------------------------------------------------------------------------------------------------------------------------------------------------------------------------------------------------------------------------------------------------------------------------------------------------------------------------------------------|---------------|------------------------------------|------------------------------|-----------------------------------------------|
| Gupta, D. et al.   | 2012            | Indian Chest Society and National College of Chest Physicians                                                                                                                                                                                                                                                                                                        | Asia          | Secondary and tertiary             | Community-acquired pneumonia | Had a scaled domain score of < 60%            |
| Chow, A. et al.    | 2012            | Infectious Disease Society of America (IDSA)                                                                                                                                                                                                                                                                                                                         | North America | Community and emergency department | Sinusitis                    | One EtD criteria reported:<br>1. Resource use |
| Bignell, C. et al. | 2013            | The European Branch of the International Union against Sexually Transmitted Infections (IUSTI Europe); the European Academy of Dermatology and Venereology (EADV); the European Dermatology Forum (EDF); the Union of European Medical Specialists (UEMS). The European Centre for Disease Prevention and Control (ECDC) and the European Office of the World Health | Europe        | Primary care                       | Gonorrhoea                   | Had a scaled domain score of < 60%            |

1  
2  
3  
4  
5  
6  
7  
8  
9  
10  
11  
12  
13  
14  
15  
16  
17  
18  
19  
20  
21  
22  
23  
24  
25  
26  
27  
28  
29  
30  
31  
32  
33  
34  
35  
36  
37  
38  
39  
40  
41  
42  
43  
44  
45  
46  
47

|                                                  |      | Organization (WHO-Europe)                                                                            |               |                                      |                              |                                    |
|--------------------------------------------------|------|------------------------------------------------------------------------------------------------------|---------------|--------------------------------------|------------------------------|------------------------------------|
| Centres for Disease Control and Prevention (CDC) | 2013 | Centre for Disease Control and Prevention (CDC)                                                      | North America | Secondary and tertiary               | Tuberculosis                 | Had a scaled domain score of < 60% |
| Wald, E. R. et al.                               | 2013 | American Academy of Pediatrics                                                                       | North America | Primary, secondary and tertiary care | Sinusitis                    | Had a scaled domain score of < 60% |
| Bignell, C.; Fitzgerald, M.                      | 2011 | British Association for Sexual Health and HIV (BASHH)                                                | Europe        | Tertiary care                        | Gonorrhoea                   | Had a scaled domain score of < 60% |
| Harris, M.                                       | 2011 | British Thoracic Society                                                                             | Europe        | Primary and secondary care           | Community-acquired pneumonia | Had a scaled domain score of < 60% |
| Migliori, G. B. et al.                           | 2012 | European Centre for Disease Prevention and Control (ECDC) and the European Respiratory Society (ERS) | Europe        | Secondary and tertiary care          | Tuberculosis                 | Had a scaled domain score of < 60% |
| Workowski, K. A.; Bolan, G. A.                   | 2015 | Centre for Disease Control and Prevention (CDC)                                                      | North America | Primary, secondary and tertiary care | Gonorrhoea                   | Had a scaled domain score of < 60% |
| Woodhead, M.;                                    | 2011 | European Respiratory Society (ERS), in collaboration with The European Society for Clinical          | Europe        | Primary, secondary and tertiary care | Community-acquired pneumonia | Had a scaled domain score of < 60% |

|                                                                         |      |                                                          |               |                                                                                              |                              |                                                            |
|-------------------------------------------------------------------------|------|----------------------------------------------------------|---------------|----------------------------------------------------------------------------------------------|------------------------------|------------------------------------------------------------|
|                                                                         |      | Microbiology and Infectious Diseases (ESCMID)            |               |                                                                                              |                              |                                                            |
| Spindler, C. et al.                                                     | 2012 | Swedish Society of Infectious                            | Europe        | Secondary care                                                                               | Community-acquired pneumonia | Had a scaled domain score of < 60%                         |
| Desrosiers, M et al.                                                    | 2011 | Canadian Society of Otolaryngology-Head and Neck Surgery | North America | Primary and secondary care                                                                   | Sinusitis                    | Had a scaled domain score of < 60%                         |
| Mayor, M. T.; Roett, M. A.; Uduhiri, K. A.                              | 2012 | American Academy of Family Physicians                    | North America | Primary care                                                                                 | Gonorrhoea                   | Had a scaled domain score of < 60%                         |
| Thwaites, G.                                                            | 2009 | British Infection Society Guidelines                     | Europe        | Secondary and tertiary                                                                       | Tuberculosis                 | Had a scaled domain score of < 60%                         |
| Bignell, C.; Iusti/Who,                                                 | 2009 | IUSTI/WHO                                                | Europe        | Secondary and tertiary                                                                       | Gonorrhoea                   | Had a scaled domain score of < 60%                         |
| Abdul Rahaman, J. A.; Ker, H. B.; Yusof, M.; Hanafi, N. S.; Wong, J. L. | 2012 | Malaysian Family Physician                               | Asia          | Primary care but it should also be useful to those in the secondary/tertiary care.           | Tuberculosis                 | Two EtD criteria reported:<br>1. Values<br>2. Resource use |
| World Health Organization (WHO)                                         | 2014 | World Health Organization (WHO)                          | International | This document is targeted at national TB programmes, paediatricians and other health workers | Tuberculosis                 | Three EtD criteria reported:<br>1. Resource use            |



1  
2  
3  
4  
5  
6  
7  
8  
9  
10  
11  
12  
13  
14  
15  
16  
17  
18  
19  
20  
21  
22  
23  
24  
25  
26  
27  
28  
29  
30  
31  
32  
33  
34  
35  
36  
37  
38  
39  
40  
41  
42  
43  
44  
45  
46  
47

|                                                                             |      |                                                              |               |                                                          |                                            |                                                                                                   |
|-----------------------------------------------------------------------------|------|--------------------------------------------------------------|---------------|----------------------------------------------------------|--------------------------------------------|---------------------------------------------------------------------------------------------------|
|                                                                             |      |                                                              |               | in low- and middle-income countries                      |                                            | 2. Acceptability<br>3. Feasibility                                                                |
| National Institute for Health and Care Excellence (NICE)                    | 2016 | The National Institute for Health and Care Excellence (NICE) | Europe        | Primary, secondary and tertiary                          | Tuberculosis                               | Four EtD criteria reported:<br>1. Values<br>2. Resource use<br>3. Acceptability<br>4. Feasibility |
| Menendez, R. et al.                                                         | 2010 | Spanish Society of Pulmonology and Thoracic Surgery (SEPAR)  | Europe        | n/a                                                      | Community-acquired pneumonia               | Had a scaled domain score of < 60%                                                                |
| Kaplan, J. E.; Benson, C.; Holmes, K. H.; Brooks, J. T.; Pau, A.; Masur, H. | 2009 | Centre for Disease Control and Prevention (CDC)              | North America | Primary, secondary and tertiary settings; high-resource  | Tuberculosis and CAP                       | Had a scaled domain score of < 60%                                                                |
| World Health Organization (WHO)                                             | 2007 | World Health Organization (WHO)                              | International | Resource constraint primary, secondary and tertiary care | Tuberculosis                               | Had a scaled domain score of < 60%                                                                |
| National Institute for Health and Care Excellence (NICE)                    | 2008 | The National Institute for Health and Care Excellence (NICE) | Europe        | Primary care                                             | Otitis media, rhino sinusitis, pharyngitis | Had a scaled domain score of < 60%                                                                |
| British Thoracic Society                                                    | 2009 | British Thoracic Society                                     | Europe        | Primary, secondary and tertiary care                     | Community-acquired pneumonia               | One EtD criteria reported:                                                                        |

|                                                                                                                                          |      |                                                                                                                                          |               |                                                                         |                              |                                                                                |
|------------------------------------------------------------------------------------------------------------------------------------------|------|------------------------------------------------------------------------------------------------------------------------------------------|---------------|-------------------------------------------------------------------------|------------------------------|--------------------------------------------------------------------------------|
|                                                                                                                                          |      |                                                                                                                                          |               |                                                                         |                              | 1. Resource use                                                                |
| Spanish Society for Epidemiology; Spanish Society of Primary Care Physicians; Spanish Society for Pulmonology and Thoracic Surgery, etc. | 2010 | Spanish Society for Epidemiology; Spanish Society of Primary Care Physicians; Spanish Society for Pulmonology and Thoracic Surgery, etc. | Europe        | Primary care                                                            | Tuberculosis                 | Three EtD criteria reported:<br>1. Values<br>2. Resource use<br>3. Feasibility |
| Infectious Disease Society of America (IDSA)                                                                                             | 2011 | Infectious Disease Society of America (IDSA)                                                                                             | North America | Primary, secondary and tertiary care                                    | Community-acquired pneumonia | Had a scaled domain score of < 60%                                             |
| American Academy of Family Physicians                                                                                                    | 2013 | American Academy of Pediatrics                                                                                                           | North America | Primary care                                                            | Otitis media                 | Two EtD criteria reported:<br>1. Values<br>2. Resource use                     |
| National Institute for Health and Clinical Excellence (NICE)                                                                             | 2014 | The National Institute for Health and Care Excellence (NICE)                                                                             | Europe        | Primary, secondary and tertiary                                         | Community-acquired pneumonia | Two EtD criteria reported:<br>1. Values<br>2. Feasibility                      |
| American Academy of Otolaryngology                                                                                                       | 2015 | American Academy of Otolaryngology—                                                                                                      | North America | The guideline is intended for all clinicians who are likely to diagnose | Sinusitis                    | Three EtD criteria reported:<br>1. Values                                      |

1  
2  
3  
4  
5  
6  
7  
8  
9  
10  
11  
12  
13  
14  
15  
16  
17  
18  
19  
20  
21  
22  
23  
24  
25  
26  
27  
28  
29  
30  
31  
32  
33  
34  
35  
36  
37  
38  
39  
40  
41  
42  
43  
44  
45  
46  
47

|                                                              |      |                                                                                                                                                        |               |                                                                                                                                                    |                           |                                                                                  |
|--------------------------------------------------------------|------|--------------------------------------------------------------------------------------------------------------------------------------------------------|---------------|----------------------------------------------------------------------------------------------------------------------------------------------------|---------------------------|----------------------------------------------------------------------------------|
|                                                              |      | Head and Neck Surgery Foundation                                                                                                                       |               | and manage adults with rhinosinusitis and applies to any setting in which an adult with rhinosinusitis would be identified, monitored, or managed. |                           | 2. Resource use<br>3. Acceptability                                              |
| American Academy of Otolaryngology                           | 2016 | American Academy of Otolaryngology—Head and Neck Surgery Foundation, the American Academy of Pediatrics, and the American Academy of Family Physicians | North America | Primary care                                                                                                                                       | Otitis media              | Three EtD criteria reported:<br>1. Values<br>2. Resource use<br>3. Acceptability |
| Infectious Disease Society of America (IDSA)                 | 2016 | Infectious Disease Society of America (IDSA)                                                                                                           | North America | well-resourced; low-incidence settings                                                                                                             | Tuberculosis              | No EtD reported                                                                  |
| The National Institute for Health and Care Excellence (NICE) | 2017 | The National Institute for Health and Care Excellence (NICE)                                                                                           | Europe        | Primary, secondary and tertiary care                                                                                                               | Sinusitis                 | Had a scaled domain score of < 60%                                               |
| Institute for Clinical Systems Improvement                   | 2017 | Institute for Clinical Systems Improvement                                                                                                             | North America | ambulatory care                                                                                                                                    | Pharyngitis and sinusitis | One EtD criteria reported:<br>1. Resource use                                    |

|                                                              |      |                                                              |               |                                                                                                                                                                                                                                                                                                                      |                              |                                    |
|--------------------------------------------------------------|------|--------------------------------------------------------------|---------------|----------------------------------------------------------------------------------------------------------------------------------------------------------------------------------------------------------------------------------------------------------------------------------------------------------------------|------------------------------|------------------------------------|
| The National Institute for Health and Care Excellence (NICE) | 2018 | The National Institute for Health and Care Excellence (NICE) | Europe        | Primary and secondary care (For the treatment of acute uncomplicated otitis media in primary, secondary or other care settings (for example walk-in-centres, urgent care, and minor ailment schemes) either by prescription or by any other legal means of supply of medicine (for example Patient Group Direction). | Otitis media                 | Had a scaled domain score of < 60% |
| British Association for Sexual Health and HIV                | 2019 | British Association for Sexual Health and HIV (BASHH)        | Europe        | The guidelines are primarily aimed at level 3 sexual health services within the United Kingdom (UK) although the principles of the recommendations could be adopted at all levels.                                                                                                                                   | Gonorrhoea                   | Had a scaled domain score of < 60% |
| Ministry of Public Health/Qatar                              | 2016 | Ministry of Public Health of Qatar (MOPH)                    | Asia          | primary care and secondary care settings                                                                                                                                                                                                                                                                             | Community-acquired pneumonia | Had a scaled domain score of < 60% |
| Infectious Disease Society                                   | 2012 | Infectious Disease Society of America (IDSA)                 | North America | healthcare providers who care for adult and pediatric patients                                                                                                                                                                                                                                                       | Pharyngitis                  | One EtD criteria reported:         |

1  
2  
3  
4  
5  
6  
7  
8  
9  
10  
11  
12  
13  
14  
15  
16  
17  
18  
19  
20  
21  
22  
23  
24  
25  
26  
27  
28  
29  
30  
31  
32  
33  
34  
35  
36  
37  
38  
39  
40  
41  
42  
43  
44  
45  
46  
47

|                                                                                |      |                                                                                                                                                                                                                                                                                                     |               |                                             |                              |                                    |
|--------------------------------------------------------------------------------|------|-----------------------------------------------------------------------------------------------------------------------------------------------------------------------------------------------------------------------------------------------------------------------------------------------------|---------------|---------------------------------------------|------------------------------|------------------------------------|
| of America (IDSA)                                                              |      |                                                                                                                                                                                                                                                                                                     |               | with group A streptococcal pharyngitis      |                              | 1. Resource use                    |
| Ministry of Health Malaysia<br>Ministry of Higher Education and private sector | 2012 | Ministry of Health Malaysia<br>Ministry of Higher Education and private sector                                                                                                                                                                                                                      | Asia          | Outpatient, inpatient and community setting | Otitis media                 | No EtD criteria reported           |
| Borisov, A. S et al.                                                           | 2018 | Centre for Disease Control and Prevention (CDC)                                                                                                                                                                                                                                                     | North America | n/a                                         | Tuberculosis                 | Had a scaled domain score of < 60% |
| Lee, M. S. et al.                                                              | 2018 | the Korean Society for Chemotherapy, the Korean Society of Infectious Diseases the Korea Academy of Tuberculosis and Respiratory Diseases, the Korean Association of Family Medicine, the Korean Medical Practitioners Association, and the National Evidence-based Healthcare Collaborating Agency | Asia          | Primary care                                | Community-acquired pneumonia | Had a scaled domain score of < 60% |

|                                                        |      |                                                                                                                                                                                                                |               |                                                                                                                                                 |              |                                                            |
|--------------------------------------------------------|------|----------------------------------------------------------------------------------------------------------------------------------------------------------------------------------------------------------------|---------------|-------------------------------------------------------------------------------------------------------------------------------------------------|--------------|------------------------------------------------------------|
| Pogany, L. et al.                                      | 2015 | Canadian Family Physician                                                                                                                                                                                      | North America | Primary care                                                                                                                                    | Gonorrhoea   | Had a scaled domain score of < 60%                         |
| Stahl, J. P. et al.                                    | 2017 | French Infectious Diseases Society (French acronym SPILF); National educational association for teaching therapeutics (French acronym APNET); French Society of Internal Medicine (French acronym SNFMI), etc. | Europe        | n/a                                                                                                                                             | Tuberculosis | Had a scaled domain score of < 60%                         |
| Heidemann, CH. et al.                                  | 2016 | Danish Health and Medicines Authority and the Danish Society of Otorhinolaryngology, Head and Neck Surgery                                                                                                     | Europe        | primary health care                                                                                                                             | Otitis media | No EtD criteria reported                                   |
| The Scottish Intercollegiate Guidelines Network (SIGN) | 2010 | The Scottish Intercollegiate Guidelines Network (SIGN)                                                                                                                                                         | Europe        | Primary and secondary (general practitioners, nurses, paediatricians, pharmacists, otolaryngologists, anaesthetists, public health specialists) | Pharyngitis  | Two EtD criteria reported:<br>1. Values<br>2. Resource use |

1  
2  
3  
4  
5  
6  
7  
8  
9  
10  
11  
12  
13  
14  
15  
16  
17  
18  
19  
20  
21  
22  
23  
24  
25  
26  
27  
28  
29  
30  
31  
32  
33  
34  
35  
36  
37  
38  
39  
40  
41  
42  
43  
44  
45  
46  
47

|                                       |      |                                                                                                                                                                                                       |               |                                                                                                                                                                          |              |                                                                                                   |
|---------------------------------------|------|-------------------------------------------------------------------------------------------------------------------------------------------------------------------------------------------------------|---------------|--------------------------------------------------------------------------------------------------------------------------------------------------------------------------|--------------|---------------------------------------------------------------------------------------------------|
| World Health Organization (WHO)       | 2011 | World Health Organization (WHO)                                                                                                                                                                       | International | Resource constrained settings                                                                                                                                            | Tuberculosis | Four EtD criteria reported:<br>1. Values<br>2. Resource use<br>3. Acceptability<br>4. Feasibility |
| American Academy of Otolaryngology    | 2015 | American Academy of Otolaryngology                                                                                                                                                                    | North America | (Primary, secondary and tertiary care) any setting in which an adult with rhinosinusitis would be identified                                                             | Sinusitis    | Two EtD criteria reported:<br>1. Values<br>2. Resource use                                        |
| Morbidity and Mortality Weekly Report | 2009 | CDC, the National Institutes of Health, the HIV Medicine Association of the Infectious Diseases Society of America, the Pediatric Infectious Diseases Society, and the American Academy of Pediatrics | North America | These guidelines are intended for use by clinicians and other health-care workers providing medical care for HIV-exposed and HIV-infected children in the United States. | Tuberculosis | Had a scaled domain score of < 60%                                                                |
| Public Health Agency of Canada        | 2014 | Association of Medical Microbiology and Infectious Disease Canada (AMMI Canada)                                                                                                                       | North America | Primary and secondary                                                                                                                                                    | Tuberculosis | Had a scaled domain score of < 60%                                                                |

|                                                              |      |                                                                                                                                                               |               |                                                                                                                                                      |                              |                                               |
|--------------------------------------------------------------|------|---------------------------------------------------------------------------------------------------------------------------------------------------------------|---------------|------------------------------------------------------------------------------------------------------------------------------------------------------|------------------------------|-----------------------------------------------|
| BC Centre for Disease Control                                | 2014 | British Columbia Centre for Disease Control (BCCDC)                                                                                                           | North America | (Primary care) clinicians and public health professionals regarding care and treatment of STIs in British Columbia                                   | Gonorrhoea                   | Had a scaled domain score of < 60%            |
| Centres for Disease Control and Prevention                   | 2019 | Centers for Disease Control and Prevention, the National Institutes of Health, and the HIV Medicine Association of the Infectious Diseases Society of America | North America | Primary, secondary and tertiary                                                                                                                      | Tuberculosis                 | Had a scaled domain score of < 60%            |
| Infectious Disease Society of America (IDSA)                 | 2011 | Infectious Disease Society of America (IDSA)                                                                                                                  | North America | Secondary and tertiary                                                                                                                               | Community-acquired pneumonia | Had a scaled domain score of < 60%            |
| The National Institute for Health and Care Excellence (NICE) | 2018 | The National Institute for Health and Care Excellence (NICE)                                                                                                  | Europe        | Primary, secondary and tertiary (in primary, secondary or other care settings (for example walk-in-centres, urgent care, and minor ailment schemes)) | Pharyngitis                  | One EtD criteria reported:<br>1. Resource use |
| World Health Organization (WHO)                              | 2016 | World Health Organization (WHO)                                                                                                                               | International | low- and middle-income countries                                                                                                                     | Tuberculosis                 | Recommendations do not consider resistance    |



1  
2  
3  
4  
5  
6  
7  
8  
9  
10  
11  
12  
13  
14  
15  
16  
17  
18  
19  
20  
21  
22  
23  
24  
25  
26  
27  
28  
29  
30  
31  
32  
33  
34  
35  
36  
37  
38  
39  
40  
41  
42  
43  
44  
45  
46  
47

|                                                              |      |                                                                                                                                                                                                     |               |                                                                                                                                                                                                             |                              |                                               |
|--------------------------------------------------------------|------|-----------------------------------------------------------------------------------------------------------------------------------------------------------------------------------------------------|---------------|-------------------------------------------------------------------------------------------------------------------------------------------------------------------------------------------------------------|------------------------------|-----------------------------------------------|
| Public Health Agency of Canada (PHAC)                        | 2014 | Public Health Agency of Canada (PHAC)                                                                                                                                                               | North America | n/a                                                                                                                                                                                                         | Gonorrhoea                   | Had a scaled domain score of < 60%            |
| The National Institute for Health and Care Excellence (NICE) | 2019 | The National Institute for Health and Care Excellence (NICE)                                                                                                                                        | Europe        | Primary care settings (for example walk-in-centres, urgent care, and minor ailment schemes) either by prescription or by any other legal means of supply of medicine (for example patient group direction). | Community-acquired pneumonia | No EtD criteria reported                      |
| Centers for Disease Control and Prevention (CDC)             | 2013 | National Institutes of Health, Centers for Disease Control and Prevention, the HIV Medicine Association of the Infectious Diseases Society of America and the Pediatric Infectious Diseases Society | North America | Primary care; high-resource settings                                                                                                                                                                        | Tuberculosis                 | One EtD criteria reported:<br>1. Resource use |
| Ministry of Health Singapore                                 | 2016 | Ministry of Health, Singapore                                                                                                                                                                       | Asia          | (primary secondary and tertiary) various (all healthcare practitioners)                                                                                                                                     | Tuberculosis                 | Had a scaled domain score of < 60%            |
| University of Michigan Health System                         | 2013 | Michigan Medicine. University of Michigan                                                                                                                                                           | North America | Primary care                                                                                                                                                                                                | Pharyngitis                  | Had a scaled domain score of < 60%            |

|                                                    |      |                                                                                                                                         |               |                                                                                           |                              |                                                                                  |
|----------------------------------------------------|------|-----------------------------------------------------------------------------------------------------------------------------------------|---------------|-------------------------------------------------------------------------------------------|------------------------------|----------------------------------------------------------------------------------|
| AHRQ - Agency for Healthcare Research + Quality,   | 2008 | The National Institute for Health and Care Excellence (NICE); National Collaborating Centre for Women's and Children's Health (NCC-WCH) | Europe        | Primary care and secondary care setting (including both community and hospital settings). | Otitis media                 | Three EtD criteria reported:<br>1. Resource use<br>2. Acceptability<br>3. Equity |
| British Columbia Centre for Excellence in HIV/AIDS | 2015 | British Columbia Centre for Excellence in HIV/AIDS                                                                                      | North America | Primary care                                                                              | Tuberculosis                 | Had a scaled domain score of < 60%                                               |
| Kawaguchi, R. et al.                               | 2019 | Japan Society of Obstetrics and Gynecology (JSOG) and Japan Association of Obstetricians and Gynecologists (JAOG)                       | Asia          | Primary care (gynecological outpatient care.)                                             | Gonorrhoea                   | Recommendations do not consider resistance                                       |
| Mandell, L. A. et al.                              | 2007 | Infectious Disease Society of America (IDSA)                                                                                            | North America | Emergency medicine physicians, hospitalists, and primary care practitioners               | Community-acquired pneumonia | Had a scaled domain score of < 60%                                               |
| Public Health Ontario                              | 2018 | Public Health Ontario (PHO)                                                                                                             | North America | Primary care                                                                              | Gonorrhoea                   | Unable to provide supplementary materials                                        |
| Wiersinga, W. J. et al.                            | 2017 | The Dutch Working Party on Antibiotic Policy or Stichting                                                                               | Europe        | This guideline is meant for the treatment of adult                                        | Community-acquired pneumonia | Had a scaled domain score of < 60%                                               |

1  
2  
3  
4  
5  
6  
7  
8  
9  
10  
11  
12  
13  
14  
15  
16  
17  
18  
19  
20  
21  
22  
23  
24  
25  
26  
27  
28  
29  
30  
31  
32  
33  
34  
35  
36  
37  
38  
39  
40  
41  
42  
43  
44  
45  
46  
47

|                                     |      |                                                                                       |               |                                                                                                                                                                                                                                                                                                                                       |                              |                                                           |
|-------------------------------------|------|---------------------------------------------------------------------------------------|---------------|---------------------------------------------------------------------------------------------------------------------------------------------------------------------------------------------------------------------------------------------------------------------------------------------------------------------------------------|------------------------------|-----------------------------------------------------------|
|                                     |      | Werkgroep Antibiotica Beleid (SWAB) and Dutch Association of Chest Physicians (NVALT) |               | patients who present themselves at the hospital, and are treated as outpatients, as well as for hospitalized patients up to 72 hours after admission, and is in full accordance with the 2011 NHG practice guideline for GPs <sup>2</sup> . The given recommendations are applicable to adult patients with a CAP in the Netherlands. |                              |                                                           |
| U.S. Preventive Services Task Force | 2019 | United States Preventative Task Force (USPTF)                                         | North America | primary care                                                                                                                                                                                                                                                                                                                          | Gonorrhoea                   | Two EtD criteria reported:<br>1. Feasibility<br>2. Equity |
| World Health Organization (WHO)     | 2012 | World Health Organization (WHO)                                                       | International | primary care & low- and middle-income countries                                                                                                                                                                                                                                                                                       | Tuberculosis                 | Recommendations do not consider resistance                |
| Athlin, S. et al.                   | 2017 | The Swedish Society of Infectious Diseases                                            | Europe        | These guidelines apply to the in-hospital treatment of adult non-immunocompromised patients with CAP.                                                                                                                                                                                                                                 | Community-acquired pneumonia | Had a scaled domain score of < 60%                        |

|                      |      |                                                                                                                                                                                                                            |         |                                                                                                                                                                                                                                              |                                                                    |                                            |
|----------------------|------|----------------------------------------------------------------------------------------------------------------------------------------------------------------------------------------------------------------------------|---------|----------------------------------------------------------------------------------------------------------------------------------------------------------------------------------------------------------------------------------------------|--------------------------------------------------------------------|--------------------------------------------|
| Boyles, T. H. et al. | 2017 | South African Thoracic Society (SATS) and the Federation of Infectious Diseases Societies of Southern Africa (FIDSSA).                                                                                                     | Africa  | Primary and secondary care                                                                                                                                                                                                                   | Community-acquired pneumonia                                       | Had a scaled domain score of < 60%         |
| Chaves NJ. et al.    | 2016 | The Australasian Society for Infectious Diseases (ASID) National Tuberculosis Advisory Committee (NTAC) Royal Australasian College of Physicians (RACP) The Australasian Chapter of Sexual Health Medicine (AChSHM – RACP) | Oceania | Primary, secondary and tertiary intended for healthcare providers who care for people from refugee-like backgrounds, including general practitioners, refugee health nurses, refugee health specialists, Infectious Diseases (ID) physicians | Tuberculosis and gonorrhoea                                        | Had a scaled domain score of < 60%         |
| Chiappini, E. et al. | 2013 | Italian Society of Preventive and Social Pediatrics                                                                                                                                                                        | Europe  | Primary care (primary care pediatricians and general practice physicians)                                                                                                                                                                    | Pharyngitis; sinusitis; community acquired pneumonia; otitis media | Had a scaled domain score of < 60%         |
| Di Comite, A. et al. | 2016 | Italian Pediatric TB Study Group                                                                                                                                                                                           | Europe  | primary and secondary care                                                                                                                                                                                                                   | Tuberculosis                                                       | Recommendations do not consider resistance |

1  
2  
3  
4  
5  
6  
7  
8  
9  
10  
11  
12  
13  
14  
15  
16  
17  
18  
19  
20  
21  
22  
23  
24  
25  
26  
27  
28  
29  
30  
31  
32  
33  
34  
35  
36  
37  
38  
39  
40  
41  
42  
43  
44  
45  
46  
47

|                                                                                    |      |                                                                                                        |                  |                               |                                  |                                          |
|------------------------------------------------------------------------------------|------|--------------------------------------------------------------------------------------------------------|------------------|-------------------------------|----------------------------------|------------------------------------------|
| Jereb, J. A.;<br>Goldberg, S. V.;<br>Powell, K.;<br>Villarino, M. E.;<br>Lobue, P. | 2011 | Centre for Disease<br>Control and<br>Prevention (CDC)                                                  | North<br>America | Primary and<br>secondary care | Tuberculosis                     | Had a scaled<br>domain score of <<br>60% |
| Ricardo de<br>Amorim Corrêa.<br>et al.                                             | 2009 | Scientific Board and<br>Respiratory Infection<br>Committee of the<br>Brazilian Thoracic<br>Association | South<br>America | Primary and<br>secondary care | Community-<br>acquired pneumonia | Had a scaled<br>domain score of <<br>60% |
| Z.A. Memish. et<br>al.                                                             | 2007 | THE GCC CAP<br>WORKING GROUP<br>(GCC-CAPWG)                                                            | Asia             | Primary and<br>secondary care | Community-<br>acquired pneumonia | Had a scaled<br>domain score of <<br>60% |

Peer review only

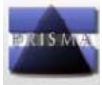

# PRISMA 2009 Checklist

| Section/topic                      | #  | Checklist item                                                                                                                                                                                                                                                                                              | Reported on page #          |
|------------------------------------|----|-------------------------------------------------------------------------------------------------------------------------------------------------------------------------------------------------------------------------------------------------------------------------------------------------------------|-----------------------------|
| <b>TITLE</b>                       |    |                                                                                                                                                                                                                                                                                                             |                             |
| Title                              | 1  | Identify the report as a systematic review, meta-analysis, or both.                                                                                                                                                                                                                                         | 1                           |
| <b>ABSTRACT</b>                    |    |                                                                                                                                                                                                                                                                                                             |                             |
| Structured summary                 | 2  | Provide a structured summary including, as applicable: background; objectives; data sources; study eligibility criteria, participants, and interventions; study appraisal and synthesis methods; results; limitations; conclusions and implications of key findings; systematic review registration number. | 3                           |
| <b>INTRODUCTION</b>                |    |                                                                                                                                                                                                                                                                                                             |                             |
| Rationale                          | 3  | Describe the rationale for the review in the context of what is already known.                                                                                                                                                                                                                              | 5-6                         |
| Objectives                         | 4  | Provide an explicit statement of questions being addressed with reference to participants, interventions, comparisons, outcomes, and study design (PICOS).                                                                                                                                                  | 6                           |
| <b>METHODS</b>                     |    |                                                                                                                                                                                                                                                                                                             |                             |
| Protocol and registration          | 5  | Indicate if a review protocol exists, if and where it can be accessed (e.g., Web address), and, if available, provide registration information including registration number.                                                                                                                               | 11                          |
| Eligibility criteria               | 6  | Specify study characteristics (e.g., PICOS, length of follow-up) and report characteristics (e.g., years considered, language, publication status) used as criteria for eligibility, giving rationale.                                                                                                      | 6-7                         |
| Information sources                | 7  | Describe all information sources (e.g., databases with dates of coverage, contact with study authors to identify additional studies) in the search and date last searched.                                                                                                                                  | 7                           |
| Search                             | 8  | Present full electronic search strategy for at least one database, including any limits used, such that it could be repeated.                                                                                                                                                                               | 7, and supplement pages 4-7 |
| Study selection                    | 9  | State the process for selecting studies (i.e., screening, eligibility, included in systematic review, and, if applicable, included in the meta-analysis).                                                                                                                                                   | 6-8                         |
| Data collection process            | 10 | Describe method of data extraction from reports (e.g., piloted forms, independently, in duplicate) and any processes for obtaining and confirming data from investigators.                                                                                                                                  | 8-10                        |
| Data items                         | 11 | List and define all variables for which data were sought (e.g., PICOS, funding sources) and any assumptions and simplifications made.                                                                                                                                                                       | 8-10, and supplement page 8 |
| Risk of bias in individual studies | 12 | Describe methods used for assessing risk of bias of individual studies (including specification of whether this was done at the study or outcome level), and how this information is to be used in any data synthesis.                                                                                      | 10                          |
| Summary measures                   | 13 | State the principal summary measures (e.g., risk ratio, difference in means).                                                                                                                                                                                                                               | 10-11                       |

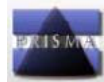

# PRISMA 2009 Checklist

|                      |    |                                                                                                                                                           |     |
|----------------------|----|-----------------------------------------------------------------------------------------------------------------------------------------------------------|-----|
| Synthesis of results | 14 | Describe the methods of handling data and combining results of studies, if done, including measures of consistency (e.g., $I^2$ ) for each meta-analysis. | n/a |
|----------------------|----|-----------------------------------------------------------------------------------------------------------------------------------------------------------|-----|

Page 1 of 2

| Section/topic                 | #  | Checklist item                                                                                                                                                                                           | Reported on page # |
|-------------------------------|----|----------------------------------------------------------------------------------------------------------------------------------------------------------------------------------------------------------|--------------------|
| Risk of bias across studies   | 15 | Specify any assessment of risk of bias that may affect the cumulative evidence (e.g., publication bias, selective reporting within studies).                                                             | n/a                |
| Additional analyses           | 16 | Describe methods of additional analyses (e.g., sensitivity or subgroup analyses, meta-regression), if done, indicating which were pre-specified.                                                         | n/a                |
| <b>RESULTS</b>                |    |                                                                                                                                                                                                          |                    |
| Study selection               | 17 | Give numbers of studies screened, assessed for eligibility, and included in the review, with reasons for exclusions at each stage, ideally with a flow diagram.                                          | 11                 |
| Study characteristics         | 18 | For each study, present characteristics for which data were extracted (e.g., study size, PICOS, follow-up period) and provide the citations.                                                             | 11-12              |
| Risk of bias within studies   | 19 | Present data on risk of bias of each study and, if available, any outcome level assessment (see item 12).                                                                                                | 14                 |
| Results of individual studies | 20 | For all outcomes considered (benefits or harms), present, for each study: (a) simple summary data for each intervention group (b) effect estimates and confidence intervals, ideally with a forest plot. | 11-15              |
| Synthesis of results          | 21 | Present results of each meta-analysis done, including confidence intervals and measures of consistency.                                                                                                  | n/a                |
| Risk of bias across studies   | 22 | Present results of any assessment of risk of bias across studies (see Item 15).                                                                                                                          | 14                 |
| Additional analysis           | 23 | Give results of additional analyses, if done (e.g., sensitivity or subgroup analyses, meta-regression [see Item 16]).                                                                                    | n/a                |
| <b>DISCUSSION</b>             |    |                                                                                                                                                                                                          |                    |
| Summary of evidence           | 24 | Summarize the main findings including the strength of evidence for each main outcome; consider their relevance to key groups (e.g., healthcare providers, users, and policy makers).                     | 15-16              |
| Limitations                   | 25 | Discuss limitations at study and outcome level (e.g., risk of bias), and at review-level (e.g., incomplete retrieval of identified research, reporting bias).                                            | 17                 |
| Conclusions                   | 26 | Provide a general interpretation of the results in the context of other evidence, and implications for future research.                                                                                  | 19                 |
| <b>FUNDING</b>                |    |                                                                                                                                                                                                          |                    |
| Funding                       | 27 | Describe sources of funding for the systematic review and other support (e.g., supply of data); role of funders for the systematic review.                                                               | 20                 |

From: Moher D, Liberati A, Tetzlaff J, Altman DG, The PRISMA Group (2009). Preferred Reporting Items for Systematic Reviews and Meta-Analyses: The PRISMA Statement. PLoS Med 6(6): e1000097. doi:10.1371/journal.pmed1000097

For peer review only - <http://bmjopen.bmj.com/site/about/guidelines.xhtml>  
For more information, visit: [www.prisma-statement.org](http://www.prisma-statement.org)

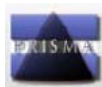

# PRISMA 2009 Checklist

For peer review only

- 1
- 2
- 3
- 4
- 5
- 6
- 7
- 8
- 9
- 10
- 11
- 12
- 13
- 14
- 15
- 16
- 17
- 18
- 19
- 20
- 21
- 22
- 23
- 24
- 25
- 26
- 27
- 28
- 29
- 30
- 31
- 32
- 33
- 34
- 35
- 36
- 37
- 38
- 39
- 40
- 41
- 42
- 43
- 44
- 45
- 46
- 47



# BMJ Open

## Consideration of antimicrobial resistance and contextual factors in infectious disease guidelines: a systematic survey

|                                 |                                                                                                                                                                                                                                                                                                                                                                                                                                                                                                                                                                                                                                                                                                                                                                                                                                                                                                                                                                                                                                                                                                                                                                                                                                                                                                                                                                            |
|---------------------------------|----------------------------------------------------------------------------------------------------------------------------------------------------------------------------------------------------------------------------------------------------------------------------------------------------------------------------------------------------------------------------------------------------------------------------------------------------------------------------------------------------------------------------------------------------------------------------------------------------------------------------------------------------------------------------------------------------------------------------------------------------------------------------------------------------------------------------------------------------------------------------------------------------------------------------------------------------------------------------------------------------------------------------------------------------------------------------------------------------------------------------------------------------------------------------------------------------------------------------------------------------------------------------------------------------------------------------------------------------------------------------|
| Journal:                        | <i>BMJ Open</i>                                                                                                                                                                                                                                                                                                                                                                                                                                                                                                                                                                                                                                                                                                                                                                                                                                                                                                                                                                                                                                                                                                                                                                                                                                                                                                                                                            |
| Manuscript ID                   | bmjopen-2020-046097.R1                                                                                                                                                                                                                                                                                                                                                                                                                                                                                                                                                                                                                                                                                                                                                                                                                                                                                                                                                                                                                                                                                                                                                                                                                                                                                                                                                     |
| Article Type:                   | Original research                                                                                                                                                                                                                                                                                                                                                                                                                                                                                                                                                                                                                                                                                                                                                                                                                                                                                                                                                                                                                                                                                                                                                                                                                                                                                                                                                          |
| Date Submitted by the Author:   | 12-May-2021                                                                                                                                                                                                                                                                                                                                                                                                                                                                                                                                                                                                                                                                                                                                                                                                                                                                                                                                                                                                                                                                                                                                                                                                                                                                                                                                                                |
| Complete List of Authors:       | Stalteri, Rosa; McMaster University, Department of Health Research Methods, Evidence and Impact<br>Santesso, Nancy; McMaster University, Department of Health Research Methods, Evidence and Impact<br>Bognanni, Antonio; McMaster University, Department of Health Research Methods, Evidence and Impact<br>Darzi, Andrea; McMaster University, Department of Health Research Methods, Evidence and Impact<br>Karam, Samer; McMaster University, Department of Health Research Methods, Evidence and Impact<br>Piggott, Thomas; McMaster University, Department of Health Research Methods, Evidence and Impact<br>Baldeh, Tejan; McMaster University Faculty of Health Sciences, Department of Health Research Methods, Evidence, and Impact (HEI)<br>Schunemann, Finn; McMaster University, Michael G. DeGroot Cochrane Canada and MacGRADE Centres<br>Ventresca, Matthew; McMaster University, Department of Health Research Methods, Evidence and Impact<br>Morgano, Gian Paolo; McMaster University, Department of Health Research Methods, Evidence and Impact<br>MOJA, Lorenzo; World Health Organization, Department of Health Product Policy and Standards<br>Loeb, Mark; McMaster University, Department of Health Research Methods, Evidence and Impact<br>Schunemann, Holger; McMaster University, Department of Health Research Methods, Evidence and Impact |
| <b>Primary Subject Heading</b>: | Global health                                                                                                                                                                                                                                                                                                                                                                                                                                                                                                                                                                                                                                                                                                                                                                                                                                                                                                                                                                                                                                                                                                                                                                                                                                                                                                                                                              |
| Secondary Subject Heading:      | Public health, Sexual health, Respiratory medicine, Infectious diseases                                                                                                                                                                                                                                                                                                                                                                                                                                                                                                                                                                                                                                                                                                                                                                                                                                                                                                                                                                                                                                                                                                                                                                                                                                                                                                    |
| Keywords:                       | Tuberculosis < INFECTIOUS DISEASES, Respiratory infections < THORACIC MEDICINE, Protocols & guidelines < HEALTH SERVICES ADMINISTRATION & MANAGEMENT, INFECTIOUS DISEASES                                                                                                                                                                                                                                                                                                                                                                                                                                                                                                                                                                                                                                                                                                                                                                                                                                                                                                                                                                                                                                                                                                                                                                                                  |
|                                 |                                                                                                                                                                                                                                                                                                                                                                                                                                                                                                                                                                                                                                                                                                                                                                                                                                                                                                                                                                                                                                                                                                                                                                                                                                                                                                                                                                            |

1  
2  
3  
4  
5  
6  
7  
8  
9  
10  
11  
12  
13  
14  
15  
16  
17  
18  
19  
20  
21  
22  
23  
24  
25  
26  
27  
28  
29  
30  
31  
32  
33  
34  
35  
36  
37  
38  
39  
40  
41  
42  
43  
44  
45  
46  
47  
48  
49  
50  
51  
52  
53  
54  
55  
56  
57  
58  
59  
60

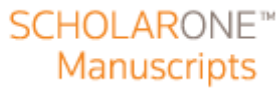

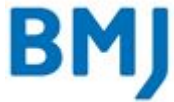

I, the Submitting Author has the right to grant and does grant on behalf of all authors of the Work (as defined in the below author licence), an exclusive licence and/or a non-exclusive licence for contributions from authors who are: i) UK Crown employees; ii) where BMJ has agreed a CC-BY licence shall apply, and/or iii) in accordance with the terms applicable for US Federal Government officers or employees acting as part of their official duties; on a worldwide, perpetual, irrevocable, royalty-free basis to BMJ Publishing Group Ltd ("BMJ") its licensees and where the relevant Journal is co-owned by BMJ to the co-owners of the Journal, to publish the Work in this journal and any other BMJ products and to exploit all rights, as set out in our [licence](#).

The Submitting Author accepts and understands that any supply made under these terms is made by BMJ to the Submitting Author unless you are acting as an employee on behalf of your employer or a postgraduate student of an affiliated institution which is paying any applicable article publishing charge ("APC") for Open Access articles. Where the Submitting Author wishes to make the Work available on an Open Access basis (and intends to pay the relevant APC), the terms of reuse of such Open Access shall be governed by a Creative Commons licence – details of these licences and which [Creative Commons](#) licence will apply to this Work are set out in our licence referred to above.

Other than as permitted in any relevant BMJ Author's Self Archiving Policies, I confirm this Work has not been accepted for publication elsewhere, is not being considered for publication elsewhere and does not duplicate material already published. I confirm all authors consent to publication of this Work and authorise the granting of this licence.

1  
2  
3 **Consideration of antimicrobial resistance and contextual factors in infectious disease**  
4 **guidelines: a systematic survey**  
5

6 Rosa Stalteri<sup>1,3</sup>, MPH, Nancy Santesso<sup>1,2,3</sup>, PhD, Antonio Bognanni<sup>1</sup>, MD, Andrea J. Darzi<sup>1</sup>, MD,  
7  
8 PhD, Samer G. Karam<sup>1</sup>, MD, Thomas Piggott<sup>1,2,5</sup>, MD, Tejan Baldeh<sup>3</sup>, MPH, Finn C.  
9  
10 Schünemann<sup>3,8</sup>, MD, Matthew Ventresca<sup>1,3</sup>, MSc, Gian Paolo Morgano<sup>1,3</sup>, PhD, Lorenzo Moja<sup>6</sup>,  
11  
12 MD, PhD, Prof Mark Loeb<sup>1,2,3,4,5</sup>, MD, Prof Holger J. Schünemann<sup>1,2,3,7</sup>, MD, PhD  
13

- 14  
15  
16 1. Department of Health Research Methods, Evidence and Impact, Faculty of Health  
17  
18 Sciences, McMaster University, Hamilton (ON), Canada  
19  
20 2. WHO Collaborating Centre for Infectious Diseases, Research Methods and  
21  
22 Recommendations  
23  
24 3. Michael G. DeGroot Cochrane Canada and MacGRADE Centres, McMaster University,  
25  
26 Hamilton (ON), Canada  
27  
28 4. Department of Pathology and Molecular Medicine, McMaster University, Hamilton  
29  
30 (ON), Canada  
31  
32 5. Michael G. DeGroot Institute for Infectious Disease Research, McMaster University,  
33  
34 Hamilton (ON), Canada  
35  
36 6. Department of Health Product Policy and Standards, World Health Organization, Geneva  
37  
38 1211, Switzerland.  
39  
40 7. Department of Medicine, McMaster University, Hamilton (ON), Canada  
41  
42  
43 8. Institut für Evidence in Medicine, Medical Center & Faculty of Medicine, University of  
44  
45 Freiburg, Freiburg, Germany.  
46  
47  
48  
49

50 Corresponding author:  
51 Prof. Holger Schünemann  
52 WHO Collaborating Centre for Infectious Diseases, Research Methods and Recommendations  
53  
54  
55  
56  
57  
58  
59

1  
2  
3 Michael G DeGroot Cochrane Canada and McMaster GRADE centres; Department of Health  
4 Research Methods, Evidence and Impact, McMaster University, HSC-2C, 1280 Main St West;  
5 Hamilton, ON L8N 3Z5, Canada.

6 E-mail: [holger.schunemann@mcmaster.ca](mailto:holger.schunemann@mcmaster.ca)

7 Tel: +1 905 525 9140 x 24931

8 Fax: 1 905 522 9507  
9  
10  
11

12 Main text word count: 3258  
13

14 Abstract word count: 254  
15

16 Reference count: 106  
17  
18  
19  
20  
21  
22  
23  
24  
25  
26  
27  
28  
29  
30  
31  
32  
33  
34  
35  
36  
37  
38  
39  
40  
41  
42  
43  
44  
45  
46  
47  
48  
49  
50  
51  
52  
53  
54  
55  
56  
57  
58  
59  
60

1  
2  
3 **Abstract (word count = 258/300)**  
4  
5

6 **Objectives:** Guidelines that include antimicrobial recommendations should explicitly consider  
7  
8 contextual factors that influence antimicrobial resistance and their downstream effects on  
9  
10 resistance selection. The objectives were to analyze a) how, and to what extent, tuberculosis,  
11  
12 gonorrhoea, and respiratory tract infection guidelines are considering antimicrobial resistance; b)  
13  
14 are of acceptable quality; and c) if they can be easily contextualized to fit the needs of specific  
15  
16 populations and health systems.  
17  
18

19  
20  
21 **Methods:** We conducted a systematic review and searched Ovid MEDLINE and Embase from  
22  
23 January 1, 2007 to June 7, 2019 for tuberculosis, gonorrhoea, and respiratory tract infection  
24  
25 guidelines published in English. We also searched guideline databases, key websites, and  
26  
27 reference lists. We identified guidelines and recommendations that considered contextual factors  
28  
29 including antimicrobial resistance, values, resource use, equity, acceptability, and feasibility. We  
30  
31 assessed quality of the guidelines using the Appraisal of Guidelines for Research and Evaluation  
32  
33 II tool focusing on the domains scope and purpose, rigour of development, and editorial  
34  
35 independence. PROSPERO, registration CRD42020145235.  
36  
37  
38

39  
40  
41 **Results:** We screened 10,365 records, of which 74 guidelines met inclusion criteria. Of these  
42  
43 guidelines, 39% (n = 29/74) met acceptable quality scores. Approximately two thirds of  
44  
45 recommendations considered antimicrobial resistance at the population- and/or outcome-level.  
46  
47 Five of the 29 guidelines reported all factors required for recommendation contextualization.  
48  
49 Equity was the least considered across guidelines.  
50  
51

52  
53 **Discussion:** Relatively few guidelines for highly prevalent infectious diseases are considering  
54  
55 resistance at a local level, and many do not consider contextual factors necessary for appropriate  
56  
57  
58  
59  
60

1  
2  
3 antimicrobial use. Improving the quality of guidelines targeting specific regional areas is  
4  
5 required.  
6  
7

### 8 **Strengths and limitations of this study**

- 9  
10  
11
- 12 • This is the first study to assess whether guidelines are considering local dimensions such as  
13 antimicrobial resistance.  
14
  - 15 • We employed systematic methods and used established frameworks to assess the credibility  
16 of guidelines.  
17
  - 18 • By focusing on three key AGREE II domains and a relatively low score we were inclusive  
19 but we included only English language publications.  
20
  - 21 • The use of the credibility cut-off score of 60% or greater for three of the six AGREE II  
22 domains is based on limited guidance on cut-off thresholds.  
23
  - 24 • We used criteria of the GRADE Evidence to Decision Frameworks that are fairly general as  
25 they apply to any interventions and may need to be complemented with specific criteria  
26 related to the antimicrobial field.  
27  
28  
29  
30  
31  
32  
33  
34  
35  
36  
37  
38  
39  
40  
41  
42

43 **Registration:** International Prospective Register of Systematic Reviews (PROSPERO),  
44 CRD42020145235.  
45

46  
47 **Funding:** Michael G. DeGroot Cochrane Canada and McMaster GRADE centres (no specific  
48 award/grant number).  
49

50  
51  
52 **Keywords:** Antimicrobial resistance, tuberculosis, gonorrhoea, respiratory tract infections,  
53 guidelines, recommendations, contexts, GRADE.  
54  
55  
56  
57  
58  
59  
60

## Introduction

Antimicrobials are essential to protecting human health. Their effectiveness is under threat due to antimicrobial resistance (AMR), resulting from misuse of antimicrobials over several decades.

At the 2015 United Nations General Assembly, member states committed to address AMR by adopting national plans centered on five strategic objectives outlined in the World Health Organization's (WHO) Global Action Plan (1, 2). The fourth objective of this plan is to implement national and hospital treatment guidelines for the optimization of antimicrobial medicines use (2). Guidelines are among AMR stewardship interventions intended to modify clinician behavior by providing guidance on when, and how, to prescribe antimicrobials, integrating information on antimicrobial consumption, resistance surveillance, research and development, and burden of resistance (3-5).

Preservation of antimicrobials requires the consideration of how, and under what conditions, is it appropriate to recommend antimicrobials. However, only a small number of recently published guidelines considered epidemiological and resistance pattern data (6). There are also concerns that guidelines are not considering important contextual factors, including evidence on values, resource use, equity, acceptability, and feasibility that go beyond resistance patterns and that may influence secular trends in AMR (7, 8). For example, guideline recommendations are likely to better support effective use of antimicrobials in specific contexts when they account for how much people value the affected health outcomes ("values"), antimicrobial resistance burden, public health infrastructure, local medicine policies for consistent access to safe, effective, affordable medicines, and equitability of antimicrobial regimens (9). Considering these factors is also relevant for adapting and implementing. The failure to account for these factors likely



1  
2  
3 results from the lack of formal guidance for developing recommendations that consider AMR  
4  
5 and other local factors.  
6

7  
8  
9 Incomplete reporting of evidence supporting recommendations, and the existing belief that  
10  
11 guideline developers must develop their recommendations ‘from scratch’, results in additional  
12  
13 challenges. Scientific societies and other organizations duplicate the same work to develop  
14  
15 recommendations resulting in multiple guidelines on the same topic, confusion and loss of  
16  
17 confidence by clinicians, and resource waste (8, 10). However, guideline processes can become  
18  
19 more effective, if they can be effectively adapted by others. This process requires transparent  
20  
21 reporting of how the guideline development groups moved from evidence to recommendations,  
22  
23 and properly include AMR. Formal processes for adaptation permit societies and organizations  
24  
25 to capitalize on existing evidence evaluation and interpretation by considering important  
26  
27 contextual factors, among which AMR is the most noticeable. This would reduce cost and  
28  
29 redundancy (7).  
30  
31  
32  
33  
34

35 Our objectives were to analyze how, and to what extent, tuberculosis, gonorrhoea, and  
36  
37 respiratory tract infection guidelines are considering antimicrobial resistance; are of acceptable  
38  
39 methodological quality; and if they can be easily contextualized to fit the needs of specific  
40  
41 populations.  
42  
43  
44

## 45 **Methods**

### 46 47 48 **SELECTION CRITERIA AND SEARCH STRATEGY**

49  
50  
51 We selected three types of infection: tuberculosis (TB), gonorrhoea, and respiratory tract  
52  
53 infections, specifically otitis media, pharyngitis, sinusitis, and community-acquired pneumonia.  
54  
55  
56  
57  
58  
59  
60

1  
2  
3 These infections are a public health priority because they are becoming increasingly harder to  
4 treat due to AMR and/or are treated inappropriately, leading to higher risk of toxicity or  
5  
6 resistance development. Harder to treat drug-resistant TB strains are increasing and projected to  
7  
8 account for a quarter of all TB deaths by 2050 (11). *Neisseria gonorrhoea* is an urgent public  
9  
10 health threat (12). The international spread of resistance to the last effective therapy, ceftriaxone,  
11  
12 and azithromycin, threatens sustained treatment of gonorrhoea (13, 14). Otitis media,  
13  
14 pharyngitis, sinusitis, and community-acquired pneumonia are prevalent and *Streptococcus*  
15  
16 *pneumoniae* (the main causal microorganism), was classified as a serious public health threat due  
17  
18 to resistance observed by inappropriate use of antibiotics (12, 15, 16). All these syndromes have  
19  
20 been prioritized by WHO as part of Access, Watch, and Reserve (AWaRe) — a new  
21  
22 classification system that supports a more nuanced approach to target inappropriate use of broad  
23  
24 spectrum “Watch” antibiotics (17).  
25  
26  
27  
28  
29

30  
31 We included English language guidelines published between 2007 and 2019 on the above  
32  
33 selected infections. We restricted to English language guidelines because, from a practical  
34  
35 standpoint, English language publications would be the simplest to contextualize for most  
36  
37 international groups and the major international organizations like WHO publish their guidelines  
38  
39 at least in English. We marked the 2007 WHO decision to update its guideline development and  
40  
41 using the Grading of Recommendations, Assessment, Development, and Evaluation (GRADE)  
42  
43 approach as a major change in methodology, representing a division of two eras (18). We limited  
44  
45 the focus of our analyses to the era following this change.  
46  
47  
48  
49  
50

51 We included guidelines with clearly articulated recommendations as defined by the Institute of  
52  
53 Medicine (IOM) Standards for Developing Trustworthy Clinical Practice Guidelines (14). After  
54  
55 contacting guideline developers, we excluded guidelines with unobtainable supplementary  
56  
57  
58  
59  
60

1  
2  
3 materials required for analysis (see supplement table 1S for our guideline and recommendation  
4 selection outlined in PICAR format).  
5  
6

7  
8 We searched Ovid MEDLINE and Embase from inception to June 7, 2019 (detailed search  
9 strategies in supplement). We conducted a second search in four guideline databases: TRIP  
10 (<https://www.tripdatabase.com>), G-I-N (<https://www.g-i-n.net/home>), BIGG  
11 (<http://sites.bvsalud.org/bigg/en/biblio/>), and the Canadian Medical Association clinical practice  
12 guideline (CPG) Infobase (<https://joulecma.ca/cpg/homepage>). We finally searched key  
13 international websites (supplement, table 2S) and reviewed references of included guidelines.  
14  
15

16  
17 Independently and in pairs, reviewers (RS, AB, AD, MV, GPM, SK, and TB) screened titles and  
18 abstracts and the full text of potentially eligible guidelines. Disagreements were resolved by  
19 discussion or with a third reviewer (NS, HJS).  
20  
21

## 22 23 24 25 26 27 28 29 30 31 DATA EXTRACTION AND QUALITY ASSESSMENT

32  
33 We extracted data from guidelines, retrievable supplementary materials, and guideline  
34 development documents facilitated by pilot-tested forms and distillerSR  
35 (<https://www.evidencepartners.com>). Extractors (RS, AB, AD, FS, GPM, MV, and SK) recorded  
36 data independently and in pairs, and resolved disagreements.  
37  
38

39  
40 Reviewers screened through recommendations classifying them as either considering AMR or  
41 not according to AMR dimensions (examples provided in table 1, and supplement table 3S).  
42  
43

44  
45 Although guidelines may have adopted different approaches to considering resistance with  
46 varying level of technicalities and detail, our operational definitions for considering a guideline  
47 “compliant” were inclusive. We assumed that for each recommendation, there would be an  
48 opportunity to consider information pertaining to AMR at the population- and outcome-level,  
49  
50  
51  
52  
53  
54  
55  
56  
57  
58  
59  
60

1  
2  
3 given that formulation of specific recommendations is guided by population, intervention,  
4  
5 comparison, and outcome (PICO) frameworks. Population-level considerations include  
6  
7 recommendations for populations with some level of resistance, considerations of local  
8  
9 resistance patterns, recommending the use of narrow-spectrum antimicrobials, and  
10  
11 recommending the watchful-waiting approach to prescribing. Outcome-level dimensions  
12  
13 included considering prospects of AMR or the emergence of resistance as a consequence of  
14  
15 antimicrobial use.  
16  
17  
18  
19  
20  
21  
22  
23  
24  
25  
26  
27  
28  
29  
30  
31  
32  
33  
34  
35  
36  
37  
38  
39  
40  
41  
42  
43  
44  
45  
46  
47  
48  
49  
50  
51  
52  
53  
54  
55  
56  
57  
58  
59  
60

Table 1: Satisfactory recommendations that consider antimicrobial resistance dimensions

| AMR dimension(s)                                          | Recommendation                                                                                                                                                                                                                                                                                                                                                                        | Evidence illustration                                                                                                                                                                                                                                                                                                                                                                                                                                                                                                     |
|-----------------------------------------------------------|---------------------------------------------------------------------------------------------------------------------------------------------------------------------------------------------------------------------------------------------------------------------------------------------------------------------------------------------------------------------------------------|---------------------------------------------------------------------------------------------------------------------------------------------------------------------------------------------------------------------------------------------------------------------------------------------------------------------------------------------------------------------------------------------------------------------------------------------------------------------------------------------------------------------------|
| <b>AMR population-level dimensions considered</b>         | Amoxicillin-clavulanate rather than amoxicillin alone is recommended as empiric antimicrobial therapy for ABRS in adults (weak, low) (13).                                                                                                                                                                                                                                            | Local national surveillance data in the United States of America for amoxicillin and beta-lactamase-producing <i>H. influenzae</i> was narratively described in the evidence summary was clearly linked to the recommendation.                                                                                                                                                                                                                                                                                            |
| <b>AMR outcome-level dimensions considered</b>            | <p>In neonates with gonococcal conjunctivitis, the WHO STI guideline suggests one of the following treatment options:</p> <ul style="list-style-type: none"> <li>• ceftriaxone 50 mg/kg (maximum 150 mg) IM as a single dose</li> <li>• kanamycin 25 mg/kg (maximum 75 mg) IM as a single dose</li> <li>• spectinomycin 25 mg/kg (maximum 75 mg) IM as a single dose (19).</li> </ul> | The outcome of ‘antimicrobial resistance’ was formally considered within a PICO framework within the guideline’s supplementary materials..                                                                                                                                                                                                                                                                                                                                                                                |
| <b>Population and outcome-level dimensions considered</b> | Bedaquiline should be included in longer MDR-TB regimens for patients aged 18 years or more (strong recommendation, moderate certainty in the estimates of effect) (20).                                                                                                                                                                                                              | The recommendation considers a multi-drug-resistant tuberculosis patients, and the outcome ‘acquisition (amplification) of drug resistance’ (21) was formally considered within a PICO framework provided within the guideline’s supplementary materials..                                                                                                                                                                                                                                                                |
|                                                           | Alternative first choice of antibiotics for adults aged 18 years and over with pharyngitis and a penicillin allergy or intolerance: Clarithromycin 250 mg to 500 mg twice a day for 5 days (22).                                                                                                                                                                                      | Summary of committee discussions show that population-level resistance data was considered: “based on evidence, clinical experience and resistance data, the committee agreed to recommend the following alternative first-choice antibiotics for use in penicillin allergy or for phenoxymethylpenicillin intolerance: clarithromycin or erythromycin (which is preferred in pregnancy)” (22). Additional formal outcome considerations include ‘antibiotic resistance’ within the guideline’s supplementary materials.. |

1  
2  
3 We considered a guideline satisfactory if it reports information on any of the above dimensions  
4 in either the recommendation, accompanying evidence summaries, or PICO framework. Whereas  
5  
6 guidelines that generally discussed AMR as an issue, without linking information pertaining to  
7  
8 AMR to each recommendation were considered unsatisfactory.  
9  
10

11  
12  
13 We assessed a guideline's quality using the Appraisal of Guidelines for Research and Evaluation  
14 (AGREE) II Instrument focusing on three relevant domains: a well-defined scope and purpose  
15 (domain one), rigorous development including a systematic search for evidence, transparent  
16 reporting of methods, links between evidence and recommendations, external review, and  
17  
18 procedures for update (domain three), and editorial independence (domain six) (23). We defined  
19  
20 acceptable quality as guidelines that scored 60% or greater in these three domains a priori based  
21  
22 on limited guidance on cut-off thresholds (3, 24). Focusing on these three domains and selecting  
23  
24 a relatively low score, allowed us to be inclusive.  
25  
26  
27  
28  
29  
30  
31

32  
33 We also abstracted information on values, resource use, equity, acceptability, and feasibility  
34 from guidelines that met our acceptability cut-off (i.e., 60%). Briefly, worldwide regions may  
35 differ in the accessibility of antimicrobials, the cultural view towards the use of antimicrobials,  
36 pharmaceutical costs, and health care structures. We selected these dimensions as the transparent  
37 reporting of these factors is essential: in appraising the evidence for antimicrobials, guideline  
38 developers should be aware of the breadth of implications of their recommendations when used  
39  
40 by decision-makers (7, 10, 25, 26). Guidelines that ignore this wider agenda could provide  
41  
42 narrow, misleading guidance.  
43  
44  
45  
46  
47  
48  
49  
50  
51  
52  
53  
54  
55  
56  
57  
58  
59  
60

## DATA SYNTHESIS AND STATISTICAL ANALYSIS

We conducted descriptive statistics at the guideline and recommendation level, using counts and proportions (95%CI). We calculated the mean (SD) for AGREE II scores by region. We also compared the quality of guidelines from the WHO versus regional guidelines using scaled domain scores, mean difference, and a two-sided t-test. We calculated the frequency of guideline reporting of values, resource use, equity, acceptability, and feasibility. All analyses were conducted in Microsoft® Excel and R-Studio (RStudio Team (2016). RStudio: Integrated Development for R. RStudio, Inc., Boston, MA URL <http://www.rstudio.com/>).

The study protocol was registered in PROSPERO (registration CRD42020145235). This paper is reported according to the Preferred Reporting Items for Systematic Review and Meta-analysis (PRISMA) guidelines and internally funded by the Michael G. DeGroot Cochrane Canada and McMaster GRADE centres.

## PATIENT AND PUBLIC INVOLVEMENT

One of the authors is a patient with a rare disease affected by repeated infections and treatment related issues of resistance to antimicrobials and was involved in aspects of the design and data abstraction. We specifically looked for information about patient values and preferences and included this in our review. However, we did not make any additional specific efforts to involve the patient and public in other aspects of this systematic review.

## Results

Our initial search identified 10,365 records. After screening, we retrieved 79 guidelines that had at least one recommendation on antimicrobial selection: (n = 28 TB, n = 13 gonorrhoea, n = 38 respiratory tract infections). Of these, 78 guidelines had sufficient information for assessment — one gonorrhoea guideline was excluded because we were unable to retrieve supplementary materials (Figure 1, and supplement table 4S) (27).

### GUIDELINE RECOMMENDATIONS CONSIDERING AMR

After classifying recommendations, we found that 74 guidelines had at least one recommendation that considered AMR and four guidelines without such considerations (table 2) (28-31). These were excluded from further assessment. Of the 74 guidelines, the majority were developed in North America (n = 29), (13, 27, 32-59) and Europe (n = 26) (22, 49, 60-82). A smaller portion were from Asia (n = 7), (83-89) South America (n = 1), (90) Africa (n = 1), (91) and Oceania (n = 1) (92). Nine guidelines were internationally developed by the WHO (19-21, 93-98).

*Table 2: Guidelines and recommendations with treatment recommendations with AMR\* considerations*

| Variable         | Guidelines (N=78**) | Total number of recommendations (N=1198) | Number of recommendations with AMR consideration (N=808) | Proportion of recommendations with AMR consideration (95% CI) |
|------------------|---------------------|------------------------------------------|----------------------------------------------------------|---------------------------------------------------------------|
| <b>Continent</b> |                     |                                          |                                                          |                                                               |
| International*** | 11                  | 93                                       | 72                                                       | 0.77 (0.67, 0.85)                                             |
| North America    | 29                  | 503                                      | 321                                                      | 0.64 (0.59, 0.68)                                             |
| South America    | 1                   | 26                                       | 7                                                        | 0.27 (0.12, 0.48)                                             |
| Europe           | 27                  | 429                                      | 334                                                      | 0.78 (0.74, 0.82)                                             |



|                         |    |     |    |                   |
|-------------------------|----|-----|----|-------------------|
| Africa                  | 1  | 24  | 8  | 0.33 (0.16, 0.55) |
| Asia                    | 8  | 119 | 65 | 0.55 (0.45, 0.64) |
| Oceania                 | 1  | 4   | 1  | 0.25 (0.01, 0.78) |
| <b>Publication year</b> |    |     |    |                   |
| 2007                    | 3  | 47  | 34 | 0.72 (0.57, 0.84) |
| 2008                    | 2  | 4   | 4  | 1.00 (0.40, 1.00) |
| 2009                    | 6  | 175 | 92 | 0.53 (0.45, 0.60) |
| 2010                    | 3  | 45  | 30 | 0.67 (0.51, 0.80) |
| 2011                    | 8  | 77  | 64 | 0.83 (0.72, 0.90) |
| 2012                    | 10 | 144 | 96 | 0.67 (0.58, 0.74) |
| 2013                    | 7  | 121 | 93 | 0.77 (0.68, 0.84) |
| 2014                    | 5  | 167 | 88 | 0.53 (0.45, 0.60) |
| 2015                    | 7  | 37  | 35 | 0.95 (0.80, 0.99) |
| 2016                    | 10 | 83  | 53 | 0.64 (0.53, 0.74) |
| 2017                    | 6  | 129 | 94 | 0.73 (0.64, 0.80) |
| 2018                    | 5  | 49  | 45 | 0.92 (0.80, 0.97) |
| 2019                    | 6  | 120 | 80 | 0.67 (0.57, 0.75) |

\*AMR = Antibiotic resistance. \*\* 4/78 guidelines did not have recommendations that considered resistance

\*\*\*International= World Health Organization

Within these 74 guidelines, we found that approximately two thirds of recommendations (n = 808/1198) considered AMR; that figure was 55.2% for TB recommendations (n = 272), 84.7% for gonorrhoea recommendations (n = 150), and 73.1% for respiratory tract infection recommendations (n = 386). The majority of recommendations were regionally developed (n = 736) (Figure 2).

Most recommendations considered either population-level or outcome-level AMR dimensions, while fewer considered both simultaneously. Approximately 17.6% of recommendations (n = 142/808) considered AMR at the population-level only while 34.7% (n = 281/808) of recommendations considered resistance as an outcome only. Most notably, a majority of those considering AMR as an outcome were not explicitly stated in PICO format, but rather buried within evidence summaries. Clearly stated outcomes formally considered in PICO frameworks included: 'acquired drug-resistance', 'antimicrobial in vitro resistance', 'bacterial antibiotic resistance', and 'emergence of drug-resistance'. Among respiratory tract infection

1  
2  
3 recommendations, 6·9% (n = 27/386) recommended no antimicrobial or back-up antimicrobial  
4  
5 (i.e. the watchful waiting approach), which is a population-level dimension, e.g.

6  
7 recommendations for patients who likely have infections that are viral in nature or self-limiting.  
8  
9

10  
11 Additionally, 47·6% (385/808) recommendations considered both population-level and outcome-  
12  
13 level AMR dimensions simultaneously. For example, fully immunized infant or school-aged  
14  
15 children with community-acquired pneumonia admitted to hospital are recommended to take  
16  
17 ampicillin or penicillin G given that local epidemiologic data lacks a substantial high-level of  
18  
19 penicillin-resistance for invasive *S. pneumoniae* (38). This recommendation is considering local  
20  
21 resistance patterns (population-level dimension). It is also followed by an evidence summary the  
22  
23 explains that lower costs of ampicillin or penicillin G need to be balanced by the increased  
24  
25 possibility of emergence of resistance (outcome-level dimension) that may occur from  
26  
27 prescribing broad-spectrum antimicrobials. About 22·5% (n = 182/808) of recommendations  
28  
29 considered local resistance patterns in a similar manner.  
30  
31  
32  
33  
34

### 35 CREDIBILITY OF INTERNATIONAL AND REGIONAL GUIDELINES WITH 36 RECOMMENDATIONS THAT CONSIDER AMR 37

38 Overall, only 39·2% (n = 29/74) of all international and regional guidelines had scores of 60% or  
39  
40 greater in scope and purpose, rigour of development, and editorial independence. Of the 29  
41  
42 guidelines that met our credibility cut-off, ten were developed in North America (13, 39-44, 47,  
43  
44 58, 99), nine in Europe (22, 49, 68, 71, 72, 76-79, 91), and two were developed in Asia (84, 86).  
45  
46  
47 When we compared international and regional guidelines, the majority of WHO guidelines  
48  
49 performed significantly better than regional guidelines (table 3 and supplement, figure 1S).  
50  
51

52 Guidelines that did not meet our credibility cut-off score and excluded from further assessment  
53  
54  
55  
56  
57  
58  
59  
60

included: nineteen from North America, seventeen from Europe, five from Asia, and three guidelines from South America, Africa, and Oceania.

Table 3: Performance of World Health Organization versus regional guidelines with AMR considerations

| AGREE II scores                         | World Health Organization guidelines (N=9) | Regional guidelines (N=65) | Mean difference (95%CI) | P     |
|-----------------------------------------|--------------------------------------------|----------------------------|-------------------------|-------|
| <b>Domain 1: Scope and purpose</b>      |                                            |                            |                         |       |
| Mean domain score % (SD)                | 89(13)                                     | 71(22)                     | -18 (-0.28, -0.06)      | 0.004 |
| Score range as %                        | 69–100                                     | 17–100                     |                         |       |
| Scored 60% or greater as % (n)          | 100 (n = 9)                                | 68 (n = 44)                |                         |       |
| <b>Domain 3: Rigor of development</b>   |                                            |                            |                         |       |
| Mean domain score % (SD)                | 81(24)                                     | 51(23)                     | -30 (-0.50, -0.11)      | 0.005 |
| Score range as %                        | 20–99                                      | 6–98                       |                         |       |
| Scored 60% or greater as % (n)          | 89 (n = 8)                                 | 37 (n = 24)                |                         |       |
| <b>Domain 6: Editorial independence</b> |                                            |                            |                         |       |
| Mean domain score % (SD)                | 88(20)                                     | 56(30)                     | -32 (-0.48, -0.15)      | 0.001 |
| Score range as %                        | 38–100                                     | 0–100                      |                         |       |
| Scored 60% or greater as % (n)          | 89 (n = 8)                                 | 49 (n = 32)                |                         |       |

SD: standard deviation

AMR: antimicrobial resistance

P: p-value

AGREE II: Appraisal for Guidelines Research and Evaluation II

#### GUIDELINES CONSIDERING VALUES, RESOURCE USE, ACCEPTABILITY, FEASIBILITY, AND EQUITY

Only five (19, 20, 94, 95, 97) of the 29 guidelines reported all factors required for contextualization: values, resource use, equity, acceptability, and feasibility (supplement table 5S). The WHO was the only guideline developer to report on all five criteria in four TB guidelines and one gonorrhoea guideline.

1  
2  
3 Across all 29 guidelines, resource use was the most frequently considered (n = 23 guidelines),  
4 followed by values (n = 16 guidelines), acceptability (n = 12 guidelines), and feasibility (n = 12  
5 guidelines). Equity was the least considered factor with only seven guidelines that made such  
6 considerations (Figure 3): two were regionally and five were internationally developed. The  
7 WHO, the National Institute for Health and Care Excellence (NICE), and the United States  
8 Preventative Task Force (USPSTF) were the only organizations to consider equity.  
9

10  
11  
12  
13  
14  
15  
16  
17  
18 Regional guidelines tended to consider values, resource use, equity, acceptability, and feasibility  
19 less than internationally developed guidelines (supplement, figure 2S). Most regional guidelines  
20 considered one (n = 6/21) or two (n = 6/21) or three (n = 4/21) or none (n = 4/21) of the above  
21 contextual factors. Values and resource use were considered the most, while equity,  
22 acceptability, and feasibility were less considered in regionally developed guidelines (Figure 4).  
23  
24  
25  
26  
27  
28  
29

## 30 **Discussion**

### 31 32 33 34 SUMMARY OF FINDINGS

35  
36  
37 Over a 13-year period, relatively few guidelines on antibiotics for highly prevalent infectious  
38 diseases included AMR considerations. Approximately 60% of regionally developed guidelines  
39 were of low quality and reported less factors required for tailoring recommendations to specific  
40 contexts. International WHO guidelines had substantially higher quality scores than regional  
41 guidelines. International guidelines also consistently considered important information required  
42 for developing recommendations that are appropriate for specific contexts compared to regional  
43 guidelines.  
44  
45  
46  
47  
48  
49  
50  
51  
52  
53  
54  
55  
56  
57  
58  
59  
60

1  
2  
3 There is an emerging consensus that reporting of Evidence to Decision dimensions is ethically  
4 and scientifically essential. Unfortunately, reporting these dimensions is not always seen in  
5  
6 practice. Our review highlighted that some of the proposed dimensions seemed to be adopted by  
7  
8 guideline developers (i.e., values and resource use were most considered), while others were less  
9  
10 so (i.e., acceptability, feasibility, and equity were the least considered). Further, the quality of  
11  
12 these guidelines varied and there were inconsistencies between regions and guidelines  
13  
14 promoted/sponsored by different entities.  
15  
16  
17  
18  
19

20 The use of the GRADE Evidence to Decision framework by the WHO and NICE seems to  
21  
22 positively influence the consideration of contextual factors in the guidelines we reviewed. A high  
23  
24 proportion of WHO (n=5/7) and NICE (n=1/5) guidelines contained complete information  
25  
26 necessary to provide optimal guidance on how to use antimicrobials in the considered  
27  
28 syndromes. Other regional organizations provided limited information addressing contextual  
29  
30 factors – most addressed one (n=6/21) or two (n=6/21) contextual factors and a good proportion  
31  
32 did not address any (4/21).  
33  
34  
35  
36

### 37 STRENGTHS AND LIMITATIONS

38  
39  
40 Our work has strengths. To our knowledge, this is the first study to assess the extent to which  
41  
42 guidelines are considering local dimensions such as AMR, and to use established frameworks:  
43  
44 AGREE II, and GRADE Evidence to Decision. We also employed systematic methods to  
45  
46 conduct our review and validated tools to measure the quality of guidelines (23, 100).  
47  
48  
49

50  
51 There are several limitations to our study. The use of a credibility score of 60% or greater for  
52  
53 three of the six AGREE II domains is based on limited guidance on cut-off thresholds. However,  
54  
55 by focusing on three domains and a low cut-off we were inclusive although we also focused on  
56  
57  
58  
59

1  
2  
3 English language publications only (3, 101). We used general criteria from the GRADE  
4  
5 Evidence to Decision Frameworks that are applicable to various interventions, and not specific to  
6  
7 antimicrobials. These general dimensions could be complemented with specific criteria related to  
8  
9 the antimicrobial field such as providing guidance on the appropriate threshold for escalating  
10  
11 empiric antimicrobials from narrower spectrum agents to broader spectrum agents. In other  
12  
13 words, the real test for antimicrobial guidelines may be whether they enable prescribers and the  
14  
15 public to fully consider the potential implications of antimicrobial prescribing on resistance. This  
16  
17 would lead to virtuous and parsimonious prescribing and consumption habits.  
18  
19  
20  
21

## 22 CONTEXT TO OTHER RESEARCH

23  
24  
25 We previously found that about two thirds of respiratory tract infection recommendations on  
26  
27 empirical antimicrobial use did not consider country-specific resistance patterns. The use of a  
28  
29 broader framework and additional focus areas may have resulted in the larger number of  
30  
31 recommendations that considered AMR uncovered by this study. Both studies support that there  
32  
33 are inconsistencies in considering AMR in recommendation development and potential  
34  
35 duplication of work among infectious disease guidelines.  
36  
37  
38  
39

## 40 IMPLICATIONS FOR PRACTICE

41  
42  
43 There are several implications for guideline developers. Given the suboptimal quality of  
44  
45 guidelines in our sample, guideline methodology should improve particularly when  
46  
47 recommendations move from global to regional levels. This includes improving the processes  
48  
49 used in evidence syntheses and recommendation formulation, transparency, and addressing  
50  
51 potential undue biases with competing interests. As far as regional guidelines need to  
52  
53 incorporate contextual information when developing their recommendations, global guidelines  
54  
55  
56  
57  
58  
59  
60

1  
2  
3 need to provide information about how to contextualize recommendations for appropriate AMR  
4  
5 considerations.  
6

7  
8  
9 Guideline development can be done more efficiently and economically by using work done by  
10  
11 other developers including the WHO. Rather developing guidelines from scratch, time and  
12  
13 resources (102) may be shifted towards refining AMR surveillance systems that provide national  
14  
15 resistance data to support recommendations and appropriate antimicrobial use. Further, country-  
16  
17 level participation of the Global Antimicrobial Resistance Surveillance System (GLASS)  
18  
19 supports global monitoring of resistance trends, emerging resistance, and the ability to evaluate  
20  
21 the effectiveness of interventions (103). As of 2020, 94 countries are participating in GLASS  
22  
23 (103). However, some countries lack public health infrastructure, national laboratory capacities,  
24  
25 and data management which is essential for surveillance systems (6, 104). In 2018, there was at  
26  
27 least one country within each WHO regions with the ability to collect national resistance data  
28  
29 (104). Regions facing unique challenges to antimicrobial stewardship capacities, may look to  
30  
31 recommendations developed by other regions with similar resistance experiences. Finally, as  
32  
33 new antimicrobial therapies become available, and the scientific community cumulates more  
34  
35 evidence on resistance patterns and their implications for local prescribing, future infectious  
36  
37 disease guidelines may require more frequent updating.  
38  
39  
40  
41  
42  
43

#### 44 IMPLICATIONS FOR RESEARCH

45  
46  
47 Although we focused on recommendations on antimicrobial selection and prescribing, there are  
48  
49 many other approaches that could be assessed in future research (e.g. rapid diagnostics to rule-  
50  
51 out viral infections and resistant strains). In addition, research should also explore whether  
52  
53 recommendations are appropriately guided by evidence, resistance data, and the WHO's  
54  
55  
56  
57  
58  
59  
60

1  
2  
3 Essential Medicines List and AWaRe Classification Database of Antimicrobials updates (105).

4  
5 With regards to contextualization of infectious disease recommendations, we have developed  
6  
7 transparent recommendation maps that facilitate use of recommendations across jurisdictions for  
8  
9 TB (<https://who.tuberculosis.recmmap.org>) and COVID-19 (<https://covid19.recmmap.org>) where  
10  
11 we apply some of our findings.  
12  
13  
14

### 15 16 **Conclusion (word count: 69)**

17  
18  
19 Our study offers information on how current infectious disease guidelines are considering  
20  
21 contextual factors necessary to appropriately prescribe antimicrobials. We also present  
22  
23 dimensions that can be considered by a formal AMR framework used in combination with  
24  
25 GRADE Evidence to Decision Frameworks to facilitate amelioration of the cornerstones that are  
26  
27 guiding current antimicrobial use. Improving the quality of guidelines targeting specific regional  
28  
29 areas is required. This may help protect the remaining and essential medicines we have left, and  
30  
31 the future of new classes of antimicrobials (106).  
32  
33  
34  
35

### 36 37 **Contributors**

38  
39 RS, HJS, NS, ML, and TP designed the study protocol. RS coordinated the study. RS, AB, AD,  
40  
41 GPM, MV, SK, and TB assessed eligibility of records at title and abstract. RS, AD, and MV  
42  
43 searched for unpublished guidelines in key websites. RS, AB, AD, GPM, MV, and SK assessed  
44  
45 eligibility of full text articles. RS, AB, AD, FS, GPM, MV, and SK extracted data and performed  
46  
47 quality assessment using the AGREE II tool. NS and HJS settled disputes. RS analyzed and  
48  
49 interpreted the data with HJS, NS, and ML. RS and HJS drafted the manuscript, with writing  
50  
51 contributions from NS, ML, and LM. All authors interpreted and make edits to the manuscript.  
52  
53  
54  
55  
56  
57  
58  
59



## Acknowledgments

This work was supported by the Michael G. DeGroot Canada and McMaster GRADE centres.

We would like to thank biostatistician Dr. Thuva Vanniyasingam for assisting with developing an analysis plan for our protocol.

## Competing interests

We declare no competing interests. Drs. Loeb and Schünemann report personal fees or research support from the World Health Organization, outside of this research.

## Funding

Michael G. DeGroot Cochrane Canada and McMaster GRADE centres.

## Ethics approval statement

Not applicable.

## Data sharing

No additional data available.

## References

1. United Nations meeting on antimicrobial resistance. Bull World Health Organ. 2016;94(9):638-9.
2. Organization WH. Global Action Plan on Antimicrobial Resistance. Geneva; 2015. Report No.: ISBN 978 92 4 150976 3.
3. Johnston A, Kelly SE, Hsieh S-C, Skidmore B, Wells GA. Systematic reviews of clinical practice guidelines: a methodological guide. Journal of Clinical Epidemiology. 2019;108:64-76.
4. Canada PHAo. Tackling Antimicrobial Resistance and Antimicrobial Use: A Pan-Canadian Framework for Action. Canada; 2017. Report No.: ISBN: 978-0-660-08168-7.
5. Anderson M, Schulze K, Cassini A, Plachouras D, Mossialos E. A governance framework for development and assessment of national action plans on antimicrobial resistance.

- 1  
2  
3 Lancet Infect Dis. 2019;19(11):e371-e84. doi: 10.1016/S473-3099(19)30415-3. Epub 2019 Oct  
4 3.
- 5 6. Elias C, Moja L, Mertz D, Loeb M, Forte G, Magrini N. Guideline recommendations and  
6 antimicrobial resistance: the need for a change. *BMJ Open*. 2017;7(7):e016264. doi:  
7 10.1136/bmjopen-2017-.
- 8 7. Schünemann HJ, Wiercioch W, Brozek J, Etzeandía-Ikobaltzeta I, Mustafa RA, Manja V,  
9 et al. GRADE Evidence to Decision (EtD) frameworks for adoption, adaptation, and de novo  
10 development of trustworthy recommendations: GRADE-ADOLPMENT. *J Clin Epidemiol*.  
11 2017;81:101-110.(doi):10.1016/j.jclinepi.2016.09.009. Epub Oct 3.
- 12 8. Andrews J, Guyatt G, Oxman AD, Alderson P, Dahm P, Falck-Ytter Y, et al. GRADE  
13 guidelines: 14. Going from evidence to recommendations: the significance and presentation of  
14 recommendations. *J Clin Epidemiol*. 2013;66(7):719-25. doi: 10.1016/j.jclinepi.2012.03.013.  
15 Epub 3 Jan 9.
- 16 9. Rzewuska M, Duncan EM, Francis JJ, Morris AM, Suh KN, Davey PG, et al. Barriers  
17 and Facilitators to Implementation of Antibiotic Stewardship Programmes in Hospitals in  
18 Developed Countries: Insights From Transnational Studies. *Frontiers in Sociology*. 2020;5(41).
- 19 10. Scott IA, Guyatt GH. Clinical practice guidelines: the need for greater transparency in  
20 formulating recommendations. *Med J Aust*. 2011;195(1):29-33.
- 21 11. O'Neill J. Tackling Drug-Resistant Infections Globally: Final Report and  
22 Recommendations. London; 2016.
- 23 12. CDC. Antibiotic Resistance Threats in the United States, 2019. Atlanta, GA; 2019.
- 24 13. Chow AWB, M. S.; Brook, I.; Brozek, J. L.; Goldstein, E. J. C.; Hicks, L. A.; Pankey, G.  
25 A.; Seleznick, M.; Volturo, G.; Wald, E. R.; File, T. M. IDSA clinical practice guideline for  
26 acute bacterial rhinosinusitis in children and adults. *Clinical Infectious Diseases*. 2012;54(8):e72-  
27 e112.
- 28 14. Guidelines IoMUCoSfDTCP. Clinical Practice Guidelines We Can Trust. Washington  
29 (DC): National Academies Press (US); 2011. Available from:  
30 <https://www.ncbi.nlm.nih.gov/books/NBK209539/?report=classic>.
- 31 15. Knowles R, Sharland M, Hsia Y, Magrini N, Moja L, Siyam A, et al. Measuring  
32 antibiotic availability and use in 20 low- and middle-income countries. *Bull World Health*  
33 *Organ*. 2020;98(3):177-87C.
- 34 16. Knowles R, Sharland M, Hsia Y, Magrini N, Moja L, Siyam A, et al. Measuring  
35 antibiotic availability and use in 20 low- and middle-income countries. *Bull World Health*  
36 *Organ*. 2020;98(3):177-87C.
- 37 17. Sharland M, Gandra S, Huttner B, Moja L, Pulcini C, Zeng M, et al. Encouraging  
38 AWaRe-ness and discouraging inappropriate antibiotic use-the new 2019 Essential Medicines  
39 List becomes a global antibiotic stewardship tool. *Lancet Infect Dis*. 2019;19(12):1278-80. doi:  
40 10.1016/S473-3099(19)30532-8.
- 41 18. Schünemann HJ, Hill SR, Kakad M, Vist GE, Bellamy R, Stockman L, et al. Transparent  
42 development of the WHO rapid advice guidelines. *PLoS Med*. 2007;4(5):e119-e.
- 43 19. WHO guidelines for the treatment of Neisseria gonorrhoeae. World Health Organisation  
44 Guidelines. 2016.
- 45 20. Anonymous. WHO consolidated guidelines on drug-resistant tuberculosis treatment  
46 World Health Organization. 2019.

21. Improving the diagnosis and treatment of smear-negative pulmonary and extrapulmonary tuberculosis among adults and adolescents. Recommendations for HIV-prevalent and resource-constrained settings. World Health Organization. 2007.
22. AHRQ - Agency for Healthcare Research + Quality. Surgical management of otitis media with effusion in children. National Collaborating Centre for Women's and Children's Health. NGC:007182 [Guideline Clearing Report]. 2008 [Available from: [http://guidelines.gov/summary/summary.aspx?doc\\_id=14314&nbr=7182](http://guidelines.gov/summary/summary.aspx?doc_id=14314&nbr=7182)].
23. Brouwers MC, Kerkvliet K, Spithoff K. The AGREE Reporting Checklist: a tool to improve reporting of clinical practice guidelines. *BMJ*. 2016;352:i1152.
24. Brouwers MC, Spithoff K, Lavis J, Kho ME, Makarski J, Florez ID. What to do with all the AGREEs? The AGREE portfolio of tools to support the guideline enterprise. *Journal of Clinical Epidemiology*. 2020;125:191-7.
25. Moberg J, Oxman AD, Rosenbaum S, Schünemann HJ, Guyatt G, Flottorp S, et al. The GRADE Evidence to Decision (EtD) framework for health system and public health decisions. *Health Research Policy and Systems*. 2018;16(1):45.
26. Alonso-Coello P, Schünemann HJ, Moberg J, Brignardello-Petersen R, Akl EA, Davoli M, et al. GRADE Evidence to Decision (EtD) frameworks: a systematic and transparent approach to making well informed healthcare choices. 1: Introduction. *BMJ*. 2016;353:i2016.
27. Ontario PH. Ontario Gonorrhoea Testing and Treatment Guide, 2nd Edition. 2018.
28. Organization WH. THE USE OF ANTIRETROVIRAL DRUGS FOR TREATING AND PREVENTING HIV INFECTION. 2016.
29. Kawaguchi RM, K.; Akira, S.; Ishitani, K.; Iwasaku, K.; Ueda, Y.; Okagaki, R.; Okano, H.; Oki, T.; Koga, K.; Kido, M.; Kurabayashi, T.; Kurabayashi, Y.; Sato, Y.; Shiina, K.; Takai, Y.; Tanimura, S.; Chaki, O.; Terauchi, M.; Todo, Y.; Noguchi, Y.; Nose-Ogura, S.; Baba, T.; Hirasawa, A.; Fujii, T.; Maruyama, T.; Miyagi, E.; Yanagida, K.; Yoshino, O.; Iwashita, M.; Maeda, T.; Minegishi, T.; Kobayashi, H. Guidelines for office gynecology in Japan: Japan Society of Obstetrics and Gynecology (JSOG) and Japan Association of Obstetricians and Gynecologists (JAOG) 2017 edition. *Journal of Obstetrics and Gynaecology Research*. 2019;45(4):766-86.
30. Anonymous. Recommendations for investigating contacts of persons with infectious tuberculosis in low- and middle-income countries. World Health Organization. 2012.
31. Di Comite AE, S.; Villani, A.; Stronati, M.; Italian Pediatric, T. B. Study Group. How to manage neonatal tuberculosis. *J Perinatol*. 2016;36(2):80-5.
32. Prevention CfDca. Provisional CDC guidelines for the use and safety monitoring of bedaquiline fumarate (Sirturo) for the treatment of multidrug-resistant tuberculosis. Article. Atlanta; 2013 Oct 2013. Contract No.: 9.
33. Wald ERA, K. E.; Bordley, C.; Darrow, D. H.; Glode, M. P.; Marcy, S. M.; Nelson, C. E.; Rosenfeld, R. M.; Shaikh, N.; Smith, M. J.; Williams, P. V.; Weinberg, S. T. Clinical practice guideline for the diagnosis and management of acute bacterial sinusitis in children aged 1 to 18 years. *Pediatrics*. 2013;132(1):e262-e80.
34. Workowski KAB, G. A. Sexually transmitted diseases treatment guidelines, 2015. Article. Atlanta, Georgia; 2015 Jun 2015.
35. Desrosiers ME, G. A.; Keith, P. K.; Wright, E. D.; Kaplan, A.; Bouchard, J.; Ciavarella, A.; Doyle, P. W.; Javer, A. R.; Leith, E. S.; Mukherji, A.; Schellenberg, R. R.; Small, P.; Witterick, I. J. Canadian clinical practice guidelines for acute and chronic rhinosinusitis. *Allergy, Asthma and Clinical Immunology*. 2011;7(1).

- 1
- 2
- 3
- 4 36. Mayor MTR, M. A.; Uduhiri, K. A. Diagnosis and management of gonococcal infections. *Am Fam Physician*. 2012;86(10):931-8.
- 5
- 6 37. Kaplan JEB, C.; Holmes, K. H.; Brooks, J. T.; Pau, A.; Masur, H. Guidelines for
- 7 prevention and treatment of opportunistic infections in HIV-infected adults and adolescents:
- 8 recommendations from CDC, the National Institutes of Health, and the HIV Medicine
- 9 Association of the Infectious Diseases Society of America. *MMWR*. 2009;Recommendations
- 10 and reports:Morbidity and mortality weekly report. Recommendations and reports / Centers for
- 11 Disease Control. 58 (RR-4) (pp 1-207; quiz CE1-2074).
- 12
- 13 38. The Management of Community-Acquired Pneumonia in Infants and Children Older
- 14 Than 3 Months of Age. Infectious Diseases Society of America. 2011.
- 15 39. Diagnosis and Management of Acute Otitis Media. American Academy of Family
- 16 Physicians. 2013.
- 17 40. Adult Sinusitis. American Academy of Otolaryngology - Head and Neck Surgery. 2015.
- 18 41. Otitis Media with Effusion (OME). American Academy of Otolaryngology - Head and
- 19 Neck Surgery. 2016.
- 20 42. Treatment of Drug-Susceptible Tuberculosis: Official ATS/CDC/IDSA Clinical Practice
- 21 Guidelines. American Thoracic Society. 2016.
- 22 43. Respiratory Illness in Children and Adults, Diagnosis and Treatment of. Institute for
- 23 Clinical Systems Improvement. 2017.
- 24 44. IDSA - Infectious Diseases Society of America. Clinical Practice Guideline for the
- 25 Diagnosis and Management of Group A Streptococcal Pharyngitis: 2012 Update by the
- 26 Infectious Diseases Society of America [Guideline]. 2012 [Available from:
- 27 <http://cid.oxfordjournals.org/content/early/2012/09/06/cid.cis629.full>.
- 28
- 29 45. Borisov ASBM, S.; Njie, G. J.; Winston, C. A.; Burton, D.; Goldberg, S.; Yelk
- 30 Woodruff, R.; Allen, L.; LoBue, P.; Vernon, A. Update of Recommendations for Use of Once-
- 31 Weekly Isoniazid-Rifapentine Regimen to Treat Latent Mycobacterium tuberculosis Infection.
- 32 *MMWR Morbidity and mortality weekly report*. 2018;67(25):723-6.
- 33 46. Pogany LR, B.; Robinson, J.; Gale-Rowe, M.; Latham-Carmanico, C.; Weir, C.; Wong,
- 34 T. Management of gonococcal infection among adults and youth: New key recommendations.
- 35 *Canadian Family Physician*. 2015;61(10):869-73.
- 36 47. Richard M. Rosenfeld M, MPH1, Jay F. Piccirillo, MD2,, Sujana S. Chandrasekhar M,
- 37 Itzhak Brook, MD, MSc4, Kaparaboyana Ashok Kumar, MD, FRCS5, Maggie Kramper, RN,
- 38 FNP6, Richard R. Orlandi, MD7, James N. Palmer, MD8, Zara M. Patel, MD9, Anju Peters,
- 39 MD10, Sandra A. Walsh11, and Maureen D. Corrigan. Clinical Practice Guideline (Update):
- 40 Adult Sinusitis. 2015.
- 41 48. Report MaMW. Guidelines for the Prevention and Treatment of Opportunistic Infections
- 42 Among HIV-Exposed and HIV-Infected Children. 2009.
- 43 49. Canada PHAo. Canadian Tuberculosis Standards, 7th Edition. 2014.
- 44 50. Control BCfD. Sexually Transmitted Infections in Adolescents and Adults 2014.
- 45 51. Prevention CfDca. Guidelines for the Prevention and Treatment of Opportunistic
- 46 Infections in Adults and Adolescents with HIV. 2019.
- 47 52. America IDSo. Clinical Practice Guidelines by the Infectious Diseases Society of
- 48 America for the Treatment of Methicillin- Resistant Staphylococcus aureus Infections in Adults
- 49 and Children. 2011.
- 50 53. Infections CGoST. Gonococcal Infections Chapter. 2013.
- 51
- 52
- 53
- 54
- 55
- 56
- 57
- 58
- 59
- 60

- 1
- 2
- 3
- 4 54. Prevention CfDCA. Guidelines for the Prevention and Treatment of Opportunistic
- 5 Infections in HIV-Exposed and HIV-Infected Children. 2013.
- 6 55. Pharyngitis. University of Michigan Health System. 2013.
- 7 56. HIV/AIDS BCCfEi. Therapeutic guidelines for antiretroviral (ARV) treatment in adult
- 8 HIV infection. 2015.
- 9 57. Mandell LAW, R. G.; Anzueto, A.; Bartlett, J. G.; Campbell, G. D.; Dean, N. C.; Dowell,
- 10 S. F.; File Jr, T. M.; Musher, D. M.; Niederman, M. S.; Torres, A.; Whitney, C. G. Infectious
- 11 Diseases Society of America/American Thoracic Society Consensus Guidelines on the
- 12 management of community-acquired pneumonia in adults. *Clinical Infectious Diseases*.
- 13 2007;44(SUPPL. 2):S27-S72.
- 14 58. Ocular Prophylaxis for Gonococcal Ophthalmia Neonatorum: Preventive Medication. US
- 15 Preventive Services Task Force. 2019.
- 16 59. Jereb JAG, S. V.; Powell, K.; Villarino, M. E.; Lobue, P. Recommendations for use of an
- 17 isoniazid-rifapentine regimen with direct observation to treat latent mycobacterium tuberculosis
- 18 infection. *Morbidity and Mortality Weekly Report*. 1650;60(48):1650-3.
- 19 60. Bignell CU, M. 2012 European guideline on the diagnosis and treatment of gonorrhoea in
- 20 adults. *International Journal of STD and AIDS*. 2013;24(2):85-92.
- 21 61. Bignell CF, M. UK national guideline for the management of gonorrhoea in adults, 2011.
- 22 *International Journal of STD and AIDS*. 2011;22(10):541-7.
- 23 62. Harris MC, J.; Coote, N.; Fletcher, P.; Harnden, A.; McKean, M.; Thomson, A. British
- 24 Thoracic Society guidelines for the management of community acquired pneumonia in children:
- 25 Update 2011. *Thorax*. 2011;66(SUPPL. 2).
- 26 63. Migliori GBZ, J. P.; Abubakar, I.; Ibraim, E.; Caminero, J. A.; De Vries, G.; D'Ambrosio,
- 27 L.; Centis, R.; Sotgiu, G.; Menegale, O.; Kliiman, K.; Aksamit, T.; Cirillo, D. M.; Danilovits,
- 28 M.; Dara, M.; Dheda, K.; Dinh-Xuan, A. T.; Kluge, H.; Lange, C.; Leimane, V.; Loddenkemper,
- 29 R.; Nicod, L. P.; Raviglione, M. C.; Spanevello, A.; Thomsen, V. O.; Villar, M.; Wanlin, M.;
- 30 Wedzicha, J. A.; Zumla, A.; Blasi, F.; Huitric, E.; Sandgren, A.; Manissero, D. European Union
- 31 Standards for Tuberculosis Care. *European Respiratory Journal*. 2012;39(4):807-19.
- 32 64. Woodhead MB, F.; Ewig, S.; Garau, J.; Huchon, G.; Ieven, M.; Ortqvist, A.; Schaberg,
- 33 T.; Torres, A.; Van Der Heijden, G.; Read, R.; Verheij, T. J. M. Guidelines for the management
- 34 of adult lower respiratory tract infections - Full version. *Clinical Microbiology and Infection*.
- 35 2011;17(SUPPL. 6):E1-E59.
- 36 65. Spindler CS, K.; Eriksson, L.; Hjerdt-Goscinski, G.; Holmberg, H.; Lidman, C.; Nilsson,
- 37 A.; Ortqvist, A.; Hedlund, J. Swedish guidelines on the management of community-acquired
- 38 pneumonia in immunocompetent adults - Swedish Society of Infectious Diseases 2012.
- 39 *Scandinavian Journal of Infectious Diseases*. 2012;44(12):885-902.
- 40 66. Thwaites GF, M.; Hemingway, C.; Scott, G.; Solomon, T.; Innes, J.; British Infection,
- 41 Society. British Infection Society guidelines for the diagnosis and treatment of tuberculosis of
- 42 the central nervous system in adults and children. *J Infect*. 2009;59(3):167-87.
- 43 67. Bignell CIW. 2009 European (IUSTI/WHO) guideline on the diagnosis and treatment of
- 44 gonorrhoea in adults. *Int J STD AIDS*. 2009;20(7):453-7.
- 45 68. Internal Clinical Guidelines T. Tuberculosis Prevention, diagnosis, management and
- 46 service organization. National Institute for Health and Care Excellence (UK). 2016;01:01.
- 47 69. Menendez RT, A.; Aspa, J.; Capelastegui, A.; Prat, C.; Rodriguez de Castro, F.
- 48 Community acquired pneumonia. New guidelines of the Spanish society of chest diseases and
- 49 thoracic surgery (SEPAR). *Archivos de Bronconeumologia*. 2010;46(10):543-58.
- 50
- 51
- 52
- 53
- 54
- 55
- 56
- 57
- 58
- 59

- 1
- 2
- 3
- 4 70. Respiratory tract infections (self-limiting): prescribing antibiotics. National Institute for
- 5 Health and Clinical Excellence - Clinical Guidelines. 2008.
- 6 71. Guidelines for the management of community-acquired pneumonia in adults. British
- 7 Infection Association. 2009.
- 8 72. CPG on the Diagnosis, Treatment and Prevention of Tuberculosis. GuiaSalud. 2010.
- 9 73. Sinusitis (acute): antimicrobial prescribing. National Institute for Health and Clinical
- 10 Excellence - Clinical Guidelines. 2017.
- 11 74. British Association for Sexual Health and HIV national guideline for the management of
- 12 infection with *Neisseria gonorrhoeae*. British Association for Sexual Health and HIV. 2019.
- 13 75. Stahl JPA, P.; Bruneel, F.; De Broucker, T.; Duval, X.; Fantin, B.; Girard, N.; Herrmann,
- 14 J. L.; Honnorat, J.; Lecuit, M.; Mailles, A.; Martinez-Almoyna, L.; Morand, P.; Piroth, L.;
- 15 Tattevin, P. Guidelines on the management of infectious encephalitis in adults. *Medecine et*
- 16 *Maladies Infectieuses*. 2017;47(3):179-94.
- 17 76. Heidemann CL, J; Berg, J; Christensen, JJ; Håkonsen, SJ; Jakobsen, M; Johansen, CJ;
- 18 Nielsen, LH; Hansen, MP; Poulsen, A; Schousboe, LP; Skrubbeltrang, C; Vind, AB; Homøe, P.
- 19 Danish guidelines on management of otitis media in preschool children. 2016.
- 20 77. Management of sore throat and indications for tonsillectomy. SIGN. 2010.
- 21 78. Excellence ENIfHaC. Sore throat (acute): antimicrobial prescribing. 2018.
- 22 79. Excellence NIfHaC. Pneumonia (community-acquired): antimicrobial prescribing. 2019.
- 23 80. Wiersinga WJB, M. J.; Boersma, W. G.; Jonkers, R. E.; Aleva, R. M.; Kullberg, B. J.;
- 24 Schouten, J. A.; Degener, J. E.; van de Garde, E. M. W.; Verheij, T. J.; Sachs, A. P. E.; Prins, J.
- 25 M. Management of community-acquired pneumonia in adults: 2016 guideline update from the
- 26 dutch working party on antibiotic policy (SWAB) and dutch association of chest physicians
- 27 (NVALT). *Netherlands Journal of Medicine*. 2018;76(1):4-13.
- 28 81. Athlin SL, C.; Lundqvist, A.; Naucner, P.; Nilsson, A. C.; Spindler, C.; Stralin, K.;
- 29 Hedlund, J. Management of community-acquired pneumonia in immunocompetent adults:
- 30 updated Swedish guidelines 2017. *Infectious Diseases*. 2018;50(4):247-72.
- 31 82. Chiappini EM, R.; Bruzzese, E.; Capuano, A.; Colombo, M.; Cricelli, C.; Di Mauro, G.;
- 32 Esposito, S.; Festini, F.; Guarino, A.; Miniello, V. L.; Principi, N.; Marchisio, P.; Rafaniello, C.;
- 33 Rossi, F.; Sportiello, L.; Tancredi, F.; Venturini, E.; Galli, L.; de Martino, M. Rational use of
- 34 antibiotics for the management of children's respiratory tract infections in the ambulatory setting:
- 35 An evidence-based consensus by the Italian Society of Preventive and Social Pediatrics.
- 36 *Paediatric Respiratory Reviews*. 2014;15(3):231-6.
- 37 83. Gupta DA, R.; Aggarwal, A.; Singh, N.; Mishra, N.; Khilnani, G.; Samaria, J.; Gaur, S.;
- 38 Jindal, S. Guidelines for diagnosis and management of community-and hospital-acquired
- 39 pneumonia in adults: Joint ICS/NCCP(I) recommendations. *Lung India*. 2012;29(SUPPL.2):S27-
- 40 S62.
- 41 84. Abdul Rahaman JAK, H. B.; Yusof, M.; Hanafi, N. S.; Wong, J. L. Tuberculosis in
- 42 adults. *Malays Fam Physician*. 2014;9(3):34-7.
- 43 85. Ministry of Public Health/Qatar. Community acquired pneumonia [Guideline]. 2016
- 44 [updated 19.03.2017. Available from: [https://www.moph.gov.qa/health-](https://www.moph.gov.qa/health-strategies/Documents/Guidelines/MOPH%20Guideline%20-%20Community%20acquired%20pneumonia%20v2-1%20FINAL.pdf)
- 45 [strategies/Documents/Guidelines/MOPH%20Guideline%20-](https://www.moph.gov.qa/health-strategies/Documents/Guidelines/MOPH%20Guideline%20-%20Community%20acquired%20pneumonia%20v2-1%20FINAL.pdf)
- 46 [%20Community%20acquired%20pneumonia%20v2-1%20FINAL.pdf](https://www.moph.gov.qa/health-strategies/Documents/Guidelines/MOPH%20Guideline%20-%20Community%20acquired%20pneumonia%20v2-1%20FINAL.pdf).
- 47 86. HTA DoH - HTA Unit, Ministry of Health, Malaysia, Management of Otitis Media with
- 48 Effusion in Children [Guideline]. 2012 [Available from:
- 49 <http://www.moh.gov.my/attachments/7779.pdf>.
- 50
- 51
- 52
- 53
- 54
- 55
- 56
- 57
- 58
- 59
- 60

- 1  
2  
3 87. Lee MSO, J. Y.; Kang, C. I.; Kim, E. S.; Park, S.; Rhee, C. K.; Jung, J. Y.; Jo, K. W.;  
4 Heo, E. Y.; Park, D. A.; Suh, G. Y.; Kiem, S. Guideline for antibiotic use in adults with  
5 community-acquired pneumonia. *Infection and Chemotherapy*. 2018;50(2):160-98.
- 6 88. Singapore MoH. Prevention, Diagnosis and Management of Tuberculosis. 2016.
- 7 89. WORKING ZAM-YMA-QAA-AMS-MSNATGC. Management and Prevention  
8 Strategies for Community-Acquired Pneumonia in the Gulf Corporation Council. *Journal of*  
9 *Chemotherapy*. 2007.
- 10 90. Ricardo de Amorim Corrêa FLCL, Jorge Luiz Pereira-Silva, Rodney Luiz Frare e Silva,  
11 Alexandre Pinto Cardoso, Antônio Carlos Moreira Lemos, Flávia Rossi, Gustavo Michel, Liany  
12 Ribeiro, Manuela Araújo de Nóbrega Cavalcanti, Mara Rúbia Fernandes de Figueiredo, Marcelo  
13 Alcântara Holanda, Maria Inês Bueno de André Valery, Miguel Abidon Aidê, Moema  
14 Nudilemon Chatkin, Octávio Messeder, Paulo José Zimmermann Teixeira, Ricardo Luiz de Melo  
15 Martins e Rosali Teixeira da Rocha, em nome da Comissão de Infecções Respiratórias e Micoses  
16 –Sociedade Brasileira de Pneumologia e Tisiologia. Brazilian guidelines for community-acquired  
17 pneumonia in immunocompetent adults - 2009\*. *J Bras Pneumol*. 2009.
- 18 91. Boyles THB, A.; Calligaro, G. L.; Cohen, C.; Dheda, K.; Maartens, G.; Richards, G. A.;  
19 Smit, R. Z.; Smith, C.; Wasserman, S.; Whitelaw, A. C.; Feldman, C. South African guideline  
20 for the management of communityacquired pneumonia in adults. *Journal of Thoracic Disease*.  
21 1469;9(6):1469-502.
- 22 92. Chaves NJ PG, Biggs BA, Thambiran A, Smith M, Williams J, Gardiner J, Davis JS; on  
23 behalf of the Australasian Society for Infectious Diseases and Refugee Health Network of  
24 Australia Guidelines writing group. Recommendations for comprehensive post-arrival health  
25 assessment for people from refugee-like backgrounds australasian society for infectious diseases  
26 And refugee health network of australia 2nd edition. 2010.
- 27 93. Anonymous. Guidance for national tuberculosis programmes on the management of  
28 tuberculosis in children. World Health Organization 2nd WHO Guidelines Approved by the  
29 Guidelines Review Committee. 2014.
- 30 94. Guidelines on the management of latent tuberculosis infection. World Health  
31 Organisation Guidelines. 2015.
- 32 95. Recommendation on 36 months isoniazid preventive therapy to adults and adolescents  
33 living with HIV in resource-constrained and high TB and HIV-prevalence settings: 2015 update.  
34 World Health Organisation Guidelines. 2015.
- 35 96. Intensified tuberculosis case-finding and isoniazid preventive therapy for people living  
36 with HIV in resource-constrained settings. World Health Organisation HIV Guidelines. 2011.
- 37 97. Organization WH. Latent tuberculosis infection Updated and consolidated guidelines for  
38 programmatic management. 2018.
- 39 98. Organization WH. Recommendations for management of common childhood conditions  
40 Newborn conditions, dysentery, pneumonia, oxygen use and delivery, common causes of fever,  
41 severe acute malnutrition and supportive care. 2012.
- 42 99. Prevention CfDca. Managing Drug Interactions in the Treatment of HIV-Related  
43 Tuberculosis. 2013.
- 44 100. Johnston A, Kelly SE, Hsieh SC, Skidmore B, Wells GA. Systematic reviews of clinical  
45 practice guidelines: a methodological guide. *J Clin Epidemiol*. 2019;108:64-  
46 76.(doi):10.1016/j.jclinepi.2018.11.030. Epub Dec 5.
- 47 101. Tonelli M, Connor Gorber S, Moore A, Thombs BD, Canadian Task Force on Preventive  
48 Health C. Recommendations on routine screening pelvic examination: Canadian Task Force on  
49  
50  
51  
52  
53  
54  
55  
56  
57  
58  
59  
60

1  
2  
3 Preventive Health Care adoption of the American College of Physicians guideline. Can Fam  
4 Physician. 2016;62(3):211-4.

5 102. Darzi A, Abou-Jaoude EA, Agarwal A, Lakis C, Wiercioch W, Santesso N, et al. A  
6 methodological survey identified eight proposed frameworks for the adaptation of health related  
7 guidelines. J Clin Epidemiol. 2017;86:3-10.(doi):10.1016/j.jclinepi.2017.01.016. Epub Apr 13.

8 103. Organization WH. Global antimicrobial resistance and use surveillance system (GLASS)  
9 report. 2020.

10 104. Organization WH. Worldwide country situation analysis: response to antimicrobial  
11 resistance2015. Available from:

12 [https://apps.who.int/iris/bitstream/handle/10665/163468/9789241564946\\_eng.pdf?sequence=1](https://apps.who.int/iris/bitstream/handle/10665/163468/9789241564946_eng.pdf?sequence=1).

13 105. Organization WH. WHO Model Lists of Essential Medicines. 2019.

14 106. Foundation AtM. Antimicrobial Resistance Benchmark 2018. Available from:

15 [https://acesstomedicinefoundation.org/media/uploads/downloads/5bc5edd8367eb\\_Antimicrobial-Resistance-Benchmark-2018.pdf](https://acesstomedicinefoundation.org/media/uploads/downloads/5bc5edd8367eb_Antimicrobial-Resistance-Benchmark-2018.pdf).



### Figure legends

Figure 1: Flow diagram of the guideline selection process; PG=Practice guideline. Trip=Turing Research Into Practice. G-I-N=Guidelines International Network. CPG infobase=Canadian Medical Association Clinical Practice Guideline Infobase. BIGG=International database of GRADE guidelines. Out of scope=does not include recommendations on antibiotic selection or prescribing; does not have a significant section on tuberculosis, gonorrhoea, or respiratory tract infections.

Figure 2: Number of regional guideline recommendations that consider antimicrobial resistance.

Figure 3: Contextualization of Grading of Recommendations Assessment, Development and Evaluation (GRADE) Evidence to Decision (EtD) frameworks in current guidelines.

Figure 4: Number of internationally and regionally developed guidelines with considerations of Grading of Recommendations Assessment, Development and Evaluation (GRADE) Evidence to Decision (EtD) frameworks.

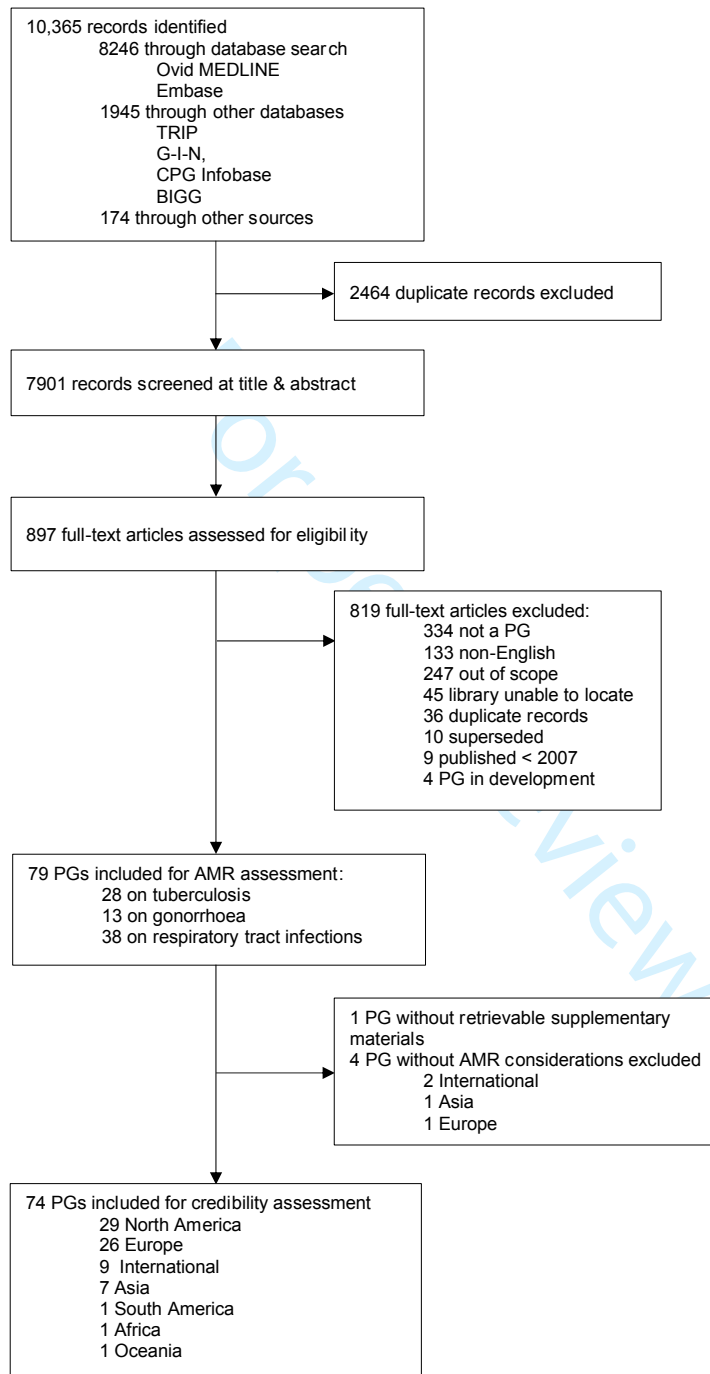

49 *Figure 1: Flow diagram of the guideline selection process*

50 PG=Practice guideline. Trip=Turing Research Into Practice. G-I-N=Guidelines International Network.  
51 CPG infobase=Canadian Medical Association Clinical Practice Guideline Infobase.  
52 BIGG=International database of GRADE guidelines. Out of scope=does not include recommendations  
53 on antibiotic selection or prescribing; does not have a significant section on tuberculosis, gonorrhoea,  
54 or respiratory tract infections.

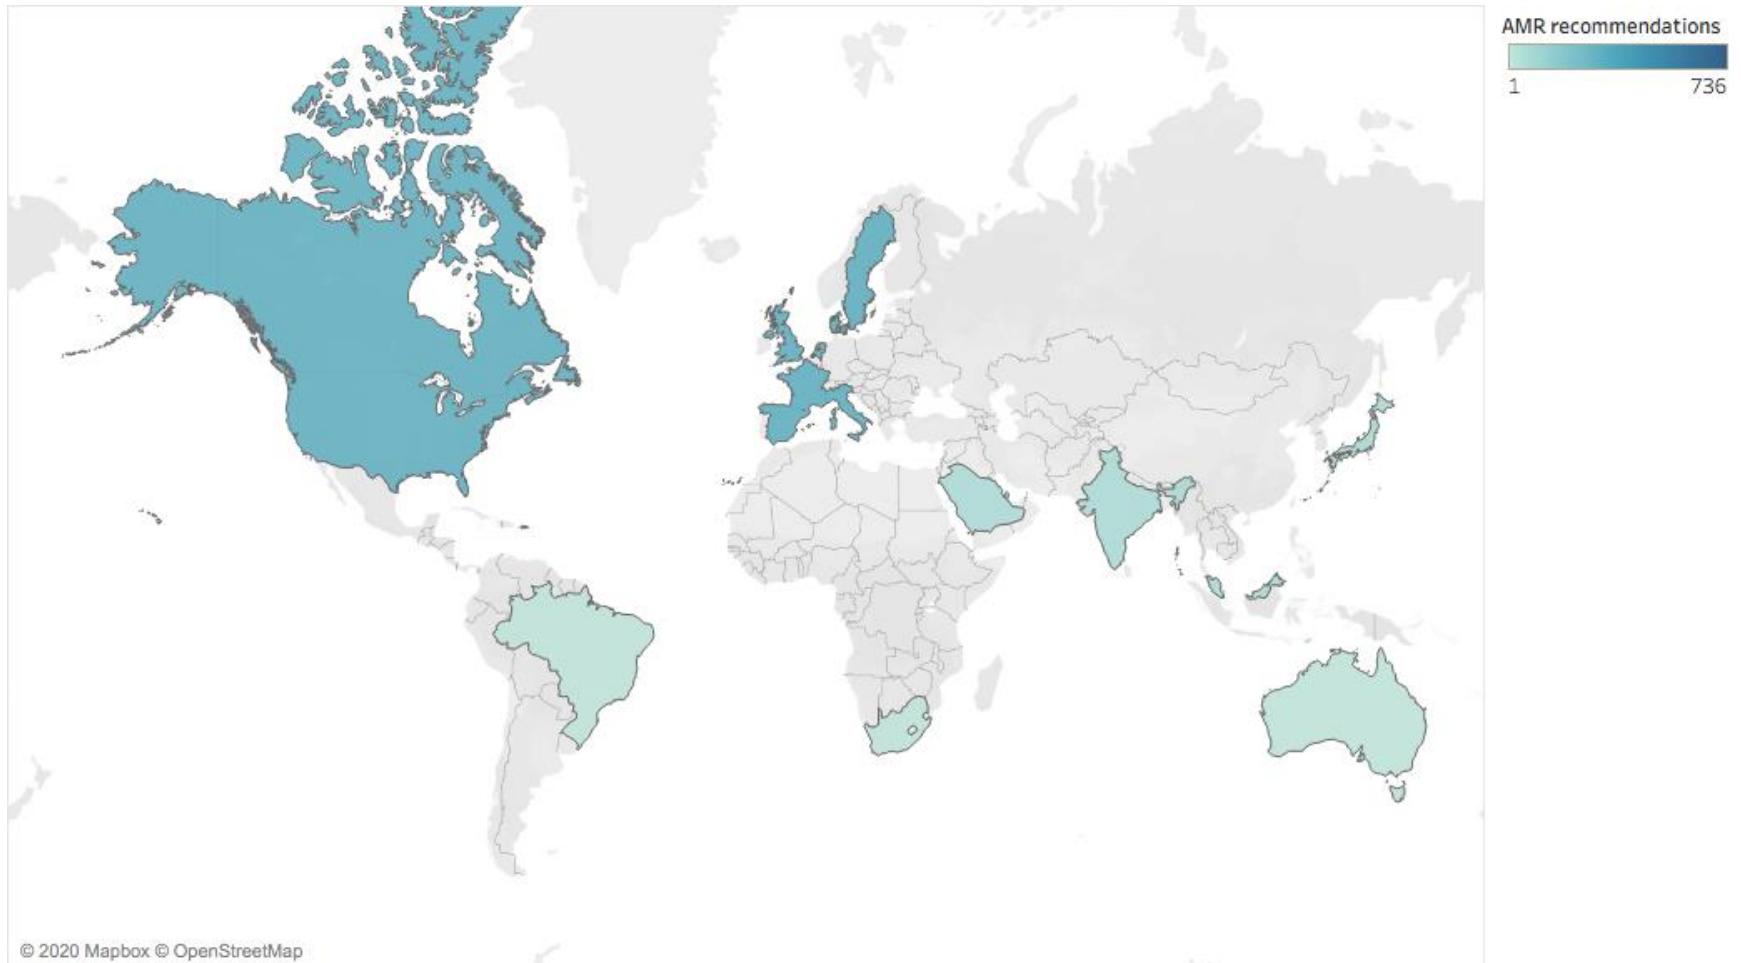

Figure 2: Number of regional guideline recommendations that consider antimicrobial resistance

1  
2  
3  
4  
5  
6  
7  
8  
9  
10  
11  
12  
13  
14  
15  
16  
17  
18  
19  
20  
21  
22  
23  
24  
25  
26  
27  
28  
29  
30  
31  
32  
33  
34  
35  
36  
37  
38  
39  
40  
41  
42  
43  
44  
45  
46  
47

1  
2  
3  
4  
5  
6  
7  
8  
9  
10  
11  
12  
13  
14  
15  
16  
17  
18  
19  
20  
21  
22  
23  
24  
25  
26  
27  
28  
29  
30  
31  
32  
33  
34  
35  
36  
37  
38  
39  
40  
41  
42  
43  
44  
45  
46  
47  
48  
49  
50  
51  
52  
53  
54  
55  
56  
57  
58  
59  
60



Figure 3: Contextualization of Grading of Recommendations Assessment, Development and Evaluation (GRADE) Evidence to Decision (EtD) frameworks in current guidelines

review only

Considering Evidence to Decision criteria by developer

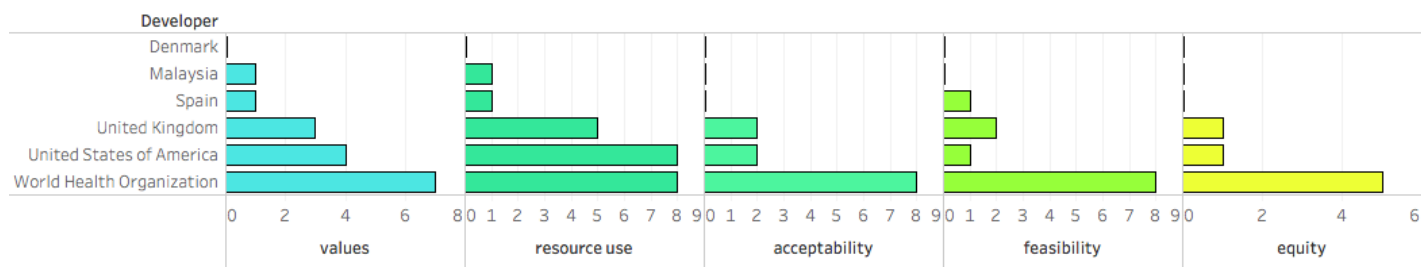

Figure 4: Number of internationally and regionally developed guidelines with considerations of Grading of Recommendations Assessment, Development and Evaluation (GRADE) Evidence to Decision (EtD) frameworks

## Supplement

## Extra figures &amp; tables

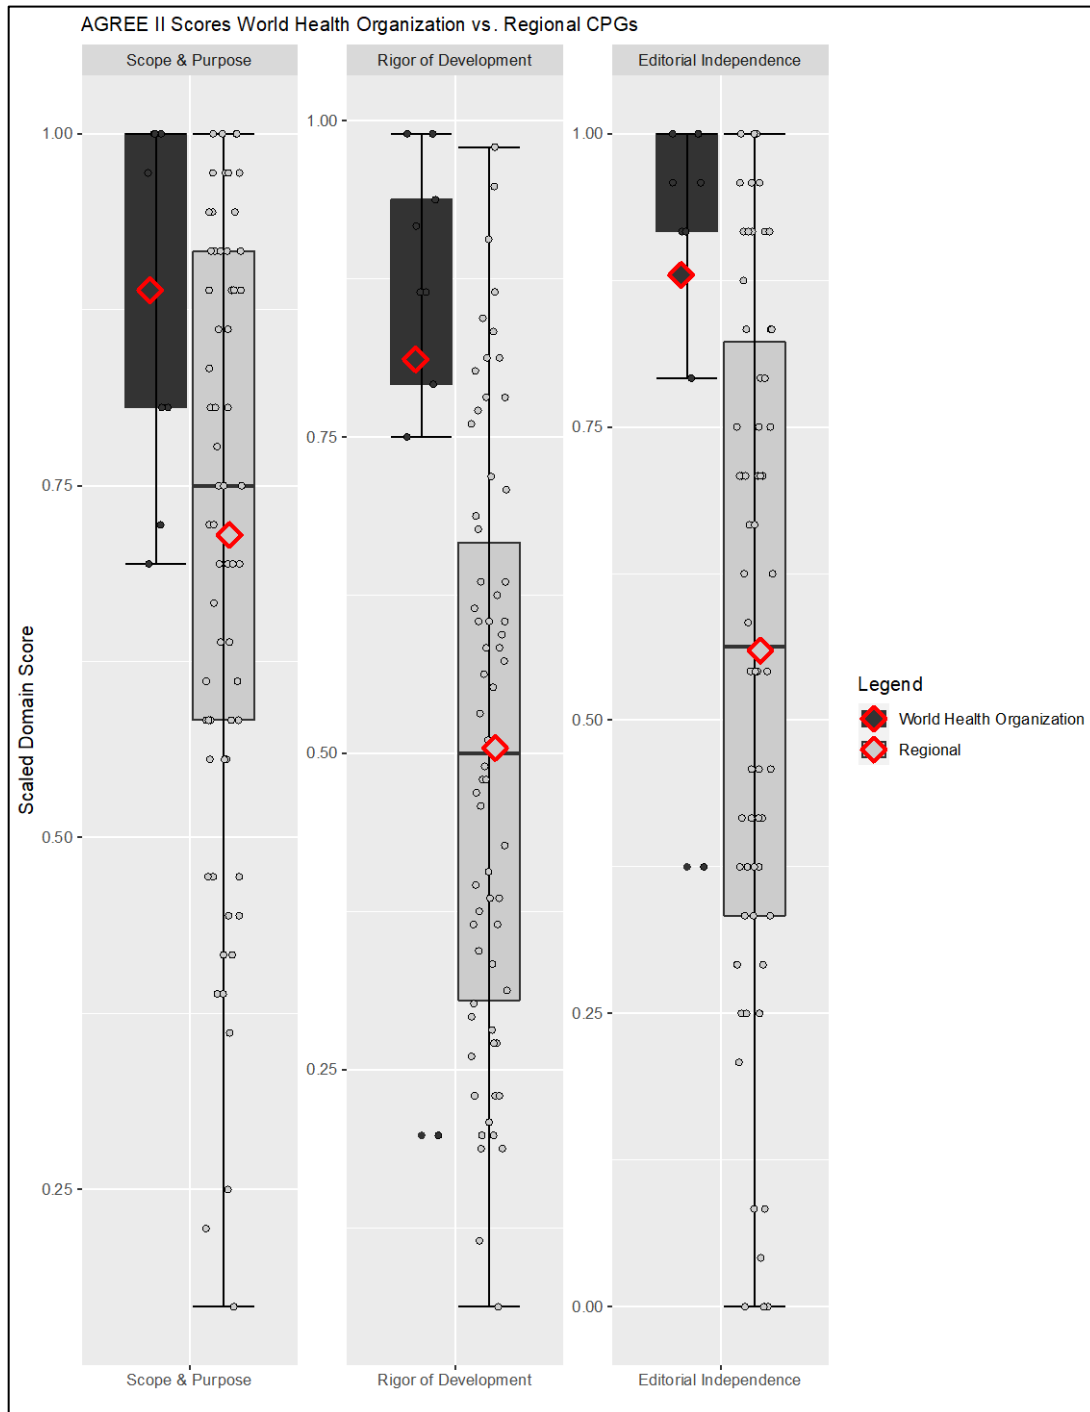

Figure 1S: Boxplot of AGREE II scores comparing World Health Organization and regional guidelines

AGREE II = Appraisal of Guidelines for Research & Evaluation II Instrument; Dark grey dots = World Health Organization guidelines; light grey dots = regional guidelines. Scope and purpose = domain one; rigor of development = domain three; editorial independence = domain six.

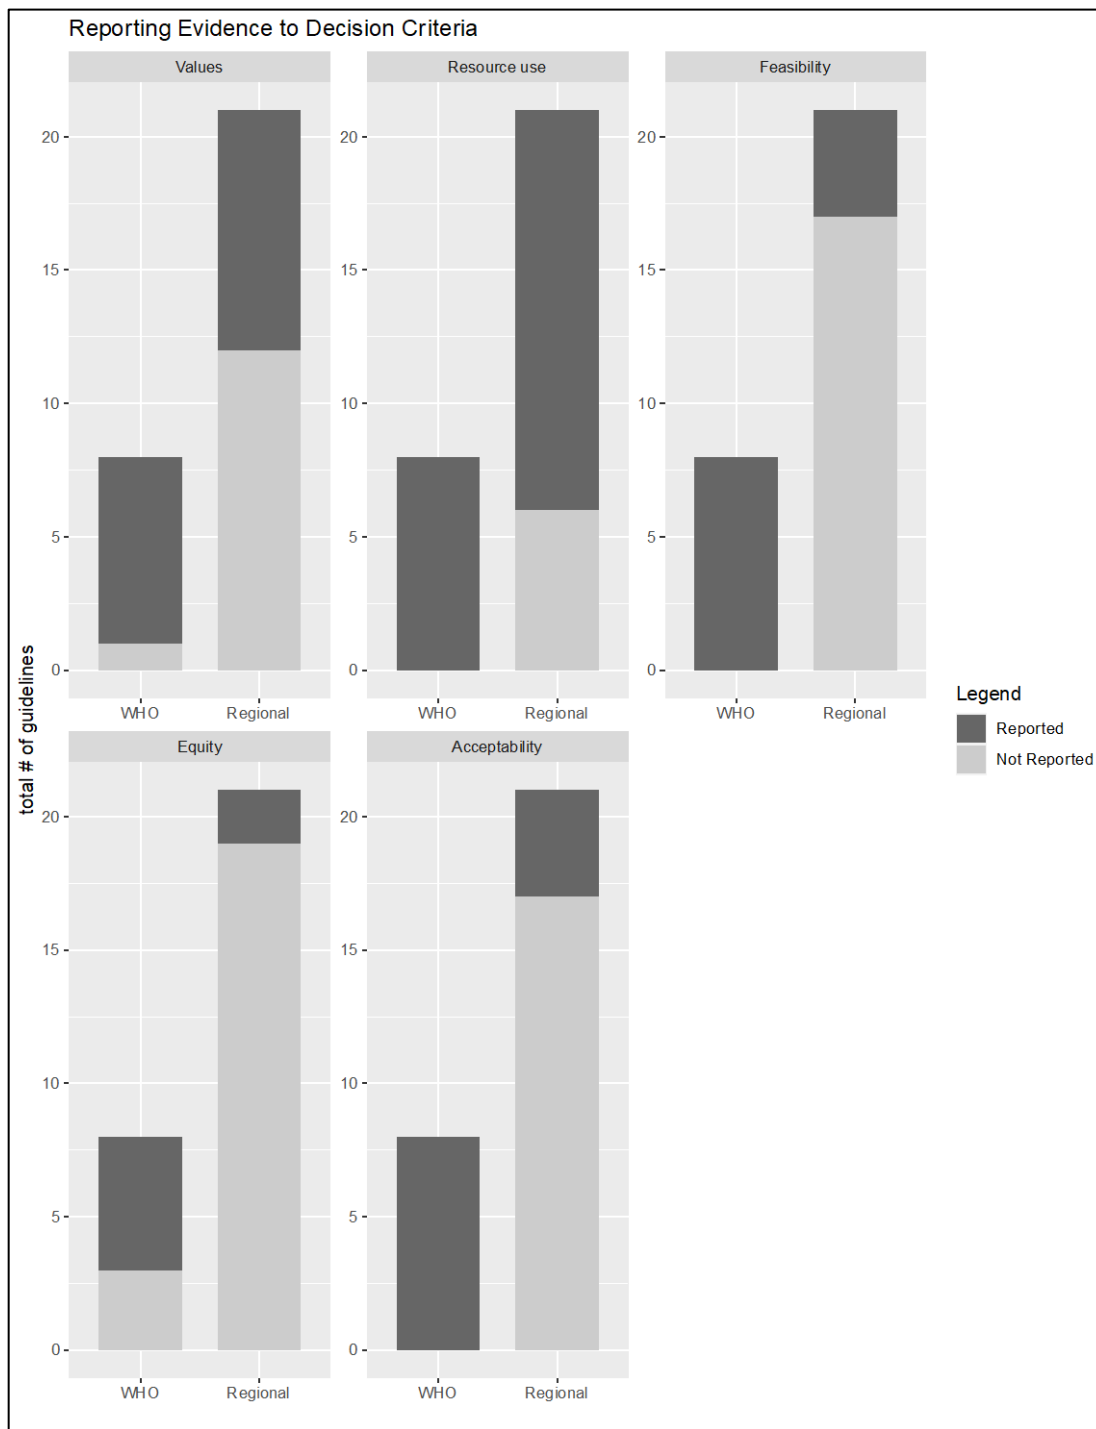

Figure 2S: World Health Organization versus regional guidelines meeting AGREE II scores  $\geq 60\%$  reporting GRADE Evidence to Decision Frameworks  
 29/75 guidelines with AMR considerations had a scaled domain score of  $\geq 60\%$ ; EtD criteria = evidence to decision criteria: values, resource use, feasibility, acceptability, and equity

Supplemental Table 1S: Research question in PICAR format

| PICAR item                                                      |                                                                                                                                                                                                                                                                                                                                                                                                                                                                                                                          |
|-----------------------------------------------------------------|--------------------------------------------------------------------------------------------------------------------------------------------------------------------------------------------------------------------------------------------------------------------------------------------------------------------------------------------------------------------------------------------------------------------------------------------------------------------------------------------------------------------------|
| <b>P: Population, clinical indications(s), and condition(s)</b> | 1) Tuberculosis; 2) Gonorrhoea; and 3) Respiratory tract infections: otitis media, pharyngitis, sinusitis, and community acquired pneumonia.                                                                                                                                                                                                                                                                                                                                                                             |
| <b>I: Intervention(s)</b>                                       | Any intervention that treats tuberculosis, gonorrhoea, and respiratory tract infections.                                                                                                                                                                                                                                                                                                                                                                                                                                 |
| <b>C: Comparator(s), Comparison(s), and (key) content</b>       | Any comparator.                                                                                                                                                                                                                                                                                                                                                                                                                                                                                                          |
| <b>A: Attributes of eligible guidelines</b>                     | <p><b>Publication year:</b> 2007 and above.</p> <p><b>Language of publication:</b> English.</p> <p><b>Scope: International and regional</b> guidelines.</p> <p><b>Purpose:</b> provide a recommendation on antibiotic selection and prescribing.</p> <p><b>Format:</b> any.</p> <p><b>Specific methodological standards:</b> guidelines that meet the AGREE II cut off score <math>\geq 60\%</math> in scope and purpose (domain one), rigor of development (domain three), and editorial independence (domain six).</p> |
| <b>R: Recommendation characteristics</b>                        | <p>At least one recommendation considers AMR.</p> <p><b>Location of recommendation:</b> anywhere within the guideline text, tables, and/or decision paths.</p>                                                                                                                                                                                                                                                                                                                                                           |



## Search strategy Ovid Medline and Embase

Database: Embase <1974 to 2019 June 07>, OVID Medline Epub Ahead of Print, In-Process & Other Non-Indexed Citations, Ovid MEDLINE(R) Daily and Ovid MEDLINE(R) 1946 to Present

## Search Strategy:

-----

- 1 (tuberculosis or tuberculous or TB).mp. (510746)
- 2 (gonoc\* or gonorr\*).mp. (58460)
- 3 pneumonia\*.mp. (557015)
- 4 strepto\*.mp. (531324)
- 5 (pneumonia\* adj2 strepto\*).mp. (83649)
- 6 1 or 2 or 5 (648159)
- 7 exp clinical pathway/ (14358)
- 8 exp clinical protocol/ (252634)
- 9 exp consensus/ (72535)
- 10 exp consensus development conference/ (35258)
- 11 exp consensus development conferences as topic/ (26540)
- 12 critical pathways/ (14358)
- 13 exp guideline/ (32021)
- 14 guidelines as topic/ (375998)
- 15 exp practice guideline/ (526549)
- 16 practice guidelines as topic/ (381407)
- 17 health planning guidelines/ (93323)
- 18 (guideline or practice guideline or consensus development conference or consensus development conference, NIH).pt. (40981)
- 19 (position statement\* or policy statement\* or practice parameter\* or best practice\*).ti,ab,kf,kw. (71605)
- 20 (standards or guideline or guidelines).ti,kf,kw. (243012)
- 21 ((practice or treatment\* or clinical) adj guideline\*).ab. (90132)
- 22 (CPG or CPGs).ti. (12033)
- 23 consensus\*.ti,kf,kw. (53111)
- 24 consensus\*.ab. /freq=2 (52722)
- 25 ((critical or clinical or practice) adj2 (path or paths or pathway or pathways or protocol\*)).ti,ab,kf,kw. (47116)
- 26 recommendat\*.ti,kf,kw. (85035)
- 27 (care adj2 (standard or path or paths or pathway or pathways or map or maps or plan or plans)).ti,ab,kf,kw. (142098)
- 28 (algorithm\* adj2 (screening or examination or test or tested or testing or assessment\* or diagnosis or diagnoses or diagnosed or diagnosing)).ti,ab,kf,kw. (16221)
- 29 (algorithm\* adj2 (pharmacotherap\* or chemotherap\* or chemotreatment\* or therap\* or treatment\* or intervention\*)).ti,ab,kf,kw. (22274)
- 30 or/7-29 (1489076)
- 31 6 and 30 (17406)
- 32 limit 31 to yr="2007 -Current" (11340)
- 33 (randomised or randomized or study or trial).ti. (3257255)
- 34 32 not 33 (10455)
- 35 limit 34 to (conference abstract or editorial or erratum or letter or tombstone or address or autobiography or biography or case reports or clinical trial, all or clinical trial protocol or clinical trial protocols as topic or clinical trial or comment or controlled clinical trial or interview or news or newspaper article or patient education handout or personal narrative or portrait or pragmatic clinical trial

1  
2  
3 or randomized controlled trial) [Limit not valid in Embase,Ovid MEDLINE(R),Ovid MEDLINE(R) Daily  
4 Update,Ovid MEDLINE(R) In-Process,Ovid MEDLINE(R) Publisher; records were retained] (2878)

5 36 34 not 35 (7577)

6 37 limit 36 to yr="2014 -Current" (3831)

7 38 limit 36 to yr="2007 - 2014" (4415)

8 39 remove duplicates from 38 (3464)

9 40 remove duplicates from 37 (2937)

10 41 39 or 40 (5910)

11

12

13

14

15

16

17

18

19

20

21

22

23

24

25

26

27

28

29

30

31

32

33

34

35

36

37

38

39

40

41

42

43

44

45

46

47

48

49

50

51

52

53

54

55

56

57

58

59

60

Supplemental Table 2S: List of websites of organizations and associations that provide guidelines

| International                                                                                                                                                                                                                                  | Canada                                                                                                                                                                                                                                     |
|------------------------------------------------------------------------------------------------------------------------------------------------------------------------------------------------------------------------------------------------|--------------------------------------------------------------------------------------------------------------------------------------------------------------------------------------------------------------------------------------------|
| The World Health Organization (WHO):<br><a href="https://www.who.int">https://www.who.int</a>                                                                                                                                                  | The Public Health Agency of Canada (PHAC):<br><a href="https://www.canada.ca/en/public-health.html">https://www.canada.ca/en/public-health.html</a>                                                                                        |
| The Centres for Disease Control and Prevention (CDC): <a href="https://www.cdc.gov">https://www.cdc.gov</a>                                                                                                                                    | Public Health Ontario (PHO):<br><a href="https://www.publichealthontario.ca">https://www.publichealthontario.ca</a>                                                                                                                        |
| The Scottish Intercollegiate Guidelines Network (SIGN): <a href="https://www.sign.ac.uk">https://www.sign.ac.uk</a>                                                                                                                            | Pan Canadian Public Health Network:<br><a href="http://www.phn-rsp.ca/index-eng.php">http://www.phn-rsp.ca/index-eng.php</a>                                                                                                               |
| The Robert Koch Institute (RKI):<br><a href="https://www.rki.de/EN/Home/homepage_node.html">https://www.rki.de/EN/Home/homepage_node.html</a>                                                                                                  | The Canadian Task Force on Preventative Health Care (CTFPHC): <a href="https://canadiantaskforce.ca">https://canadiantaskforce.ca</a>                                                                                                      |
| The National Institute for Health and Care Excellence (NICE): <a href="https://www.nice.org.uk">https://www.nice.org.uk</a>                                                                                                                    | The College of Physicians and Surgeons of Ontario (CPSO): <a href="https://www.cpso.on.ca">https://www.cpso.on.ca</a>                                                                                                                      |
| The European Centre for Disease Prevention and Control (ECDC):<br><a href="https://ecdc.europa.eu/en/home">https://ecdc.europa.eu/en/home</a>                                                                                                  | The Guidelines Advisory Committee (GAC):<br><a href="https://www.gacguidelines.ca">https://www.gacguidelines.ca</a>                                                                                                                        |
| The Australian Government National Health and Medical Research Council (NHMRC):<br><a href="https://www.nhmrc.gov.au">https://www.nhmrc.gov.au</a>                                                                                             | The Canadian Agency for Drugs and Technologies in Health (CADTH): <a href="https://www.cadth.ca">https://www.cadth.ca</a>                                                                                                                  |
| Australian Clinical Practice Guidelines:<br><a href="https://www.clinicalguidelines.gov.au">https://www.clinicalguidelines.gov.au</a>                                                                                                          | Association of Medical Microbiology of Infectious Disease Canada: <a href="https://www.ammi.ca">https://www.ammi.ca</a>                                                                                                                    |
| New Zealand Guidelines Group:<br><a href="https://www.health.govt.nz/about-ministry/ministry-health-websites/new-zealand-guidelines-group">https://www.health.govt.nz/about-ministry/ministry-health-websites/new-zealand-guidelines-group</a> | The Registered Nurses Association of Ontario's Best Practice Guidelines (NAOBPG):<br><a href="https://rnao.ca/bpg">https://rnao.ca/bpg</a>                                                                                                 |
| United States Preventative Services Task Force:<br><a href="https://www.uspreventiveservicestaskforce.org">https://www.uspreventiveservicestaskforce.org</a>                                                                                   | Canadian Paediatric Society: <a href="https://www.cps.ca">https://www.cps.ca</a>                                                                                                                                                           |
| Infectious Diseases Society of America:<br><a href="https://www.idsociety.org">https://www.idsociety.org</a>                                                                                                                                   | British Columbia (BC) Guidelines:<br><a href="https://www2.gov.bc.ca/gov/content/health/practitioner-professional-resources/bc-guidelines">https://www2.gov.bc.ca/gov/content/health/practitioner-professional-resources/bc-guidelines</a> |
| American Academy of Family Physicians<br><a href="https://www.aafp.org">https://www.aafp.org</a>                                                                                                                                               | British Columbia Centre for Disease Control (BCCDC): <a href="http://www.bccdc.ca">http://www.bccdc.ca</a>                                                                                                                                 |
| The American Thoracic Society (ATS):<br><a href="https://www.thoracic.org">https://www.thoracic.org</a>                                                                                                                                        | Towards Optimized Practice (TOP):<br><a href="http://www.topalbertadoctors.org/home/">http://www.topalbertadoctors.org/home/</a>                                                                                                           |
|                                                                                                                                                                                                                                                | Winnipeg Regional Health Authority (WHRA):<br><a href="http://www.wrha.mb.ca">http://www.wrha.mb.ca</a>                                                                                                                                    |

Supplemental Table 3S: Definition of recommendations that consider antibiotic resistance

| Recommendation                                | Definition                                                                                                                                                                                                                                                                                                                                                                                                                                                                                                                                                                                                                                                                                                                                                                                                                                                                  | Example                                                                                                                                                                                                                                                                                                                                                                                                                                                                                                               |
|-----------------------------------------------|-----------------------------------------------------------------------------------------------------------------------------------------------------------------------------------------------------------------------------------------------------------------------------------------------------------------------------------------------------------------------------------------------------------------------------------------------------------------------------------------------------------------------------------------------------------------------------------------------------------------------------------------------------------------------------------------------------------------------------------------------------------------------------------------------------------------------------------------------------------------------------|-----------------------------------------------------------------------------------------------------------------------------------------------------------------------------------------------------------------------------------------------------------------------------------------------------------------------------------------------------------------------------------------------------------------------------------------------------------------------------------------------------------------------|
| <p>Considers resistance if</p>                | <p>1. The recommendation is for a <b>population</b> that is infected with a resistant organism (i.e. people with drug-resistant TB); <b>OR</b></p> <p>2. The recommendation is supported by <b>country-specific resistance patterns</b>;<sup>1</sup> <b>OR</b></p> <p>3. The recommendation question (or PICO question) that has resistance as an <b>outcome</b>. <b>OR</b></p> <p>The <b>outcome</b> may be any of the following:</p> <p>‘resistance’, ‘resistant’, ‘drug-resistance’, ‘antibiotic resistance’<br/> ‘antimicrobial resistance’, ‘antimicrobial in vitro resistance’,<br/> ‘acquired drug-resistance’</p> <p>4. The recommendation is to prescribe narrow-spectrum antibiotics over broad-spectrum antibiotics. <b>OR</b></p> <p>5. A recommendation for no antibiotic prescription or back-up antibiotic prescription (i.e. watchful waiting approach)</p> | <p><b>Example: A recommendation that considers country-specific resistance, and has a resistance-related outcome.</b></p> <p>“In adults and adolescents with gonococcal oropharyngeal infections, the WHO STI guideline suggests dual therapy over single therapy...and suggests single therapy (<u>based on recent local resistance data confirming susceptibility to the antimicrobial</u>).”</p> <p>The PICO table that was provided has ‘<u>antimicrobial in vitro resistance</u>’ as an outcome.<sup>2</sup></p> |
| <p><b>DOES NOT</b> consider resistance if</p> | <p>1. The recommendation is <b>NOT</b> for a population that is infected with a resistant organism. <b>AND</b></p> <p>2. The recommendation is <b>NOT</b> supported by country-specific resistant patterns. <b>AND</b></p> <p>3. The recommendation question (or PICO question) <b>DOES NOT</b> have any resistant outcomes. <b>AND</b></p> <p>4. Recommendation <b>DOES NOT</b> prescribe narrow-spectrum antibiotics. <b>AND</b></p>                                                                                                                                                                                                                                                                                                                                                                                                                                      | <p><b>Example: A recommendation that is not intended for a population that is infected with a resistant organism, nor is it supported by country specific resistant patterns, nor does it have outcomes pertaining to resistance.</b></p> <p>The BASHH 2013 guidelines recommended that “ceftriaxone 500mg intramuscularly single dose followed by oral Doxycycline 100mg bd plus oral Metronidazole 400mg bd both for 12 weeks was recommended for children over the age of 12.”<sup>3</sup></p>                     |

<sup>1</sup> Informed by the Elias et al 2017.

<sup>2</sup> WHO guidelines for the Treatment of Neisseria gonorrhoeae. 2016.

<sup>3</sup> BASHH 2013 Management of gonorrhoea and pelvic inflammatory disease in children.

1  
2  
3  
4  
5  
6  
7  
8  
9  
10  
11  
12  
13  
14  
15  
16  
17  
18  
19  
20  
21  
22  
23  
24  
25  
26  
27  
28  
29  
30  
31  
32  
33  
34  
35  
36  
37  
38  
39  
40  
41  
42  
43  
44  
45  
46  
47

|  |                                                                                                          |                                                                                                                                                                                                                                     |
|--|----------------------------------------------------------------------------------------------------------|-------------------------------------------------------------------------------------------------------------------------------------------------------------------------------------------------------------------------------------|
|  | 5. There are no recommendations on no antibiotic nor back-up antibiotic or no watchful-waiting approach. | For this recommendation, neither the guideline nor the supplementary materials mention that they considered England's resistance patterns when developing the recommendation, nor were there any outcomes pertaining to resistance. |
|--|----------------------------------------------------------------------------------------------------------|-------------------------------------------------------------------------------------------------------------------------------------------------------------------------------------------------------------------------------------|

For peer review only

1  
2  
3 **Details to extract and record from the guidelines<sup>4</sup>:**  
4

- 5 1. Type of source.  
6  
7 2. Organization.  
8  
9 3. Document title.  
10  
11 4. Website link  
12  
13 5. Reference  
14  
15 6. The date of publication of guidelines/recommendations.  
16  
17 7. Year of planned update of the guideline/recommendations and the systematic review.  
18  
19 8. Recommendation that considers AMR.  
20  
21 9. What type of evidence did the recommendation that considers resistance consider?  
22  
23 10. The recommendation focus (i.e. tuberculosis, gonorrhoea, or respiratory tract infections)  
24  
25 11. The guideline question matched to the recommendation.  
26  
27 12. The number of recommendations on antibiotic use that consider AMR in each guideline.  
28  
29 13. The direction of the recommendations: for or against, or others variations.  
30  
31 14. The strength of the recommendations.  
32  
33 15. Type of infection.  
34  
35 16. Setting: hospital or community (i.e. primary, secondary, and tertiary care settings, low- or high-  
36 income settings, etc.).  
37  
38 17. Target population (i.e. people with cephalosporin resistant *Neisseria gonorrhoeae*).  
39  
40 18. The systematic reviews that support the recommendation. This includes systematic review that  
41 supports the certainty of the effect, and the systematic review conducted for the values and  
42 preferences of patients, equity issues and applicability.  
43 a. We will record the publication year.  
44 b. The research questions in PICO format.  
45 c. Risk of Bias assessment conducted.  
46 d. Analysis method (i.e. meta-analysis).  
47 e. Year of planned update.  
48  
49 19. Type of evidence summary methods (narrative, GRADE tables including the summary of  
50 findings (SoF) table, evidence profiles (EP) table, or other evidence tables).  
51 a. Assessment of the certainty of the evidence for each outcome.  
52  
53  
54  
55

---

56 <sup>4</sup> Details are informed by GRADE-ADOLOPMENT paper, appendix 1, step 5.  
57  
58  
59  
60

1  
2  
3 20. EtD available.  
4

5 21. Criteria that influence the strength and direction of the recommendations are available or  
6 summarized. This includes:

- 7 a. The problem and its importance;  
8 b. The certainty of the evidence;  
9 c. The values and preferences of patients. Are the patient's values and preferences  
10 described?: yes with search strategy available; yes – systematic review without search  
11 strategy, yes–narrative; no; other (specify).  
12 d. The balance between health benefits, harms and burden;  
13 e. The resources that are required. Is the cost effectiveness described?: yes–Cost-  
14 effectiveness analysis; yes–systematic review without search strategy; yes–narrative; no;  
15 other (specify).  
16 f. The increase or decrease in equity; where there health inequity considerations?  
17 g. Acceptability: are stakeholder acceptability to most it is to the users and the public  
18 described; and  
19 h. The feasibility of the recommendation: is the feasibility described?  
20  
21

22 22. Reporting or describing the following EtD criteria (yes/no): values, resource use, acceptability,  
23 feasibility, equity.

- 24 a. How were they reported? Was the evidence buried within paragraphs, or easily found  
25 within the guideline through subheadings and tables?  
26 b. Was values, resource use, acceptability feasibility, or equity considerations part of their  
27 methodology? If so, the guideline/supplementary material actually report values, resource  
28 use, acceptability, feasibility, and equity?  
29 c. Type of evidence used to inform EtD criteria, i.e. research evidence or expert or expert  
30 opinion  
31  
32  
33  
34  
35  
36  
37  
38  
39  
40  
41  
42  
43  
44  
45  
46  
47  
48  
49  
50  
51  
52  
53  
54  
55  
56  
57  
58  
59  
60

*Supplemental Table 4S: Characteristics of excluded studies*

| Reference          | Publishing year | Guideline developer                                                                                                                                                                                                                                                                                                                                                                            | Continent     | Setting                            | Focus area                   | Reason for exclusion                          |
|--------------------|-----------------|------------------------------------------------------------------------------------------------------------------------------------------------------------------------------------------------------------------------------------------------------------------------------------------------------------------------------------------------------------------------------------------------|---------------|------------------------------------|------------------------------|-----------------------------------------------|
| Gupta, D. et al.   | 2012            | Indian Chest Society and National College of Chest Physicians                                                                                                                                                                                                                                                                                                                                  | Asia          | Secondary and tertiary             | Community-acquired pneumonia | Had a scaled domain score of < 60%            |
| Chow, A. et al.    | 2012            | Infectious Disease Society of America (IDSA)                                                                                                                                                                                                                                                                                                                                                   | North America | Community and emergency department | Sinusitis                    | One EtD criteria reported:<br>1. Resource use |
| Bignell, C. et al. | 2013            | The European Branch of the International Union against Sexually Transmitted Infections (IUSTI Europe); the European Academy of Dermatology and Venereology (EADV); the European Dermatology Forum (EDF); the Union of European Medical Specialists (UEMS). The European Centre for Disease Prevention and Control (ECDC) and the European Office of the World Health Organization (WHO-Europe) | Europe        | Primary care                       | Gonorrhoea                   | Had a scaled domain score of < 60%            |



|                                                  |      |                                                                                                                                           |               |                                      |                              |                                    |
|--------------------------------------------------|------|-------------------------------------------------------------------------------------------------------------------------------------------|---------------|--------------------------------------|------------------------------|------------------------------------|
| Centres for Disease Control and Prevention (CDC) | 2013 | Centre for Disease Control and Prevention (CDC)                                                                                           | North America | Secondary and tertiary               | Tuberculosis                 | Had a scaled domain score of < 60% |
| Wald, E. R. et al.                               | 2013 | American Academy of Pediatrics                                                                                                            | North America | Primary, secondary and tertiary care | Sinusitis                    | Had a scaled domain score of < 60% |
| Bignell, C.; Fitzgerald, M.                      | 2011 | British Association for Sexual Health and HIV (BASHH)                                                                                     | Europe        | Tertiary care                        | Gonorrhoea                   | Had a scaled domain score of < 60% |
| Harris, M.                                       | 2011 | British Thoracic Society                                                                                                                  | Europe        | Primary and secondary care           | Community-acquired pneumonia | Had a scaled domain score of < 60% |
| Migliori, G. B. et al.                           | 2012 | European Centre for Disease Prevention and Control (ECDC) and the European Respiratory Society (ERS)                                      | Europe        | Secondary and tertiary care          | Tuberculosis                 | Had a scaled domain score of < 60% |
| Workowski, K. A.; Bolan, G. A.                   | 2015 | Centre for Disease Control and Prevention (CDC)                                                                                           | North America | Primary, secondary and tertiary care | Gonorrhoea                   | Had a scaled domain score of < 60% |
| Woodhead, M.;                                    | 2011 | European Respiratory Society (ERS), in collaboration with The European Society for Clinical Microbiology and Infectious Diseases (ESCMID) | Europe        | Primary, secondary and tertiary care | Community-acquired pneumonia | Had a scaled domain score of < 60% |
| Spindler, C. et al.                              | 2012 | Swedish Society of Infectious                                                                                                             | Europe        | Secondary care                       | Community-acquired pneumonia | Had a scaled domain score of < 60% |

|                                                                         |      |                                                              |               |                                                                                                                                  |              |                                                                                                   |
|-------------------------------------------------------------------------|------|--------------------------------------------------------------|---------------|----------------------------------------------------------------------------------------------------------------------------------|--------------|---------------------------------------------------------------------------------------------------|
| Desrosiers, M et al.                                                    | 2011 | Canadian Society of Otolaryngology-Head and Neck Surgery     | North America | Primary and secondary care                                                                                                       | Sinusitis    | Had a scaled domain score of < 60%                                                                |
| Mayor, M. T.; Roett, M. A.; Uduhiri, K. A.                              | 2012 | American Academy of Family Physicians                        | North America | Primary care                                                                                                                     | Gonorrhoea   | Had a scaled domain score of < 60%                                                                |
| Thwaites, G.                                                            | 2009 | British Infection Society Guidelines                         | Europe        | Secondary and tertiary                                                                                                           | Tuberculosis | Had a scaled domain score of < 60%                                                                |
| Bignell, C.; Iusti/Who,                                                 | 2009 | IUSTI/WHO                                                    | Europe        | Secondary and tertiary                                                                                                           | Gonorrhoea   | Had a scaled domain score of < 60%                                                                |
| Abdul Rahaman, J. A.; Ker, H. B.; Yusof, M.; Hanafi, N. S.; Wong, J. L. | 2012 | Malaysian Family Physician                                   | Asia          | Primary care but it should also be useful to those in the secondary/tertiary care.                                               | Tuberculosis | Two EtD criteria reported:<br>1. Values<br>2. Resource use                                        |
| World Health Organization (WHO)                                         | 2014 | World Health Organization (WHO)                              | International | This document is targeted at national TB programmes, paediatricians and other health workers in low- and middle-income countries | Tuberculosis | Three EtD criteria reported:<br>1. Resource use<br>2. Acceptability<br>3. Feasibility             |
| National Institute for Health and Care Excellence (NICE)                | 2016 | The National Institute for Health and Care Excellence (NICE) | Europe        | Primary, secondary and tertiary                                                                                                  | Tuberculosis | Four EtD criteria reported:<br>1. Values<br>2. Resource use<br>3. Acceptability<br>4. Feasibility |

|                                                                                                               |      |                                                                                                                                          |               |                                                          |                                            |                                                                                |
|---------------------------------------------------------------------------------------------------------------|------|------------------------------------------------------------------------------------------------------------------------------------------|---------------|----------------------------------------------------------|--------------------------------------------|--------------------------------------------------------------------------------|
| Menendez, R. et al.                                                                                           | 2010 | Spanish Society of Pulmonology and Thoracic Surgery (SEPAR)                                                                              | Europe        | n/a                                                      | Community-acquired pneumonia               | Had a scaled domain score of < 60%                                             |
| Kaplan, J. E.; Benson, C.; Holmes, K. H.; Brooks, J. T.; Pau, A.; Masur, H.                                   | 2009 | Centre for Disease Control and Prevention (CDC)                                                                                          | North America | Primary, secondary and tertiary settings; high-resource  | Tuberculosis and CAP                       | Had a scaled domain score of < 60%                                             |
| World Health Organization (WHO)                                                                               | 2007 | World Health Organization (WHO)                                                                                                          | International | Resource constraint primary, secondary and tertiary care | Tuberculosis                               | Had a scaled domain score of < 60%                                             |
| National Institute for Health and Care Excellence (NICE)                                                      | 2008 | The National Institute for Health and Care Excellence (NICE)                                                                             | Europe        | Primary care                                             | Otitis media, rhino sinusitis, pharyngitis | Had a scaled domain score of < 60%                                             |
| British Thoracic Society                                                                                      | 2009 | British Thoracic Society                                                                                                                 | Europe        | Primary, secondary and tertiary care                     | Community-acquired pneumonia               | One EtD criteria reported:<br>1. Resource use                                  |
| Spanish Society for Epidemiology; Spanish Society of Primary Care Physicians; Spanish Society for Pulmonology | 2010 | Spanish Society for Epidemiology; Spanish Society of Primary Care Physicians; Spanish Society for Pulmonology and Thoracic Surgery, etc. | Europe        | Primary care                                             | Tuberculosis                               | Three EtD criteria reported:<br>1. Values<br>2. Resource use<br>3. Feasibility |

|                                                              |      |                                                                     |               |                                                                                                                                                                                                                            |                              |                                                                                  |
|--------------------------------------------------------------|------|---------------------------------------------------------------------|---------------|----------------------------------------------------------------------------------------------------------------------------------------------------------------------------------------------------------------------------|------------------------------|----------------------------------------------------------------------------------|
| and Thoracic Surgery, etc.                                   |      |                                                                     |               |                                                                                                                                                                                                                            |                              |                                                                                  |
| Infectious Disease Society of America (IDSA)                 | 2011 | Infectious Disease Society of America (IDSA)                        | North America | Primary, secondary and tertiary care                                                                                                                                                                                       | Community-acquired pneumonia | Had a scaled domain score of < 60%                                               |
| American Academy of Family Physicians                        | 2013 | American Academy of Pediatrics                                      | North America | Primary care                                                                                                                                                                                                               | Otitis media                 | Two EtD criteria reported:<br>1. Values<br>2. Resource use                       |
| National Institute for Health and Clinical Excellence (NICE) | 2014 | The National Institute for Health and Care Excellence (NICE)        | Europe        | Primary, secondary and tertiary                                                                                                                                                                                            | Community-acquired pneumonia | Two EtD criteria reported:<br>1. Values<br>2. Feasibility                        |
| American Academy of Otolaryngology                           | 2015 | American Academy of Otolaryngology—Head and Neck Surgery Foundation | North America | The guideline is intended for all clinicians who are likely to diagnose and manage adults with rhinosinusitis and applies to any setting in which an adult with rhinosinusitis would be identified, monitored, or managed. | Sinusitis                    | Three EtD criteria reported:<br>1. Values<br>2. Resource use<br>3. Acceptability |
| American Academy of Otolaryngology                           | 2016 | American Academy of Otolaryngology—Head and Neck                    | North America | Primary care                                                                                                                                                                                                               | Otitis media                 | Three EtD criteria reported:                                                     |

|                                                              |      |                                                                                                       |               |                                                                                                                                                                                                                                                                                                                      |                           |                                                  |
|--------------------------------------------------------------|------|-------------------------------------------------------------------------------------------------------|---------------|----------------------------------------------------------------------------------------------------------------------------------------------------------------------------------------------------------------------------------------------------------------------------------------------------------------------|---------------------------|--------------------------------------------------|
|                                                              |      | Surgery Foundation, the American Academy of Pediatrics, and the American Academy of Family Physicians |               |                                                                                                                                                                                                                                                                                                                      |                           | 1. Values<br>2. Resource use<br>3. Acceptability |
| Infectious Disease Society of America (IDSA)                 | 2016 | Infectious Disease Society of America (IDSA)                                                          | North America | well-resourced; low-incidence settings                                                                                                                                                                                                                                                                               | Tuberculosis              | No EtD reported                                  |
| The National Institute for Health and Care Excellence (NICE) | 2017 | The National Institute for Health and Care Excellence (NICE)                                          | Europe        | Primary, secondary and tertiary care                                                                                                                                                                                                                                                                                 | Sinusitis                 | Had a scaled domain score of < 60%               |
| Institute for Clinical Systems Improvement                   | 2017 | Institute for Clinical Systems Improvement                                                            | North America | ambulatory care                                                                                                                                                                                                                                                                                                      | Pharyngitis and sinusitis | One EtD criteria reported:<br>1. Resource use    |
| The National Institute for Health and Care Excellence (NICE) | 2018 | The National Institute for Health and Care Excellence (NICE)                                          | Europe        | Primary and secondary care (For the treatment of acute uncomplicated otitis media in primary, secondary or other care settings (for example walk-in-centres, urgent care, and minor ailment schemes) either by prescription or by any other legal means of supply of medicine (for example Patient Group Direction). | Otitis media              | Had a scaled domain score of < 60%               |

|                                                                                |      |                                                                                                     |               |                                                                                                                                                                                    |                              |                                               |
|--------------------------------------------------------------------------------|------|-----------------------------------------------------------------------------------------------------|---------------|------------------------------------------------------------------------------------------------------------------------------------------------------------------------------------|------------------------------|-----------------------------------------------|
| British Association for Sexual Health and HIV                                  | 2019 | British Association for Sexual Health and HIV (BASHH)                                               | Europe        | The guidelines are primarily aimed at level 3 sexual health services within the United Kingdom (UK) although the principles of the recommendations could be adopted at all levels. | Gonorrhoea                   | Had a scaled domain score of < 60%            |
| Ministry of Public Health/Qatar                                                | 2016 | Ministry of Public Health of Qatar (MOPH)                                                           | Asia          | primary care and secondary care settings                                                                                                                                           | Community-acquired pneumonia | Had a scaled domain score of < 60%            |
| Infectious Disease Society of America (IDSA)                                   | 2012 | Infectious Disease Society of America (IDSA)                                                        | North America | healthcare providers who care for adult and pediatric patients with group A streptococcal pharyngitis                                                                              | Pharyngitis                  | One EtD criteria reported:<br>1. Resource use |
| Ministry of Health Malaysia<br>Ministry of Higher Education and private sector | 2012 | Ministry of Health Malaysia<br>Ministry of Higher Education and private sector                      | Asia          | Outpatient, inpatient and community setting                                                                                                                                        | Otitis media                 | No EtD criteria reported                      |
| Borisov, A. S et al.                                                           | 2018 | Centre for Disease Control and Prevention (CDC)                                                     | North America | n/a                                                                                                                                                                                | Tuberculosis                 | Had a scaled domain score of < 60%            |
| Lee, M. S. et al.                                                              | 2018 | the Korean Society for Chemotherapy, the Korean Society of Infectious Diseases the Korea Academy of | Asia          | Primary care                                                                                                                                                                       | Community-acquired pneumonia | Had a scaled domain score of < 60%            |

|                       |      |                                                                                                                                                                                                                |               |                     |              |                                    |
|-----------------------|------|----------------------------------------------------------------------------------------------------------------------------------------------------------------------------------------------------------------|---------------|---------------------|--------------|------------------------------------|
|                       |      | Tuberculosis and Respiratory Diseases, the Korean Association of Family Medicine, the Korean Medical Practitioners Association, and the National Evidence-based Healthcare Collaborating Agency                |               |                     |              |                                    |
| Pogany, L. et al.     | 2015 | Canadian Family Physician                                                                                                                                                                                      | North America | Primary care        | Gonorrhoea   | Had a scaled domain score of < 60% |
| Stahl, J. P. et al.   | 2017 | French Infectious Diseases Society (French acronym SPILF); National educational association for teaching therapeutics (French acronym APNET); French Society of Internal Medicine (French acronym SNFMI), etc. | Europe        | n/a                 | Tuberculosis | Had a scaled domain score of < 60% |
| Heidemann, CH. et al. | 2016 | Danish Health and Medicines Authority and the Danish Society of Otorhinolaryngology, Head and Neck Surgery                                                                                                     | Europe        | primary health care | Otitis media | No EtD criteria reported           |

|                                                                                                                      |                                                        |      |                                                                                                                                                                                                       |               |                                                                                                                                                                          |              |                                                                                                   |
|----------------------------------------------------------------------------------------------------------------------|--------------------------------------------------------|------|-------------------------------------------------------------------------------------------------------------------------------------------------------------------------------------------------------|---------------|--------------------------------------------------------------------------------------------------------------------------------------------------------------------------|--------------|---------------------------------------------------------------------------------------------------|
| 1<br>2<br>3<br>4<br>5<br>6<br>7<br>8<br>9<br>10<br>11                                                                | The Scottish Intercollegiate Guidelines Network (SIGN) | 2010 | The Scottish Intercollegiate Guidelines Network (SIGN)                                                                                                                                                | Europe        | Primary and secondary (general practitioners, nurses, paediatricians, pharmacists, otolaryngologists, anaesthetists, public health specialists)                          | Pharyngitis  | Two EtD criteria reported:<br>1. Values<br>2. Resource use                                        |
| 12<br>13<br>14<br>15<br>16<br>17<br>18<br>19<br>20                                                                   | World Health Organization (WHO)                        | 2011 | World Health Organization (WHO)                                                                                                                                                                       | International | Resource constrained settings                                                                                                                                            | Tuberculosis | Four EtD criteria reported:<br>1. Values<br>2. Resource use<br>3. Acceptability<br>4. Feasibility |
| 21<br>22<br>23<br>24<br>25<br>26<br>27                                                                               | American Academy of Otolaryngology                     | 2015 | American Academy of Otolaryngology                                                                                                                                                                    | North America | (Primary, secondary and tertiary care) any setting in which an adult with rhinosinusitis would be identified                                                             | Sinusitis    | Two EtD criteria reported:<br>1. Values<br>2. Resource use                                        |
| 28<br>29<br>30<br>31<br>32<br>33<br>34<br>35<br>36<br>37<br>38<br>39<br>40<br>41<br>42<br>43<br>44<br>45<br>46<br>47 | Morbidity and Mortality Weekly Report                  | 2009 | CDC, the National Institutes of Health, the HIV Medicine Association of the Infectious Diseases Society of America, the Pediatric Infectious Diseases Society, and the American Academy of Pediatrics | North America | These guidelines are intended for use by clinicians and other health-care workers providing medical care for HIV-exposed and HIV-infected children in the United States. | Tuberculosis | Had a scaled domain score of < 60%                                                                |



|                                                              |      |                                                                                                                                                               |               |                                                                                                                                                      |                              |                                               |
|--------------------------------------------------------------|------|---------------------------------------------------------------------------------------------------------------------------------------------------------------|---------------|------------------------------------------------------------------------------------------------------------------------------------------------------|------------------------------|-----------------------------------------------|
| Public Health Agency of Canada                               | 2014 | Association of Medical Micro- biology and Infectious Disease Canada (AMMI Canada)                                                                             | North America | Primary and secondary                                                                                                                                | Tuberculosis                 | Had a scaled domain score of < 60%            |
| BC Centre for Disease Control                                | 2014 | British Columbia Centre for Disease Control (BCCDC)                                                                                                           | North America | (Primary care) clinicians and public health professionals regarding care and treatment of STIs in British Columbia                                   | Gonorrhoea                   | Had a scaled domain score of < 60%            |
| Centres for Disease Control and Prevention                   | 2019 | Centers for Disease Control and Prevention, the National Institutes of Health, and the HIV Medicine Association of the Infectious Diseases Society of America | North America | Primary, secondary and tertiary                                                                                                                      | Tuberculosis                 | Had a scaled domain score of < 60%            |
| Infectious Disease Society of America (IDSA)                 | 2011 | Infectious Disease Society of America (IDSA)                                                                                                                  | North America | Secondary and tertiary                                                                                                                               | Community-acquired pneumonia | Had a scaled domain score of < 60%            |
| The National Institute for Health and Care Excellence (NICE) | 2018 | The National Institute for Health and Care Excellence (NICE)                                                                                                  | Europe        | Primary, secondary and tertiary (in primary, secondary or other care settings (for example walk-in-centres, urgent care, and minor ailment schemes)) | Pharyngitis                  | One EtD criteria reported:<br>1. Resource use |

|                                                              |      |                                                                                                                                                                                                     |               |                                                                                                                                                                                                             |                              |                                               |
|--------------------------------------------------------------|------|-----------------------------------------------------------------------------------------------------------------------------------------------------------------------------------------------------|---------------|-------------------------------------------------------------------------------------------------------------------------------------------------------------------------------------------------------------|------------------------------|-----------------------------------------------|
| World Health Organization (WHO)                              | 2016 | World Health Organization (WHO)                                                                                                                                                                     | International | low- and middle-income countries                                                                                                                                                                            | Tuberculosis                 | Recommendations do not consider resistance    |
| Public Health Agency of Canada (PHAC)                        | 2014 | Public Health Agency of Canada (PHAC)                                                                                                                                                               | North America | n/a                                                                                                                                                                                                         | Gonorrhoea                   | Had a scaled domain score of < 60%            |
| The National Institute for Health and Care Excellence (NICE) | 2019 | The National Institute for Health and Care Excellence (NICE)                                                                                                                                        | Europe        | Primary care settings (for example walk-in-centres, urgent care, and minor ailment schemes) either by prescription or by any other legal means of supply of medicine (for example patient group direction). | Community-acquired pneumonia | No EtD criteria reported                      |
| Centers for Disease Control and Prevention (CDC)             | 2013 | National Institutes of Health, Centers for Disease Control and Prevention, the HIV Medicine Association of the Infectious Diseases Society of America and the Pediatric Infectious Diseases Society | North America | Primary care; high-resource settings                                                                                                                                                                        | Tuberculosis                 | One EtD criteria reported:<br>1. Resource use |
| Ministry of Health Singapore                                 | 2016 | Ministry of Health, Singapore                                                                                                                                                                       | Asia          | (primary secondary and tertiary) various (all healthcare practitioners)                                                                                                                                     | Tuberculosis                 | Had a scaled domain score of < 60%            |

|                                                    |      |                                                                                                                                         |               |                                                                                           |                              |                                                                                  |
|----------------------------------------------------|------|-----------------------------------------------------------------------------------------------------------------------------------------|---------------|-------------------------------------------------------------------------------------------|------------------------------|----------------------------------------------------------------------------------|
| University of Michigan Health System               | 2013 | Michigan Medicine. University of Michigan                                                                                               | North America | Primary care                                                                              | Pharyngitis                  | Had a scaled domain score of < 60%                                               |
| AHRQ - Agency for Healthcare Research + Quality,   | 2008 | The National Institute for Health and Care Excellence (NICE); National Collaborating Centre for Women's and Children's Health (NCC-WCH) | Europe        | Primary care and secondary care setting (including both community and hospital settings). | Otitis media                 | Three EtD criteria reported:<br>1. Resource use<br>2. Acceptability<br>3. Equity |
| British Columbia Centre for Excellence in HIV/AIDS | 2015 | British Columbia Centre for Excellence in HIV/AIDS                                                                                      | North America | Primary care                                                                              | Tuberculosis                 | Had a scaled domain score of < 60%                                               |
| Kawaguchi, R. et al.                               | 2019 | Japan Society of Obstetrics and Gynecology (JSOG) and Japan Association of Obstetricians and Gynecologists (JAOG)                       | Asia          | Primary care (gynecological outpatient care.)                                             | Gonorrhoea                   | Recommendations do not consider resistance                                       |
| Mandell, L. A. et al.                              | 2007 | Infectious Disease Society of America (IDSA)                                                                                            | North America | Emergency medicine physicians, hospitalists, and primary care practitioners               | Community-acquired pneumonia | Had a scaled domain score of < 60%                                               |
| Public Health Ontario                              | 2018 | Public Health Ontario (PHO)                                                                                                             | North America | Primary care                                                                              | Gonorrhoea                   | Unable to provide supplementary materials                                        |
| Wiersinga, W. J. et al.                            | 2017 | The Dutch Working Party on Antibiotic Policy or Stichting                                                                               | Europe        | This guideline is meant for the treatment of adult patients who                           | Community-acquired pneumonia | Had a scaled domain score of < 60%                                               |

1  
2  
3  
4  
5  
6  
7  
8  
9  
10  
11  
12  
13  
14  
15  
16  
17  
18  
19  
20  
21  
22  
23  
24  
25  
26  
27  
28  
29  
30  
31  
32  
33  
34  
35  
36  
37  
38  
39  
40  
41  
42  
43  
44  
45  
46  
47

|                                     |      |                                                                                       |               |                                                                                                                                                                                                                                                                                                                          |                              |                                                           |
|-------------------------------------|------|---------------------------------------------------------------------------------------|---------------|--------------------------------------------------------------------------------------------------------------------------------------------------------------------------------------------------------------------------------------------------------------------------------------------------------------------------|------------------------------|-----------------------------------------------------------|
|                                     |      | Werkgroep Antibiotica Beleid (SWAB) and Dutch Association of Chest Physicians (NVALT) |               | present themselves at the hospital, and are treated as outpatients, as well as for hospitalized patients up to 72 hours after admission, and is in full accordance with the 2011 NHG practice guideline for GPs <sup>2</sup> . The given recommendations are applicable to adult patients with a CAP in the Netherlands. |                              |                                                           |
| U.S. Preventive Services Task Force | 2019 | United States Preventative Task Force (USPTF)                                         | North America | primary care                                                                                                                                                                                                                                                                                                             | Gonorrhoea                   | Two EtD criteria reported:<br>1. Feasibility<br>2. Equity |
| World Health Organization (WHO)     | 2012 | World Health Organization (WHO)                                                       | International | primary care & low- and middle-income countries                                                                                                                                                                                                                                                                          | Tuberculosis                 | Recommendations do not consider resistance                |
| Athlin, S. et al.                   | 2017 | The Swedish Society of Infectious Diseases                                            | Europe        | These guidelines apply to the in-hospital treatment of adult non-immunocompromised patients with CAP.                                                                                                                                                                                                                    | Community-acquired pneumonia | Had a scaled domain score of < 60%                        |
| Boyles, T. H. et al.                | 2017 | South African Thoracic Society (SATS) and the Federation of Infectious Diseases       | Africa        | Primary and secondary care                                                                                                                                                                                                                                                                                               | Community-acquired pneumonia | Had a scaled domain score of < 60%                        |

|                                                                                    |      |                                                                                                                                                                                                                                  |               |                                                                                                                                                                                                                                              |                                                                    |                                            |
|------------------------------------------------------------------------------------|------|----------------------------------------------------------------------------------------------------------------------------------------------------------------------------------------------------------------------------------|---------------|----------------------------------------------------------------------------------------------------------------------------------------------------------------------------------------------------------------------------------------------|--------------------------------------------------------------------|--------------------------------------------|
|                                                                                    |      | Societies of Southern Africa (FIDSSA).                                                                                                                                                                                           |               |                                                                                                                                                                                                                                              |                                                                    |                                            |
| Chaves NJ. et al.                                                                  | 2016 | The Australasian Society for Infectious Diseases (ASID)<br>National Tuberculosis Advisory Committee (NTAC) Royal Australasian College of Physicians (RACP)<br>The Australasian Chapter of Sexual Health Medicine (AChSHM – RACP) | Oceania       | Primary, secondary and tertiary intended for healthcare providers who care for people from refugee-like backgrounds, including general practitioners, refugee health nurses, refugee health specialists, Infectious Diseases (ID) physicians | Tuberculosis and gonorrhoea                                        | Had a scaled domain score of < 60%         |
| Chiappini, E. et al.                                                               | 2013 | Italian Society of Preventive and Social Pediatrics                                                                                                                                                                              | Europe        | Primary care (primary care pediatricians and general practice physicians)                                                                                                                                                                    | Pharyngitis; sinusitis; community acquired pneumonia; otitis media | Had a scaled domain score of < 60%         |
| Di Comite, A. et al.                                                               | 2016 | Italian Pediatric TB Study Group                                                                                                                                                                                                 | Europe        | primary and secondary care                                                                                                                                                                                                                   | Tuberculosis                                                       | Recommendations do not consider resistance |
| Jereb, J. A.;<br>Goldberg, S. V.;<br>Powell, K.;<br>Villarino, M. E.;<br>Lobue, P. | 2011 | Centre for Disease Control and Prevention (CDC)                                                                                                                                                                                  | North America | Primary and secondary care                                                                                                                                                                                                                   | Tuberculosis                                                       | Had a scaled domain score of < 60%         |
| Ricardo de Amorim Corrêa. et al.                                                   | 2009 | Scientific Board and Respiratory Infection Committee of the Brazilian Thoracic Association                                                                                                                                       | South America | Primary and secondary care                                                                                                                                                                                                                   | Community-acquired pneumonia                                       | Had a scaled domain score of < 60%         |

1  
2  
3  
4  
5  
6  
7  
8  
9  
10  
11  
12  
13  
14  
15  
16  
17  
18  
19  
20  
21  
22  
23  
24  
25  
26  
27  
28  
29  
30  
31  
32  
33  
34  
35  
36  
37  
38  
39  
40  
41  
42  
43  
44  
45  
46  
47

|                     |      |                                       |      |                            |                              |                                    |
|---------------------|------|---------------------------------------|------|----------------------------|------------------------------|------------------------------------|
| Z.A. Memish. et al. | 2007 | THE GCC CAP WORKING GROUP (GCC-CAPWG) | Asia | Primary and secondary care | Community-acquired pneumonia | Had a scaled domain score of < 60% |
|---------------------|------|---------------------------------------|------|----------------------------|------------------------------|------------------------------------|

Supplemental Table 5S: Number of GRADE Evidence to Decision Frameworks criteria reported in guidelines developed Internationally and regionally

| Author                                            | Guideline developer        | Year | Focus area   | Number of EtD criteria reported | Values       | Resource use | Acceptability | Feasibility  | Equity       |
|---------------------------------------------------|----------------------------|------|--------------|---------------------------------|--------------|--------------|---------------|--------------|--------------|
| Chow AWB et al.                                   | IDSA                       | 2012 | Sinusitis    | 1                               | Not reported | Reported     | Not reported  | Not reported | Not reported |
| Abdul Rahaman JAK et al.                          | Malaysian Family Physician | 2012 | Tuberculosis | 2                               | Reported     | Reported     | Not reported  | Not reported | Not reported |
| World Health Organization                         | WHO                        | 2014 | Tuberculosis | 3                               | Not reported | Reported     | Reported      | Reported     | Not reported |
| National Institute for Health and Care Excellence | NICE                       | 2016 | Tuberculosis | 4                               | Reported     | Reported     | Reported      | Reported     | Not reported |
| World Health Organization                         | WHO                        | 2019 | Tuberculosis | 5                               | Reported     | Reported     | Reported      | Reported     | Reported     |

|                                                                                     |                                                                                     |      |                              |   |              |              |              |              |              |              |    |    |    |    |    |    |    |    |    |    |    |    |    |    |    |    |    |    |    |    |    |    |    |    |    |    |    |    |    |    |    |    |    |    |    |    |
|-------------------------------------------------------------------------------------|-------------------------------------------------------------------------------------|------|------------------------------|---|--------------|--------------|--------------|--------------|--------------|--------------|----|----|----|----|----|----|----|----|----|----|----|----|----|----|----|----|----|----|----|----|----|----|----|----|----|----|----|----|----|----|----|----|----|----|----|----|
| 1                                                                                   | 2                                                                                   | 3    | 4                            | 5 | 6            | 7            | 8            | 9            | 10           | 11           | 12 | 13 | 14 | 15 | 16 | 17 | 18 | 19 | 20 | 21 | 22 | 23 | 24 | 25 | 26 | 27 | 28 | 29 | 30 | 31 | 32 | 33 | 34 | 35 | 36 | 37 | 38 | 39 | 40 | 41 | 42 | 43 | 44 | 45 | 46 | 47 |
| British Infection Association                                                       | British Thoracic Society                                                            | 2009 | Community-acquired pneumonia | 1 | Not reported | Reported     | Not reported | Not reported | Not reported | Not reported |    |    |    |    |    |    |    |    |    |    |    |    |    |    |    |    |    |    |    |    |    |    |    |    |    |    |    |    |    |    |    |    |    |    |    |    |
| Spanish Society for Epidemiology, Spanish Society of Primary Care, Physicians, etc. | Spanish Society for Epidemiology, Spanish Society of Primary Care, Physicians, etc. | 2010 | Tuberculosis                 | 3 | Reported     | Reported     | Not reported | Reported     | Not reported |              |    |    |    |    |    |    |    |    |    |    |    |    |    |    |    |    |    |    |    |    |    |    |    |    |    |    |    |    |    |    |    |    |    |    |    |    |
| American Academy of Pediatrics                                                      | American Academy of Pediatrics                                                      | 2013 | Otitis media                 | 2 | Reported     | Reported     | Not reported | Not reported | Not reported |              |    |    |    |    |    |    |    |    |    |    |    |    |    |    |    |    |    |    |    |    |    |    |    |    |    |    |    |    |    |    |    |    |    |    |    |    |
| National Institute for Health and Clinical Excellence                               | NICE                                                                                | 2014 | Community-acquired pneumonia | 2 | Reported     | Not reported | Not reported | Reported     | Not reported |              |    |    |    |    |    |    |    |    |    |    |    |    |    |    |    |    |    |    |    |    |    |    |    |    |    |    |    |    |    |    |    |    |    |    |    |    |
| World Health Organization                                                           | WHO                                                                                 | 2015 | Tuberculosis                 | 5 | Reported     | Reported     | Reported     | Reported     | Reported     |              |    |    |    |    |    |    |    |    |    |    |    |    |    |    |    |    |    |    |    |    |    |    |    |    |    |    |    |    |    |    |    |    |    |    |    |    |
| Richard M. Rosenfeld et al.                                                         | American Academy of Otolaryngology—Head and Neck                                    | 2015 | Sinusitis                    | 3 | Reported     | Reported     | Reported     | Not reported | Not reported |              |    |    |    |    |    |    |    |    |    |    |    |    |    |    |    |    |    |    |    |    |    |    |    |    |    |    |    |    |    |    |    |    |    |    |    |    |

1  
2  
3  
4  
5  
6  
7  
8  
9  
10  
11  
12  
13  
14  
15  
16  
17  
18  
19  
20  
21  
22  
23  
24  
25  
26  
27  
28  
29  
30  
31  
32  
33  
34  
35  
36  
37  
38  
39  
40  
41  
42  
43  
44  
45  
46  
47

|                                            |                                                                     |      |                           |   |              |              |              |              |              |
|--------------------------------------------|---------------------------------------------------------------------|------|---------------------------|---|--------------|--------------|--------------|--------------|--------------|
|                                            | Surgery Foundation                                                  |      |                           |   |              |              |              |              |              |
| World Health Organization                  | WHO                                                                 | 2015 | Tuberculosis              | 5 | Reported     | Reported     | Reported     | Reported     | Reported     |
| Richard M. Rosenfeld et al.                | American Academy of Otolaryngology—Head and Neck Surgery Foundation | 2016 | Otitis media              | 3 | Reported     | Reported     | Reported     | Not reported | Not reported |
| World Health Organization                  | WHO                                                                 | 2016 | Gonorrhoea                | 5 | Reported     | Reported     | Reported     | Reported     | Reported     |
| P. Nahid et al.                            | IDSA                                                                | 2016 | Tuberculosis              | 0 | Not reported |
| Institute for Clinical Systems Improvement | Institute for Clinical Systems Improvement                          | 2017 | Pharyngitis and sinusitis | 1 | Not reported | Reported     | Not reported | Not reported | Not reported |
| Stanford T. Shulman et al.                 | IDSA                                                                | 2012 | Pharyngitis               | 1 | Not reported | Reported     | Not reported | Not reported | Not reported |
| Ministry of Health Malaysia                | Ministry of Health Malaysia                                         | 2012 | Otitis media              | 0 | Not reported |



|                                                       |                                                                                                            |      |              |   |              |              |              |              |              |
|-------------------------------------------------------|------------------------------------------------------------------------------------------------------------|------|--------------|---|--------------|--------------|--------------|--------------|--------------|
| Heidemann CL et al.                                   | Danish Health and Medicines Authority and the Danish Society of Otorhinolaryngology, Head and Neck Surgery | 2016 | Otitis media | 0 | Not reported |
| The Scottish Intercollegiate Guidelines Network       | SIGN                                                                                                       | 2010 | Pharyngitis  | 2 | Reported     | Reported     | Not reported | Not reported | Not reported |
| World Health Organization                             | WHO                                                                                                        | 2011 | Tuberculosis | 4 | Reported     | Reported     | Reported     | Reported     | Not reported |
| Richard M. Rosenfeld et al.                           | American Academy of Otolaryngology                                                                         | 2015 | Sinusitis    | 2 | Reported     | Reported     | Not reported | Not reported | Not reported |
| World Health Organization                             | WHO                                                                                                        | 2018 | Tuberculosis | 5 | Reported     | Reported     | Reported     | Reported     | Reported     |
| World Health Organization                             | WHO                                                                                                        | 2012 | Otitis media | 4 | Reported     | Reported     | Reported     | Reported     | Not reported |
| The National Institute for Health and Care Excellence | NICE                                                                                                       | 2018 | Pharyngitis  | 1 | Not reported | Reported     | Not reported | Not reported | Not reported |

1  
2  
3  
4  
5  
6  
7  
8  
9  
10  
11  
12  
13  
14  
15  
16  
17  
18  
19  
20  
21  
22  
23  
24  
25  
26  
27  
28  
29  
30  
31  
32  
33  
34  
35  
36  
37  
38  
39  
40  
41  
42  
43  
44  
45  
46  
47

|                                                                                                                                  |               |      |                              |   |              |              |              |              |              |
|----------------------------------------------------------------------------------------------------------------------------------|---------------|------|------------------------------|---|--------------|--------------|--------------|--------------|--------------|
| The National Institute for Health and Care Excellence                                                                            | NICE          | 2019 | Community-acquired pneumonia | 0 | Not reported |
| National Institutes of Health, Centers for Disease Control and Prevention, et al.                                                | NIH, CDC      | 2013 | Tuberculosis                 | 1 | Not reported | Reported     | Not reported | Not reported | Not reported |
| The National Institute for Health and Care Excellence; National Collaborating Centre for Women's and Children's Health (NCC-WCH) | NICE, NCC-WCH | 2008 | Otitis media                 | 3 | Not reported | Reported     | Reported     | Not reported | Reported     |
| United States Preventative Task Force                                                                                            | USPTF         | 2019 | Gonorrhoea                   | 2 | Not reported | Not reported | Not reported | Reported     | Reported     |
