# Supplementary material for: Consideration of antimicrobial resistance and contextual factors in infectious disease guidelines: a systematic survey
Source: PubMed Central journal article supplement — BMJ Open. 2021 Jul 30;11(7):e046097. doi: 10.1136/bmjopen-2020-046097 (PMC8327810; doi:10.1136/bmjopen-2020-046097), 2021-07-30
Supplement: bmjopen-2020-046097supp001.pdf [file bmjopen-2020-046097supp001.pdf]

## Supplement

## Extra figures &amp; tables

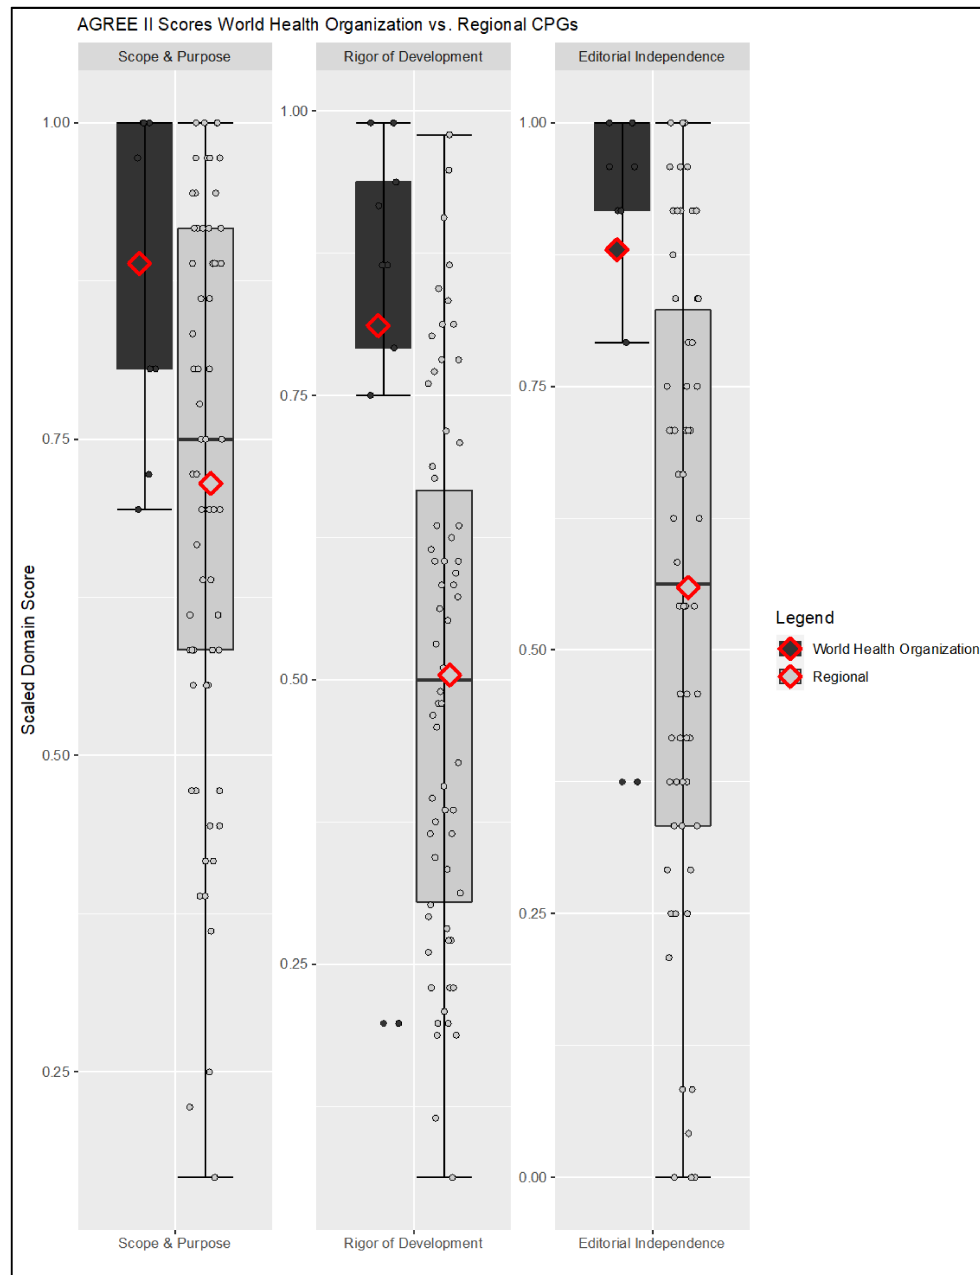

Figure 1S: Boxplot of AGREE II scores comparing World Health Organization and regional guidelines

AGREE II = Appraisal of Guidelines for Research & Evaluation II Instrument; Dark grey dots = World Health Organization guidelines; light grey dots = regional guidelines. Scope and purpose = domain one; rigor of development = domain three; editorial independence = domain six.

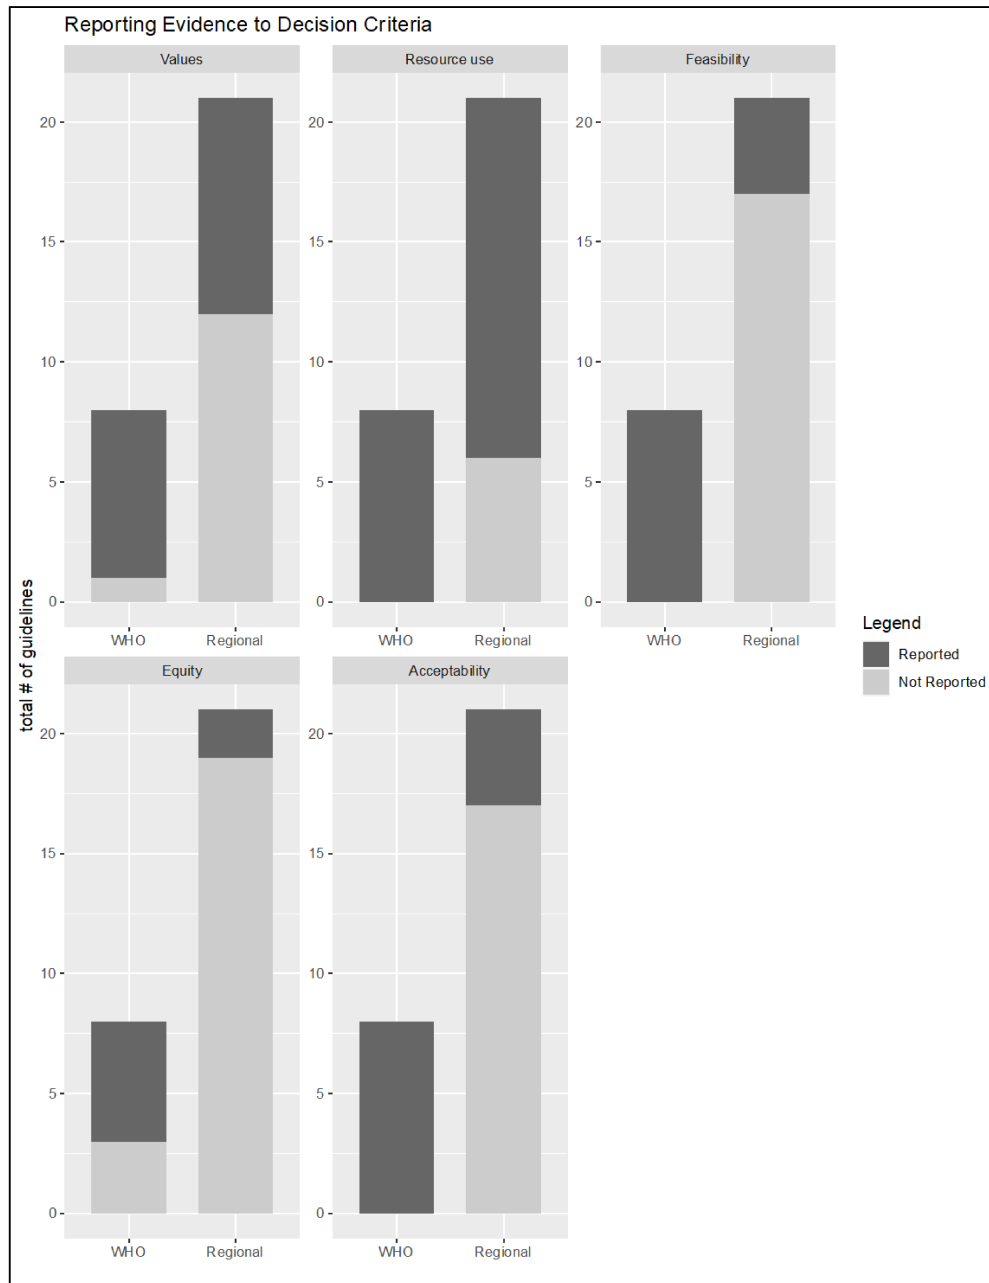

**Figure 2S: World Health Organization versus regional guidelines meeting AGREE II scores  $\geq 60\%$  reporting GRADE Evidence to Decision Frameworks**  
 29/75 guidelines with AMR considerations had a scaled domain score of  $\geq 60\%$ ; EtD criteria = evidence to decision criteria: values, resource use, feasibility, acceptability, and equity

Supplemental Table 1S: Research question in PICAR format

|                                                                 |                                                                                                                                                                                                                                                                                                                                                                                                                                                                                                                          |
|-----------------------------------------------------------------|--------------------------------------------------------------------------------------------------------------------------------------------------------------------------------------------------------------------------------------------------------------------------------------------------------------------------------------------------------------------------------------------------------------------------------------------------------------------------------------------------------------------------|
| <b>PICAR item</b>                                               |                                                                                                                                                                                                                                                                                                                                                                                                                                                                                                                          |
| <b>P: Population, clinical indications(s), and condition(s)</b> | 1) Tuberculosis; 2) Gonorrhoea; and 3) Respiratory tract infections: otitis media, pharyngitis, sinusitis, and community acquired pneumonia.                                                                                                                                                                                                                                                                                                                                                                             |
| <b>I: Intervention(s)</b>                                       | Any intervention that treats tuberculosis, gonorrhoea, and respiratory tract infections.                                                                                                                                                                                                                                                                                                                                                                                                                                 |
| <b>C: Comparator(s), Comparison(s), and (key) content</b>       | Any comparator.                                                                                                                                                                                                                                                                                                                                                                                                                                                                                                          |
| <b>A: Attributes of eligible guidelines</b>                     | <p><b>Publication year:</b> 2007 and above.</p> <p><b>Language of publication:</b> English.</p> <p><b>Scope: International and regional</b> guidelines.</p> <p><b>Purpose:</b> provide a recommendation on antibiotic selection and prescribing.</p> <p><b>Format:</b> any.</p> <p><b>Specific methodological standards:</b> guidelines that meet the AGREE II cut off score <math>\geq 60\%</math> in scope and purpose (domain one), rigor of development (domain three), and editorial independence (domain six).</p> |
| <b>R: Recommendation characteristics</b>                        | <p>At least one recommendation considers AMR.</p> <p><b>Location of recommendation:</b> anywhere within the guideline text, tables, and/or decision paths.</p>                                                                                                                                                                                                                                                                                                                                                           |

## Search strategy Ovid Medline and Embase

Database: Embase <1974 to 2019 June 07>, OVID Medline Epub Ahead of Print, In-Process & Other Non-Indexed Citations, Ovid MEDLINE(R) Daily and Ovid MEDLINE(R) 1946 to Present

## Search Strategy:

- 
- 1 (tuberculosis or tuberculous or TB).mp. (510746)
  - 2 (gonoc\* or gonorr\*).mp. (58460)
  - 3 pneumonia\*.mp. (557015)
  - 4 strepto\*.mp. (531324)
  - 5 (pneumonia\* adj2 strepto\*).mp. (83649)
  - 6 1 or 2 or 5 (648159)
  - 7 exp clinical pathway/ (14358)
  - 8 exp clinical protocol/ (252634)
  - 9 exp consensus/ (72535)
  - 10 exp consensus development conference/ (35258)
  - 11 exp consensus development conferences as topic/ (26540)
  - 12 critical pathways/ (14358)
  - 13 exp guideline/ (32021)
  - 14 guidelines as topic/ (375998)
  - 15 exp practice guideline/ (526549)
  - 16 practice guidelines as topic/ (381407)
  - 17 health planning guidelines/ (93323)
  - 18 (guideline or practice guideline or consensus development conference or consensus development conference, NIH).pt. (40981)
  - 19 (position statement\* or policy statement\* or practice parameter\* or best practice\*).ti,ab,kf,kw. (71605)
  - 20 (standards or guideline or guidelines).ti,kf,kw. (243012)
  - 21 ((practice or treatment\* or clinical) adj guideline\*).ab. (90132)
  - 22 (CPG or CPGs).ti. (12033)
  - 23 consensus\*.ti,kf,kw. (53111)
  - 24 consensus\*.ab. /freq=2 (52722)
  - 25 ((critical or clinical or practice) adj2 (path or paths or pathway or pathways or protocol\*).ti,ab,kf,kw. (47116)
  - 26 recommendat\*.ti,kf,kw. (85035)
  - 27 (care adj2 (standard or path or paths or pathway or pathways or map or maps or plan or plans)).ti,ab,kf,kw. (142098)
  - 28 (algorithm\* adj2 (screening or examination or test or tested or testing or assessment\* or diagnosis or diagnoses or diagnosed or diagnosing)).ti,ab,kf,kw. (16221)
  - 29 (algorithm\* adj2 (pharmacotherap\* or chemotherap\* or chemotreatment\* or therap\* or treatment\* or intervention\*).ti,ab,kf,kw. (22274)
  - 30 or/7-29 (1489076)
  - 31 6 and 30 (17406)
  - 32 limit 31 to yr="2007 -Current" (11340)
  - 33 (randomised or randomized or study or trial).ti. (3257255)
  - 34 32 not 33 (10455)
  - 35 limit 34 to (conference abstract or editorial or erratum or letter or tombstone or address or autobiography or biography or case reports or clinical trial, all or clinical trial protocol or clinical trial protocols as topic or clinical trial or comment or controlled clinical trial or interview or news or newspaper article or patient education handout or personal narrative or portrait or pragmatic clinical trial

or randomized controlled trial) [Limit not valid in Embase,Ovid MEDLINE(R),Ovid MEDLINE(R) Daily Update,Ovid MEDLINE(R) In-Process,Ovid MEDLINE(R) Publisher; records were retained] (2878)

36 34 not 35 (7577)

37 limit 36 to yr="2014 -Current" (3831)

38 limit 36 to yr="2007 - 2014" (4415)

39 remove duplicates from 38 (3464)

40 remove duplicates from 37 (2937)

41 39 or 40 (5910)

*Supplemental Table 2S: List of websites of organizations and associations that provide guidelines*

| International                                                                                                                                                                                                                                  | Canada                                                                                                                                                                                                                                     |
|------------------------------------------------------------------------------------------------------------------------------------------------------------------------------------------------------------------------------------------------|--------------------------------------------------------------------------------------------------------------------------------------------------------------------------------------------------------------------------------------------|
| The World Health Organization (WHO):<br><a href="https://www.who.int">https://www.who.int</a>                                                                                                                                                  | The Public Health Agency of Canada (PHAC):<br><a href="https://www.canada.ca/en/public-health.html">https://www.canada.ca/en/public-health.html</a>                                                                                        |
| The Centres for Disease Control and Prevention (CDC): <a href="https://www.cdc.gov">https://www.cdc.gov</a>                                                                                                                                    | Public Health Ontario (PHO):<br><a href="https://www.publichealthontario.ca">https://www.publichealthontario.ca</a>                                                                                                                        |
| The Scottish Intercollegiate Guidelines Network (SIGN): <a href="https://www.sign.ac.uk">https://www.sign.ac.uk</a>                                                                                                                            | Pan Canadian Public Health Network:<br><a href="http://www.phn-rsp.ca/index-eng.php">http://www.phn-rsp.ca/index-eng.php</a>                                                                                                               |
| The Robert Koch Institute (RKI):<br><a href="https://www.rki.de/EN/Home/homepage_node.html">https://www.rki.de/EN/Home/homepage_node.html</a>                                                                                                  | The Canadian Task Force on Preventative Health Care (CTFPHC): <a href="https://canadiantaskforce.ca">https://canadiantaskforce.ca</a>                                                                                                      |
| The National Institute for Health and Care Excellence (NICE): <a href="https://www.nice.org.uk">https://www.nice.org.uk</a>                                                                                                                    | The College of Physicians and Surgeons of Ontario (CPSO): <a href="https://www.cpsso.on.ca">https://www.cpsso.on.ca</a>                                                                                                                    |
| The European Centre for Disease Prevention and Control (ECDC):<br><a href="https://ecdc.europa.eu/en/home">https://ecdc.europa.eu/en/home</a>                                                                                                  | The Guidelines Advisory Committee (GAC):<br><a href="https://www.gacguidelines.ca">https://www.gacguidelines.ca</a>                                                                                                                        |
| The Australian Government National Health and Medical Research Council (NHMRC):<br><a href="https://www.nhmrc.gov.au">https://www.nhmrc.gov.au</a>                                                                                             | The Canadian Agency for Drugs and Technologies in Health (CADTH): <a href="https://www.cadth.ca">https://www.cadth.ca</a>                                                                                                                  |
| Australian Clinical Practice Guidelines:<br><a href="https://www.clinicalguidelines.gov.au">https://www.clinicalguidelines.gov.au</a>                                                                                                          | Association of Medical Microbiology of Infectious Disease Canada: <a href="https://www.ammi.ca">https://www.ammi.ca</a>                                                                                                                    |
| New Zealand Guidelines Group:<br><a href="https://www.health.govt.nz/about-ministry/ministry-health-websites/new-zealand-guidelines-group">https://www.health.govt.nz/about-ministry/ministry-health-websites/new-zealand-guidelines-group</a> | The Registered Nurses Association of Ontario's Best Practice Guidelines (NAOBPG):<br><a href="https://rnao.ca/bpg">https://rnao.ca/bpg</a>                                                                                                 |
| United States Preventative Services Task Force:<br><a href="https://www.uspreventiveservicestaskforce.org">https://www.uspreventiveservicestaskforce.org</a>                                                                                   | Canadian Paediatric Society: <a href="https://www.cps.ca">https://www.cps.ca</a>                                                                                                                                                           |
| Infectious Diseases Society of America:<br><a href="https://www.idsociety.org">https://www.idsociety.org</a>                                                                                                                                   | British Columbia (BC) Guidelines:<br><a href="https://www2.gov.bc.ca/gov/content/health/practitioner-professional-resources/bc-guidelines">https://www2.gov.bc.ca/gov/content/health/practitioner-professional-resources/bc-guidelines</a> |
| American Academy of Family Physicians<br><a href="https://www.aafp.org">https://www.aafp.org</a>                                                                                                                                               | British Columbia Centre for Disease Control (BCCDC): <a href="http://www.bccdc.ca">http://www.bccdc.ca</a>                                                                                                                                 |
| The American Thoracic Society (ATS):<br><a href="https://www.thoracic.org">https://www.thoracic.org</a>                                                                                                                                        | Towards Optimized Practice (TOP):<br><a href="http://www.topalbertadoctors.org/home/">http://www.topalbertadoctors.org/home/</a>                                                                                                           |
|                                                                                                                                                                                                                                                | Winnipeg Regional Health Authority (WHRA):<br><a href="http://www.wrha.mb.ca">http://www.wrha.mb.ca</a>                                                                                                                                    |

Supplemental Table 3S: Definition of recommendations that consider antibiotic resistance

| Recommendation                         | Definition                                                                                                                                                                                                                                                                                                                                                                                                                                                                                                                                                                                                                                                                                                                                                                                                                                                         | Example                                                                                                                                                                                                                                                                                                                                                                                                                                                                                                               |
|----------------------------------------|--------------------------------------------------------------------------------------------------------------------------------------------------------------------------------------------------------------------------------------------------------------------------------------------------------------------------------------------------------------------------------------------------------------------------------------------------------------------------------------------------------------------------------------------------------------------------------------------------------------------------------------------------------------------------------------------------------------------------------------------------------------------------------------------------------------------------------------------------------------------|-----------------------------------------------------------------------------------------------------------------------------------------------------------------------------------------------------------------------------------------------------------------------------------------------------------------------------------------------------------------------------------------------------------------------------------------------------------------------------------------------------------------------|
| Considers resistance if                | <p>1. The recommendation is for a <b>population</b> that is infected with a resistant organism (i.e. people with drug-resistant TB); <b>OR</b></p> <p>2. The recommendation is supported by <b>country-specific resistance patterns</b>;<sup>1</sup> <b>OR</b></p> <p>3. The recommendation question (or PICO question) that has resistance as an <b>outcome</b>. <b>OR</b></p> <p>The <b>outcome</b> may be any of the following:</p> <p>‘resistance’, ‘resistant’, ‘drug-resistance’, ‘antibiotic resistance’, ‘antimicrobial resistance’, ‘antimicrobial in vitro resistance’, ‘acquired drug-resistance’</p> <p>4. The recommendation is to prescribe narrow-spectrum antibiotics over broad-spectrum antibiotics. <b>OR</b></p> <p>5. A recommendation for no antibiotic prescription or back-up antibiotic prescription (i.e. watchful waiting approach)</p> | <p><b>Example: A recommendation that considers country-specific resistance, and has a resistance-related outcome.</b></p> <p>“In adults and adolescents with gonococcal oropharyngeal infections, the WHO STI guideline suggests dual therapy over single therapy...and suggests single therapy (<u>based on recent local resistance data confirming susceptibility to the antimicrobial</u>).”</p> <p>The PICO table that was provided has ‘<u>antimicrobial in vitro resistance</u>’ as an outcome.<sup>2</sup></p> |
| <b>DOES NOT</b> consider resistance if | <p>1. The recommendation is <b>NOT</b> for a population that is infected with a resistant organism. <b>AND</b></p> <p>2. The recommendation is <b>NOT</b> supported by country-specific resistant patterns. <b>AND</b></p> <p>3. The recommendation question (or PICO question) <b>DOES NOT</b> have any resistant outcomes. <b>AND</b></p> <p>4. Recommendation <b>DOES NOT</b> prescribe narrow-spectrum antibiotics. <b>AND</b></p>                                                                                                                                                                                                                                                                                                                                                                                                                             | <p><b>Example: A recommendation that is not intended for a population that is infected with a resistant organism, nor is it supported by country specific resistant patterns, nor does it have outcomes pertaining to resistance.</b></p> <p>The BASHH 2013 guidelines recommended that “ceftriaxone 500mg intramuscularly single dose followed by oral Doxycycline 100mg bd plus oral Metronidazole 400mg bd both for 12 weeks was recommended for children over the age of 12.”<sup>3</sup></p>                     |

<sup>1</sup> Informed by the Elias et al 2017.

<sup>2</sup> WHO guidelines for the Treatment of Neisseria gonorrhoeae. 2016.

<sup>3</sup> BASHH 2013 Management of gonorrhoea and pelvic inflammatory disease in children.

|  |                                                                                                          |                                                                                                                                                                                                                                     |
|--|----------------------------------------------------------------------------------------------------------|-------------------------------------------------------------------------------------------------------------------------------------------------------------------------------------------------------------------------------------|
|  | 5. There are no recommendations on no antibiotic nor back-up antibiotic or no watchful-waiting approach. | For this recommendation, neither the guideline nor the supplementary materials mention that they considered England's resistance patterns when developing the recommendation, nor were there any outcomes pertaining to resistance. |
|--|----------------------------------------------------------------------------------------------------------|-------------------------------------------------------------------------------------------------------------------------------------------------------------------------------------------------------------------------------------|



**Details to extract and record from the guidelines<sup>4</sup>:**

1. Type of source.
2. Organization.
3. Document title.
4. Website link
5. Reference
6. The date of publication of guidelines/recommendations.
7. Year of planned update of the guideline/recommendations and the systematic review.
8. Recommendation that considers AMR.
9. What type of evidence did the recommendation that considers resistance consider?
10. The recommendation focus (i.e. tuberculosis, gonorrhoea, or respiratory tract infections)
11. The guideline question matched to the recommendation.
12. The number of recommendations on antibiotic use that consider AMR in each guideline.
13. The direction of the recommendations: for or against, or others variations.
14. The strength of the recommendations.
15. Type of infection.
16. Setting: hospital or community (i.e. primary, secondary, and tertiary care settings, low- or high-income settings, etc.).
17. Target population (i.e. people with cephalosporin resistant *Neisseria gonorrhoeae*).
18. The systematic reviews that support the recommendation. This includes systematic review that supports the certainty of the effect, and the systematic review conducted for the values and preferences of patients, equity issues and applicability.
  - a. We will record the publication year.
  - b. The research questions in PICO format.
  - c. Risk of Bias assessment conducted.
  - d. Analysis method (i.e. meta-analysis).
  - e. Year of planned update.
19. Type of evidence summary methods (narrative, GRADE tables including the summary of findings (SoF) table, evidence profiles (EP) table, or other evidence tables).
  - a. Assessment of the certainty of the evidence for each outcome.

---

<sup>4</sup> Details are informed by GRADE-ADOLOPMENT paper, appendix 1, step 5.

20. EtD available.
21. Criteria that influence the strength and direction of the recommendations are available or summarized. This includes:
  - a. The problem and its importance;
  - b. The certainty of the evidence;
  - c. The values and preferences of patients. Are the patient's values and preferences described?: yes with search strategy available; yes – systematic review without search strategy, yes–narrative; no; other (specify).
  - d. The balance between health benefits, harms and burden;
  - e. The resources that are required. Is the cost effectiveness described?: yes–Cost-effectiveness analysis; yes–systematic review without search strategy; yes–narrative; no; other (specify).
  - f. The increase or decrease in equity; where there health inequity considerations?
  - g. Acceptability: are stakeholder acceptability to most it is to the users and the public described; and
  - h. The feasibility of the recommendation: is the feasibility described?
22. Reporting or describing the following EtD criteria (yes/no): values, resource use, acceptability, feasibility, equity.
  - a. How were they reported? Was the evidence buried within paragraphs, or easily found within the guideline through subheadings and tables?
  - b. Was values, resource use, acceptability feasibility, or equity considerations part of their methodology? If so, the guideline/supplementary material actually report values, resource use, acceptability, feasibility, and equity?
  - c. Type of evidence used to inform EtD criteria, i.e. research evidence or expert or expert opinion

Supplemental Table 4S: Characteristics of excluded studies

| Reference          | Publishing year | Guideline developer                                                                                                                                                                                                                                                                                                                                                                            | Continent     | Setting                            | Focus area                   | Reason for exclusion                          |
|--------------------|-----------------|------------------------------------------------------------------------------------------------------------------------------------------------------------------------------------------------------------------------------------------------------------------------------------------------------------------------------------------------------------------------------------------------|---------------|------------------------------------|------------------------------|-----------------------------------------------|
| Gupta, D. et al.   | 2012            | Indian Chest Society and National College of Chest Physicians                                                                                                                                                                                                                                                                                                                                  | Asia          | Secondary and tertiary             | Community-acquired pneumonia | Had a scaled domain score of < 60%            |
| Chow, A. et al.    | 2012            | Infectious Disease Society of America (IDSA)                                                                                                                                                                                                                                                                                                                                                   | North America | Community and emergency department | Sinusitis                    | One EtD criteria reported:<br>1. Resource use |
| Bignell, C. et al. | 2013            | The European Branch of the International Union against Sexually Transmitted Infections (IUSTI Europe); the European Academy of Dermatology and Venereology (EADV); the European Dermatology Forum (EDF); the Union of European Medical Specialists (UEMS). The European Centre for Disease Prevention and Control (ECDC) and the European Office of the World Health Organization (WHO-Europe) | Europe        | Primary care                       | Gonorrhoea                   | Had a scaled domain score of < 60%            |

|                                                  |      |                                                                                                                                           |               |                                      |                              |                                    |
|--------------------------------------------------|------|-------------------------------------------------------------------------------------------------------------------------------------------|---------------|--------------------------------------|------------------------------|------------------------------------|
| Centres for Disease Control and Prevention (CDC) | 2013 | Centre for Disease Control and Prevention (CDC)                                                                                           | North America | Secondary and tertiary               | Tuberculosis                 | Had a scaled domain score of < 60% |
| Wald, E. R. et al.                               | 2013 | American Academy of Pediatrics                                                                                                            | North America | Primary, secondary and tertiary care | Sinusitis                    | Had a scaled domain score of < 60% |
| Bignell, C.; Fitzgerald, M.                      | 2011 | British Association for Sexual Health and HIV (BASHH)                                                                                     | Europe        | Tertiary care                        | Gonorrhoea                   | Had a scaled domain score of < 60% |
| Harris, M.                                       | 2011 | British Thoracic Society                                                                                                                  | Europe        | Primary and secondary care           | Community-acquired pneumonia | Had a scaled domain score of < 60% |
| Migliori, G. B. et al.                           | 2012 | European Centre for Disease Prevention and Control (ECDC) and the European Respiratory Society (ERS)                                      | Europe        | Secondary and tertiary care          | Tuberculosis                 | Had a scaled domain score of < 60% |
| Workowski, K. A.; Bolan, G. A.                   | 2015 | Centre for Disease Control and Prevention (CDC)                                                                                           | North America | Primary, secondary and tertiary care | Gonorrhoea                   | Had a scaled domain score of < 60% |
| Woodhead, M.;                                    | 2011 | European Respiratory Society (ERS), in collaboration with The European Society for Clinical Microbiology and Infectious Diseases (ESCMID) | Europe        | Primary, secondary and tertiary care | Community-acquired pneumonia | Had a scaled domain score of < 60% |
| Spindler, C. et al.                              | 2012 | Swedish Society of Infectious                                                                                                             | Europe        | Secondary care                       | Community-acquired pneumonia | Had a scaled domain score of < 60% |

|                                                                         |      |                                                              |               |                                                                                                                                  |              |                                                                                                   |
|-------------------------------------------------------------------------|------|--------------------------------------------------------------|---------------|----------------------------------------------------------------------------------------------------------------------------------|--------------|---------------------------------------------------------------------------------------------------|
| Desrosiers, M et al.                                                    | 2011 | Canadian Society of Otolaryngology-Head and Neck Surgery     | North America | Primary and secondary care                                                                                                       | Sinusitis    | Had a scaled domain score of < 60%                                                                |
| Mayor, M. T.; Roett, M. A.; Uduhiri, K. A.                              | 2012 | American Academy of Family Physicians                        | North America | Primary care                                                                                                                     | Gonorrhoea   | Had a scaled domain score of < 60%                                                                |
| Thwaites, G.                                                            | 2009 | British Infection Society Guidelines                         | Europe        | Secondary and tertiary                                                                                                           | Tuberculosis | Had a scaled domain score of < 60%                                                                |
| Bignell, C.; Iusti/Who,                                                 | 2009 | IUSTI/WHO                                                    | Europe        | Secondary and tertiary                                                                                                           | Gonorrhoea   | Had a scaled domain score of < 60%                                                                |
| Abdul Rahaman, J. A.; Ker, H. B.; Yusof, M.; Hanafi, N. S.; Wong, J. L. | 2012 | Malaysian Family Physician                                   | Asia          | Primary care but it should also be useful to those in the secondary/tertiary care.                                               | Tuberculosis | Two EtD criteria reported:<br>1. Values<br>2. Resource use                                        |
| World Health Organization (WHO)                                         | 2014 | World Health Organization (WHO)                              | International | This document is targeted at national TB programmes, paediatricians and other health workers in low- and middle-income countries | Tuberculosis | Three EtD criteria reported:<br>1. Resource use<br>2. Acceptability<br>3. Feasibility             |
| National Institute for Health and Care Excellence (NICE)                | 2016 | The National Institute for Health and Care Excellence (NICE) | Europe        | Primary, secondary and tertiary                                                                                                  | Tuberculosis | Four EtD criteria reported:<br>1. Values<br>2. Resource use<br>3. Acceptability<br>4. Feasibility |

|                                                                                                               |      |                                                                                                                                          |               |                                                          |                                            |                                                                                |
|---------------------------------------------------------------------------------------------------------------|------|------------------------------------------------------------------------------------------------------------------------------------------|---------------|----------------------------------------------------------|--------------------------------------------|--------------------------------------------------------------------------------|
| Menendez, R. et al.                                                                                           | 2010 | Spanish Society of Pulmonology and Thoracic Surgery (SEPAR)                                                                              | Europe        | n/a                                                      | Community-acquired pneumonia               | Had a scaled domain score of < 60%                                             |
| Kaplan, J. E.; Benson, C.; Holmes, K. H.; Brooks, J. T.; Pau, A.; Masur, H.                                   | 2009 | Centre for Disease Control and Prevention (CDC)                                                                                          | North America | Primary, secondary and tertiary settings; high-resource  | Tuberculosis and CAP                       | Had a scaled domain score of < 60%                                             |
| World Health Organization (WHO)                                                                               | 2007 | World Health Organization (WHO)                                                                                                          | International | Resource constraint primary, secondary and tertiary care | Tuberculosis                               | Had a scaled domain score of < 60%                                             |
| National Institute for Health and Care Excellence (NICE)                                                      | 2008 | The National Institute for Health and Care Excellence (NICE)                                                                             | Europe        | Primary care                                             | Otitis media, rhino sinusitis, pharyngitis | Had a scaled domain score of < 60%                                             |
| British Thoracic Society                                                                                      | 2009 | British Thoracic Society                                                                                                                 | Europe        | Primary, secondary and tertiary care                     | Community-acquired pneumonia               | One EtD criteria reported:<br>1. Resource use                                  |
| Spanish Society for Epidemiology; Spanish Society of Primary Care Physicians; Spanish Society for Pulmonology | 2010 | Spanish Society for Epidemiology; Spanish Society of Primary Care Physicians; Spanish Society for Pulmonology and Thoracic Surgery, etc. | Europe        | Primary care                                             | Tuberculosis                               | Three EtD criteria reported:<br>1. Values<br>2. Resource use<br>3. Feasibility |

|                                                              |      |                                                                     |               |                                                                                                                                                                                                                            |                              |                                                                                  |
|--------------------------------------------------------------|------|---------------------------------------------------------------------|---------------|----------------------------------------------------------------------------------------------------------------------------------------------------------------------------------------------------------------------------|------------------------------|----------------------------------------------------------------------------------|
| and Thoracic Surgery, etc.                                   |      |                                                                     |               |                                                                                                                                                                                                                            |                              |                                                                                  |
| Infectious Disease Society of America (IDSA)                 | 2011 | Infectious Disease Society of America (IDSA)                        | North America | Primary, secondary and tertiary care                                                                                                                                                                                       | Community-acquired pneumonia | Had a scaled domain score of < 60%                                               |
| American Academy of Family Physicians                        | 2013 | American Academy of Pediatrics                                      | North America | Primary care                                                                                                                                                                                                               | Otitis media                 | Two EtD criteria reported:<br>1. Values<br>2. Resource use                       |
| National Institute for Health and Clinical Excellence (NICE) | 2014 | The National Institute for Health and Care Excellence (NICE)        | Europe        | Primary, secondary and tertiary                                                                                                                                                                                            | Community-acquired pneumonia | Two EtD criteria reported:<br>1. Values<br>2. Feasibility                        |
| American Academy of Otolaryngology                           | 2015 | American Academy of Otolaryngology—Head and Neck Surgery Foundation | North America | The guideline is intended for all clinicians who are likely to diagnose and manage adults with rhinosinusitis and applies to any setting in which an adult with rhinosinusitis would be identified, monitored, or managed. | Sinusitis                    | Three EtD criteria reported:<br>1. Values<br>2. Resource use<br>3. Acceptability |
| American Academy of Otolaryngology                           | 2016 | American Academy of Otolaryngology—Head and Neck                    | North America | Primary care                                                                                                                                                                                                               | Otitis media                 | Three EtD criteria reported:                                                     |

|                                                              |      |                                                                                                       |               |                                                                                                                                                                                                                                                                                                                      |                           |                                                  |
|--------------------------------------------------------------|------|-------------------------------------------------------------------------------------------------------|---------------|----------------------------------------------------------------------------------------------------------------------------------------------------------------------------------------------------------------------------------------------------------------------------------------------------------------------|---------------------------|--------------------------------------------------|
|                                                              |      | Surgery Foundation, the American Academy of Pediatrics, and the American Academy of Family Physicians |               |                                                                                                                                                                                                                                                                                                                      |                           | 1. Values<br>2. Resource use<br>3. Acceptability |
| Infectious Disease Society of America (IDSA)                 | 2016 | Infectious Disease Society of America (IDSA)                                                          | North America | well-resourced; low-incidence settings                                                                                                                                                                                                                                                                               | Tuberculosis              | No EtD reported                                  |
| The National Institute for Health and Care Excellence (NICE) | 2017 | The National Institute for Health and Care Excellence (NICE)                                          | Europe        | Primary, secondary and tertiary care                                                                                                                                                                                                                                                                                 | Sinusitis                 | Had a scaled domain score of < 60%               |
| Institute for Clinical Systems Improvement                   | 2017 | Institute for Clinical Systems Improvement                                                            | North America | ambulatory care                                                                                                                                                                                                                                                                                                      | Pharyngitis and sinusitis | One EtD criteria reported:<br>1. Resource use    |
| The National Institute for Health and Care Excellence (NICE) | 2018 | The National Institute for Health and Care Excellence (NICE)                                          | Europe        | Primary and secondary care (For the treatment of acute uncomplicated otitis media in primary, secondary or other care settings (for example walk-in-centres, urgent care, and minor ailment schemes) either by prescription or by any other legal means of supply of medicine (for example Patient Group Direction). | Otitis media              | Had a scaled domain score of < 60%               |



|                                                                                |      |                                                                                                     |               |                                                                                                                                                                                    |                              |                                               |
|--------------------------------------------------------------------------------|------|-----------------------------------------------------------------------------------------------------|---------------|------------------------------------------------------------------------------------------------------------------------------------------------------------------------------------|------------------------------|-----------------------------------------------|
| British Association for Sexual Health and HIV                                  | 2019 | British Association for Sexual Health and HIV (BASHH)                                               | Europe        | The guidelines are primarily aimed at level 3 sexual health services within the United Kingdom (UK) although the principles of the recommendations could be adopted at all levels. | Gonorrhoea                   | Had a scaled domain score of < 60%            |
| Ministry of Public Health/Qatar                                                | 2016 | Ministry of Public Health of Qatar (MOPH)                                                           | Asia          | primary care and secondary care settings                                                                                                                                           | Community-acquired pneumonia | Had a scaled domain score of < 60%            |
| Infectious Disease Society of America (IDSA)                                   | 2012 | Infectious Disease Society of America (IDSA)                                                        | North America | healthcare providers who care for adult and pediatric patients with group A streptococcal pharyngitis                                                                              | Pharyngitis                  | One EtD criteria reported:<br>1. Resource use |
| Ministry of Health Malaysia<br>Ministry of Higher Education and private sector | 2012 | Ministry of Health Malaysia<br>Ministry of Higher Education and private sector                      | Asia          | Outpatient, inpatient and community setting                                                                                                                                        | Otitis media                 | No EtD criteria reported                      |
| Borisov, A. S et al.                                                           | 2018 | Centre for Disease Control and Prevention (CDC)                                                     | North America | n/a                                                                                                                                                                                | Tuberculosis                 | Had a scaled domain score of < 60%            |
| Lee, M. S. et al.                                                              | 2018 | the Korean Society for Chemotherapy, the Korean Society of Infectious Diseases the Korea Academy of | Asia          | Primary care                                                                                                                                                                       | Community-acquired pneumonia | Had a scaled domain score of < 60%            |

|                       |      |                                                                                                                                                                                                                |               |                     |              |                                    |
|-----------------------|------|----------------------------------------------------------------------------------------------------------------------------------------------------------------------------------------------------------------|---------------|---------------------|--------------|------------------------------------|
|                       |      | Tuberculosis and Respiratory Diseases, the Korean Association of Family Medicine, the Korean Medical Practitioners Association, and the National Evidence-based Healthcare Collaborating Agency                |               |                     |              |                                    |
| Pogany, L. et al.     | 2015 | Canadian Family Physician                                                                                                                                                                                      | North America | Primary care        | Gonorrhoea   | Had a scaled domain score of < 60% |
| Stahl, J. P. et al.   | 2017 | French Infectious Diseases Society (French acronym SPILF); National educational association for teaching therapeutics (French acronym APNET); French Society of Internal Medicine (French acronym SNFMI), etc. | Europe        | n/a                 | Tuberculosis | Had a scaled domain score of < 60% |
| Heidemann, CH. et al. | 2016 | Danish Health and Medicines Authority and the Danish Society of Otorhinolaryngology, Head and Neck Surgery                                                                                                     | Europe        | primary health care | Otitis media | No EtD criteria reported           |

|                                                        |      |                                                                                                                                                                                                       |               |                                                                                                                                                                          |              |                                                                                                   |
|--------------------------------------------------------|------|-------------------------------------------------------------------------------------------------------------------------------------------------------------------------------------------------------|---------------|--------------------------------------------------------------------------------------------------------------------------------------------------------------------------|--------------|---------------------------------------------------------------------------------------------------|
| The Scottish Intercollegiate Guidelines Network (SIGN) | 2010 | The Scottish Intercollegiate Guidelines Network (SIGN)                                                                                                                                                | Europe        | Primary and secondary (general practitioners, nurses, paediatricians, pharmacists, otolaryngologists, anaesthetists, public health specialists)                          | Pharyngitis  | Two EtD criteria reported:<br>1. Values<br>2. Resource use                                        |
| World Health Organization (WHO)                        | 2011 | World Health Organization (WHO)                                                                                                                                                                       | International | Resource constrained settings                                                                                                                                            | Tuberculosis | Four EtD criteria reported:<br>1. Values<br>2. Resource use<br>3. Acceptability<br>4. Feasibility |
| American Academy of Otolaryngology                     | 2015 | American Academy of Otolaryngology                                                                                                                                                                    | North America | (Primary, secondary and tertiary care) any setting in which an adult with rhinosinusitis would be identified                                                             | Sinusitis    | Two EtD criteria reported:<br>1. Values<br>2. Resource use                                        |
| Morbidity and Mortality Weekly Report                  | 2009 | CDC, the National Institutes of Health, the HIV Medicine Association of the Infectious Diseases Society of America, the Pediatric Infectious Diseases Society, and the American Academy of Pediatrics | North America | These guidelines are intended for use by clinicians and other health-care workers providing medical care for HIV-exposed and HIV-infected children in the United States. | Tuberculosis | Had a scaled domain score of < 60%                                                                |

|                                                              |      |                                                                                                                                                               |               |                                                                                                                                                      |                              |                                               |
|--------------------------------------------------------------|------|---------------------------------------------------------------------------------------------------------------------------------------------------------------|---------------|------------------------------------------------------------------------------------------------------------------------------------------------------|------------------------------|-----------------------------------------------|
| Public Health Agency of Canada                               | 2014 | Association of Medical Micro- biology and Infectious Disease Canada (AMMI Canada)                                                                             | North America | Primary and secondary                                                                                                                                | Tuberculosis                 | Had a scaled domain score of < 60%            |
| BC Centre for Disease Control                                | 2014 | British Columbia Centre for Disease Control (BCCDC)                                                                                                           | North America | (Primary care) clinicians and public health professionals regarding care and treatment of STIs in British Columbia                                   | Gonorrhoea                   | Had a scaled domain score of < 60%            |
| Centres for Disease Control and Prevention                   | 2019 | Centers for Disease Control and Prevention, the National Institutes of Health, and the HIV Medicine Association of the Infectious Diseases Society of America | North America | Primary, secondary and tertiary                                                                                                                      | Tuberculosis                 | Had a scaled domain score of < 60%            |
| Infectious Disease Society of America (IDSA)                 | 2011 | Infectious Disease Society of America (IDSA)                                                                                                                  | North America | Secondary and tertiary                                                                                                                               | Community-acquired pneumonia | Had a scaled domain score of < 60%            |
| The National Institute for Health and Care Excellence (NICE) | 2018 | The National Institute for Health and Care Excellence (NICE)                                                                                                  | Europe        | Primary, secondary and tertiary (in primary, secondary or other care settings (for example walk-in-centres, urgent care, and minor ailment schemes)) | Pharyngitis                  | One EtD criteria reported:<br>1. Resource use |

|                                                              |      |                                                                                                                                                                                                     |               |                                                                                                                                                                                                             |                              |                                               |
|--------------------------------------------------------------|------|-----------------------------------------------------------------------------------------------------------------------------------------------------------------------------------------------------|---------------|-------------------------------------------------------------------------------------------------------------------------------------------------------------------------------------------------------------|------------------------------|-----------------------------------------------|
| World Health Organization (WHO)                              | 2016 | World Health Organization (WHO)                                                                                                                                                                     | International | low- and middle-income countries                                                                                                                                                                            | Tuberculosis                 | Recommendations do not consider resistance    |
| Public Health Agency of Canada (PHAC)                        | 2014 | Public Health Agency of Canada (PHAC)                                                                                                                                                               | North America | n/a                                                                                                                                                                                                         | Gonorrhoea                   | Had a scaled domain score of < 60%            |
| The National Institute for Health and Care Excellence (NICE) | 2019 | The National Institute for Health and Care Excellence (NICE)                                                                                                                                        | Europe        | Primary care settings (for example walk-in-centres, urgent care, and minor ailment schemes) either by prescription or by any other legal means of supply of medicine (for example patient group direction). | Community-acquired pneumonia | No EtD criteria reported                      |
| Centers for Disease Control and Prevention (CDC)             | 2013 | National Institutes of Health, Centers for Disease Control and Prevention, the HIV Medicine Association of the Infectious Diseases Society of America and the Pediatric Infectious Diseases Society | North America | Primary care; high-resource settings                                                                                                                                                                        | Tuberculosis                 | One EtD criteria reported:<br>1. Resource use |
| Ministry of Health Singapore                                 | 2016 | Ministry of Health, Singapore                                                                                                                                                                       | Asia          | (primary secondary and tertiary) various (all healthcare practitioners)                                                                                                                                     | Tuberculosis                 | Had a scaled domain score of < 60%            |

|                                                    |      |                                                                                                                                         |               |                                                                                           |                              |                                                                                  |
|----------------------------------------------------|------|-----------------------------------------------------------------------------------------------------------------------------------------|---------------|-------------------------------------------------------------------------------------------|------------------------------|----------------------------------------------------------------------------------|
| University of Michigan Health System               | 2013 | Michigan Medicine. University of Michigan                                                                                               | North America | Primary care                                                                              | Pharyngitis                  | Had a scaled domain score of < 60%                                               |
| AHRQ - Agency for Healthcare Research + Quality,   | 2008 | The National Institute for Health and Care Excellence (NICE); National Collaborating Centre for Women's and Children's Health (NCC-WCH) | Europe        | Primary care and secondary care setting (including both community and hospital settings). | Otitis media                 | Three EtD criteria reported:<br>1. Resource use<br>2. Acceptability<br>3. Equity |
| British Columbia Centre for Excellence in HIV/AIDS | 2015 | British Columbia Centre for Excellence in HIV/AIDS                                                                                      | North America | Primary care                                                                              | Tuberculosis                 | Had a scaled domain score of < 60%                                               |
| Kawaguchi, R. et al.                               | 2019 | Japan Society of Obstetrics and Gynecology (JSOG) and Japan Association of Obstetricians and Gynecologists (JAOG)                       | Asia          | Primary care (gynecological outpatient care.)                                             | Gonorrhoea                   | Recommendations do not consider resistance                                       |
| Mandell, L. A. et al.                              | 2007 | Infectious Disease Society of America (IDSA)                                                                                            | North America | Emergency medicine physicians, hospitalists, and primary care practitioners               | Community-acquired pneumonia | Had a scaled domain score of < 60%                                               |
| Public Health Ontario                              | 2018 | Public Health Ontario (PHO)                                                                                                             | North America | Primary care                                                                              | Gonorrhoea                   | Unable to provide supplementary materials                                        |
| Wiersinga, W. J. et al.                            | 2017 | The Dutch Working Party on Antibiotic Policy or Stichting                                                                               | Europe        | This guideline is meant for the treatment of adult patients who                           | Community-acquired pneumonia | Had a scaled domain score of < 60%                                               |

|                                     |      |                                                                                       |               |                                                                                                                                                                                                                                                                                                                          |                              |                                                           |
|-------------------------------------|------|---------------------------------------------------------------------------------------|---------------|--------------------------------------------------------------------------------------------------------------------------------------------------------------------------------------------------------------------------------------------------------------------------------------------------------------------------|------------------------------|-----------------------------------------------------------|
|                                     |      | Werkgroep Antibiotica Beleid (SWAB) and Dutch Association of Chest Physicians (NVALT) |               | present themselves at the hospital, and are treated as outpatients, as well as for hospitalized patients up to 72 hours after admission, and is in full accordance with the 2011 NHG practice guideline for GPs <sup>2</sup> . The given recommendations are applicable to adult patients with a CAP in the Netherlands. |                              |                                                           |
| U.S. Preventive Services Task Force | 2019 | United States Preventative Task Force (USPTF)                                         | North America | primary care                                                                                                                                                                                                                                                                                                             | Gonorrhoea                   | Two EtD criteria reported:<br>1. Feasibility<br>2. Equity |
| World Health Organization (WHO)     | 2012 | World Health Organization (WHO)                                                       | International | primary care & low- and middle-income countries                                                                                                                                                                                                                                                                          | Tuberculosis                 | Recommendations do not consider resistance                |
| Athlin, S. et al.                   | 2017 | The Swedish Society of Infectious Diseases                                            | Europe        | These guidelines apply to the in-hospital treatment of adult non-immunocompromised patients with CAP.                                                                                                                                                                                                                    | Community-acquired pneumonia | Had a scaled domain score of < 60%                        |
| Boyles, T. H. et al.                | 2017 | South African Thoracic Society (SATS) and the Federation of Infectious Diseases       | Africa        | Primary and secondary care                                                                                                                                                                                                                                                                                               | Community-acquired pneumonia | Had a scaled domain score of < 60%                        |

|                                                                                    |      |                                                                                                                                                                                                                                     |               |                                                                                                                                                                                                                                              |                                                                    |                                            |
|------------------------------------------------------------------------------------|------|-------------------------------------------------------------------------------------------------------------------------------------------------------------------------------------------------------------------------------------|---------------|----------------------------------------------------------------------------------------------------------------------------------------------------------------------------------------------------------------------------------------------|--------------------------------------------------------------------|--------------------------------------------|
|                                                                                    |      | Societies of Southern Africa (FIDSSA).                                                                                                                                                                                              |               |                                                                                                                                                                                                                                              |                                                                    |                                            |
| Chaves NJ. et al.                                                                  | 2016 | The Australasian Society for Infectious Diseases (ASID)<br>National Tuberculosis Advisory Committee (NTAC)<br>Royal Australasian College of Physicians (RACP)<br>The Australasian Chapter of Sexual Health Medicine (AChSHM – RACP) | Oceania       | Primary, secondary and tertiary intended for healthcare providers who care for people from refugee-like backgrounds, including general practitioners, refugee health nurses, refugee health specialists, Infectious Diseases (ID) physicians | Tuberculosis and gonorrhoea                                        | Had a scaled domain score of < 60%         |
| Chiappini, E. et al.                                                               | 2013 | Italian Society of Preventive and Social Pediatrics                                                                                                                                                                                 | Europe        | Primary care (primary care pediatricians and general practice physicians)                                                                                                                                                                    | Pharyngitis; sinusitis; community acquired pneumonia; otitis media | Had a scaled domain score of < 60%         |
| Di Comite, A. et al.                                                               | 2016 | Italian Pediatric TB Study Group                                                                                                                                                                                                    | Europe        | primary and secondary care                                                                                                                                                                                                                   | Tuberculosis                                                       | Recommendations do not consider resistance |
| Jereb, J. A.;<br>Goldberg, S. V.;<br>Powell, K.;<br>Villarino, M. E.;<br>Lobue, P. | 2011 | Centre for Disease Control and Prevention (CDC)                                                                                                                                                                                     | North America | Primary and secondary care                                                                                                                                                                                                                   | Tuberculosis                                                       | Had a scaled domain score of < 60%         |
| Ricardo de Amorim Corrêa. et al.                                                   | 2009 | Scientific Board and Respiratory Infection Committee of the Brazilian Thoracic Association                                                                                                                                          | South America | Primary and secondary care                                                                                                                                                                                                                   | Community-acquired pneumonia                                       | Had a scaled domain score of < 60%         |



|                     |      |                                       |      |                            |                              |                                    |
|---------------------|------|---------------------------------------|------|----------------------------|------------------------------|------------------------------------|
| Z.A. Memish. et al. | 2007 | THE GCC CAP WORKING GROUP (GCC-CAPWG) | Asia | Primary and secondary care | Community-acquired pneumonia | Had a scaled domain score of < 60% |
|---------------------|------|---------------------------------------|------|----------------------------|------------------------------|------------------------------------|

*Supplemental Table 5S: Number of GRADE Evidence to Decision Frameworks criteria reported in guidelines developed Internationally and regionally*

| Author                                            | Guideline developer        | Year | Focus area   | Number of EtD criteria reported | Values       | Resource use | Acceptability | Feasibility  | Equity       |
|---------------------------------------------------|----------------------------|------|--------------|---------------------------------|--------------|--------------|---------------|--------------|--------------|
| Chow AWB et al.                                   | IDSA                       | 2012 | Sinusitis    | 1                               | Not reported | Reported     | Not reported  | Not reported | Not reported |
| Abdul Rahaman JAK et al.                          | Malaysian Family Physician | 2012 | Tuberculosis | 2                               | Reported     | Reported     | Not reported  | Not reported | Not reported |
| World Health Organization                         | WHO                        | 2014 | Tuberculosis | 3                               | Not reported | Reported     | Reported      | Reported     | Not reported |
| National Institute for Health and Care Excellence | NICE                       | 2016 | Tuberculosis | 4                               | Reported     | Reported     | Reported      | Reported     | Not reported |
| World Health Organization                         | WHO                        | 2019 | Tuberculosis | 5                               | Reported     | Reported     | Reported      | Reported     | Reported     |

|                                                                                     |                                                                                     |      |                              |   |              |              |              |              |              |
|-------------------------------------------------------------------------------------|-------------------------------------------------------------------------------------|------|------------------------------|---|--------------|--------------|--------------|--------------|--------------|
| British Infection Association                                                       | British Thoracic Society                                                            | 2009 | Community-acquired pneumonia | 1 | Not reported | Reported     | Not reported | Not reported | Not reported |
| Spanish Society for Epidemiology, Spanish Society of Primary Care, Physicians, etc. | Spanish Society for Epidemiology, Spanish Society of Primary Care, Physicians, etc. | 2010 | Tuberculosis                 | 3 | Reported     | Reported     | Not reported | Reported     | Not reported |
| American Academy of Pediatrics                                                      | American Academy of Pediatrics                                                      | 2013 | Otitis media                 | 2 | Reported     | Reported     | Not reported | Not reported | Not reported |
| National Institute for Health and Clinical Excellence                               | NICE                                                                                | 2014 | Community-acquired pneumonia | 2 | Reported     | Not reported | Not reported | Reported     | Not reported |
| World Health Organization                                                           | WHO                                                                                 | 2015 | Tuberculosis                 | 5 | Reported     | Reported     | Reported     | Reported     | Reported     |
| Richard M. Rosenfeld et al.                                                         | American Academy of Otolaryngology—Head and Neck                                    | 2015 | Sinusitis                    | 3 | Reported     | Reported     | Reported     | Not reported | Not reported |

|                                            |                                                                     |      |                           |   |              |              |              |              |              |
|--------------------------------------------|---------------------------------------------------------------------|------|---------------------------|---|--------------|--------------|--------------|--------------|--------------|
|                                            | Surgery Foundation                                                  |      |                           |   |              |              |              |              |              |
| World Health Organization                  | WHO                                                                 | 2015 | Tuberculosis              | 5 | Reported     | Reported     | Reported     | Reported     | Reported     |
| Richard M. Rosenfeld et al.                | American Academy of Otolaryngology—Head and Neck Surgery Foundation | 2016 | Otitis media              | 3 | Reported     | Reported     | Reported     | Not reported | Not reported |
| World Health Organization                  | WHO                                                                 | 2016 | Gonorrhoea                | 5 | Reported     | Reported     | Reported     | Reported     | Reported     |
| P. Nahid et al.                            | IDSA                                                                | 2016 | Tuberculosis              | 0 | Not reported |
| Institute for Clinical Systems Improvement | Institute for Clinical Systems Improvement                          | 2017 | Pharyngitis and sinusitis | 1 | Not reported | Reported     | Not reported | Not reported | Not reported |
| Stanford T. Shulman et al.                 | IDSA                                                                | 2012 | Pharyngitis               | 1 | Not reported | Reported     | Not reported | Not reported | Not reported |
| Ministry of Health Malaysia                | Ministry of Health Malaysia                                         | 2012 | Otitis media              | 0 | Not reported |

|                                                       |                                                                                                            |      |              |   |              |              |              |              |              |
|-------------------------------------------------------|------------------------------------------------------------------------------------------------------------|------|--------------|---|--------------|--------------|--------------|--------------|--------------|
| Heidemann CL et al.                                   | Danish Health and Medicines Authority and the Danish Society of Otorhinolaryngology, Head and Neck Surgery | 2016 | Otitis media | 0 | Not reported |
| The Scottish Intercollegiate Guidelines Network       | SIGN                                                                                                       | 2010 | Pharyngitis  | 2 | Reported     | Reported     | Not reported | Not reported | Not reported |
| World Health Organization                             | WHO                                                                                                        | 2011 | Tuberculosis | 4 | Reported     | Reported     | Reported     | Reported     | Not reported |
| Richard M. Rosenfeld et al.                           | American Academy of Otolaryngology                                                                         | 2015 | Sinusitis    | 2 | Reported     | Reported     | Not reported | Not reported | Not reported |
| World Health Organization                             | WHO                                                                                                        | 2018 | Tuberculosis | 5 | Reported     | Reported     | Reported     | Reported     | Reported     |
| World Health Organization                             | WHO                                                                                                        | 2012 | Otitis media | 4 | Reported     | Reported     | Reported     | Reported     | Not reported |
| The National Institute for Health and Care Excellence | NICE                                                                                                       | 2018 | Pharyngitis  | 1 | Not reported | Reported     | Not reported | Not reported | Not reported |

|                                                                                                                                  |               |      |                              |   |              |              |              |              |              |
|----------------------------------------------------------------------------------------------------------------------------------|---------------|------|------------------------------|---|--------------|--------------|--------------|--------------|--------------|
| The National Institute for Health and Care Excellence                                                                            | NICE          | 2019 | Community-acquired pneumonia | 0 | Not reported |
| National Institutes of Health, Centers for Disease Control and Prevention, et al.                                                | NIH, CDC      | 2013 | Tuberculosis                 | 1 | Not reported | Reported     | Not reported | Not reported | Not reported |
| The National Institute for Health and Care Excellence; National Collaborating Centre for Women's and Children's Health (NCC-WCH) | NICE, NCC-WCH | 2008 | Otitis media                 | 3 | Not reported | Reported     | Reported     | Not reported | Reported     |
| United States Preventative Task Force                                                                                            | USPTF         | 2019 | Gonorrhoea                   | 2 | Not reported | Not reported | Not reported | Reported     | Reported     |
